# Supplementary material for: Meta-Quantitative Trait Loci Analysis and Candidate Gene Mining for Drought Tolerance-Associated Traits in Maize (Zea mays L.)
Source: MDPI journal article supplement (doi:10.3390/ijms25084295), 2024-04-12
Supplement: s1 [file s1]

## Supplementary Figures

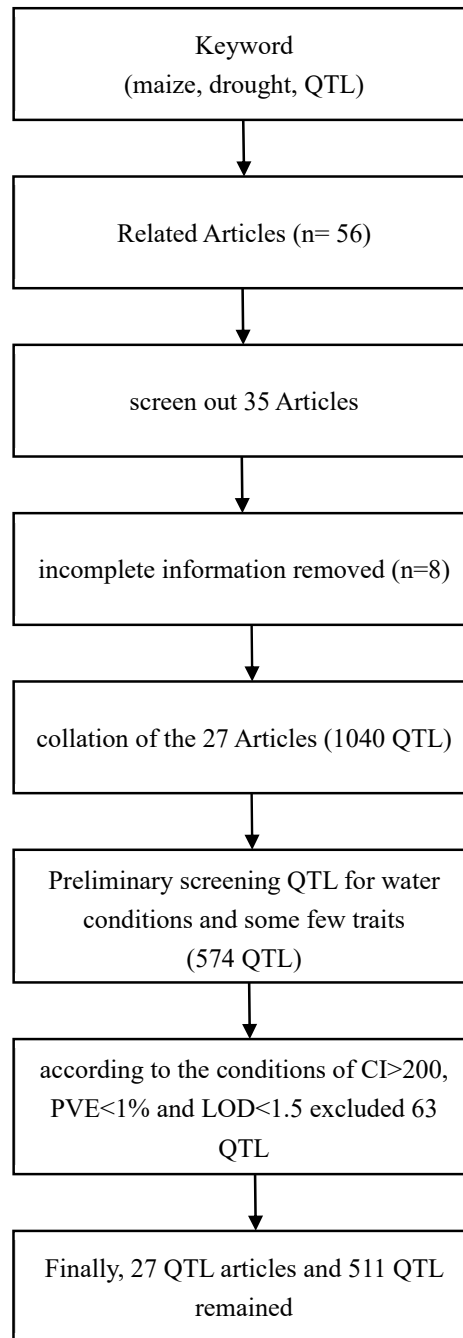

**Figure S1.** Flow diagram of studies reviewed related to maize drought tolerance

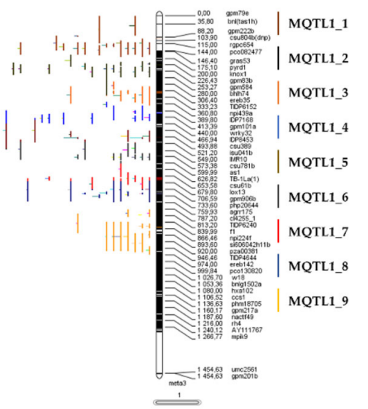

Chr.1

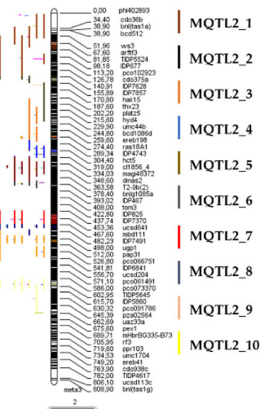

Chr.2

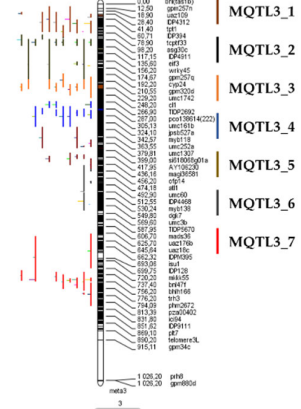

Chr.3

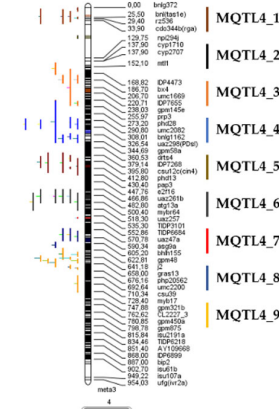

Chr.4

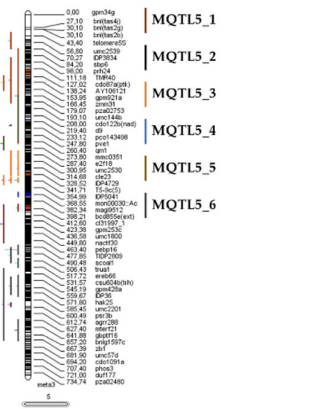

Chr.5

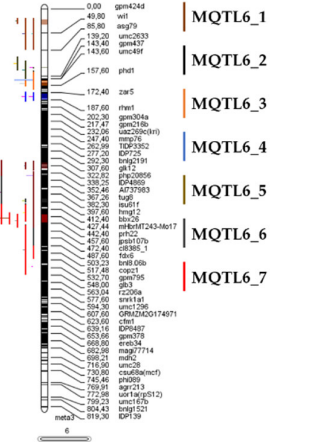

Chr.6

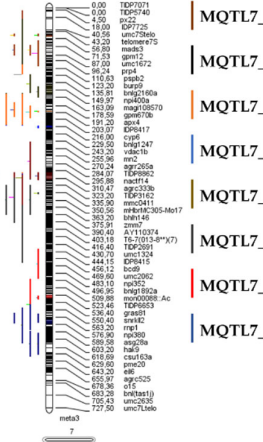

Chr.7

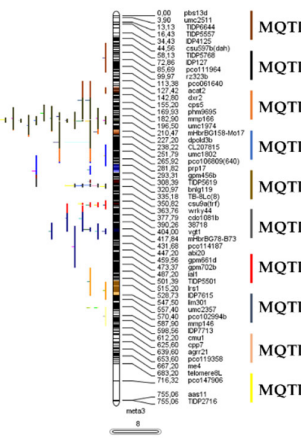

Chr.8

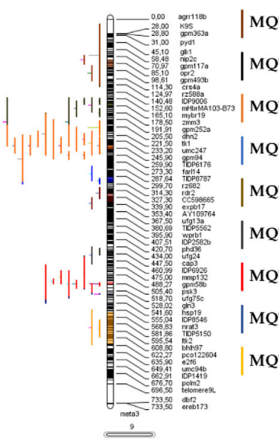

Chr.9

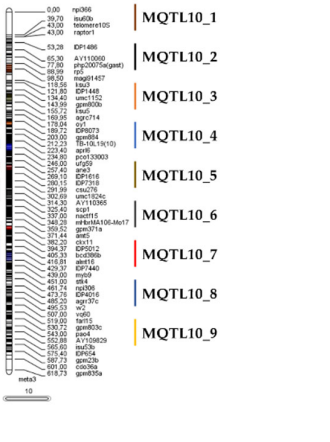

Chr.10

**Figure S2.** Distribution of MQTL on all the 10 maize chromosomes. Vertical lines on the left of chromosomes indicate the CI of the initial QTL, horizontal lines indicate the variance. The initial QTL with the same color of each chromosome is aggregated into an MQTL, MQTL is showing in different color right beside each chromosome, genetic distance (cM) and the marker of IBM2 2008 neighbors on the right of chromosome.
