# Supplementary material for: Meta-Quantitative Trait Loci Analysis and Candidate Gene Mining for Drought Tolerance-Associated Traits in Maize (Zea mays L.)
Source: Int J Mol Sci. 2024 Apr 12;25(8):4295. doi: 10.3390/ijms25084295 (PMC11049847; doi:10.3390/ijms25084295)
Supplement: Supplementary file 1 [file ijms-25-04295-s001.zip]

Archive with 10 entries (10 files):
- Supplementary figures.pdf
- Table S1.xlsx
- Table S2 .xlsx
- Table S3.xlsx
- Table S4.xlsx
- Table S5.xlsx
- Table S6.xlsx
- Table S7.xlsx
- Table S8.xlsx
- Table S9.xlsx
