# Supplementary material for: Meta-Quantitative Trait Loci Analysis and Candidate Gene Mining for Drought Tolerance-Associated Traits in Maize (Zea mays L.)
Source: Int J Mol Sci. 2024 Apr 12;25(8):4295. doi: 10.3390/ijms25084295 (PMC11049847; doi:10.3390/ijms25084295)
Supplement: Supplementary file 1 [file ijms-25-04295-s001.zip › Table S1.xlsx]

## Sheet: Sheet1
Table S1. Collection of maize drought tolerance QTL information
No.	Parents	Type of Crossing	Population Size	Type of Marker	Number of Marker	Number of QTLs	References
1	Lin 1× Xiang97-7	F2:3	160	SSR	110	43	Chen et al.[23]
2	Lo1067×Y i72	F2:3	121	SSR	122	35	Wang et al.[24]
3	N87-1×9526	F3	183	SSR	103	16	Gao et al.[25]
4	Chang7-2×Zhengduqing	BC3F3	49	SNP	16260	10	Li et al.[26]
5	P-138×5003	RIL6	450	SSR	101	14	Jiang et al.[27]
6	A188 × 91 Huang 15	F2:3	139	SSR	133	34	Wu et al.[28]
7	B73 × H99	RILs	142	SSR/AFLP	137	50	Marino et al.[29]
8	5003 × p138	RIL	450	SSR	101	51	Guo et al.[12]
9	DTP79 × B73	F3	116	RFLP/SSR/AFLP	234	45	Ana et al.[13]
10	DTP79 × B73	F3	116	RFLP/SSR/AFLP	234	64	Ana et al.[30]
11	CIMMYT×TZSRWS5	F2	234	RFLP	142	57	Ribaut et al.[31]
12	Ac7643S5×Ac7729/TZSRWS5	RILs	210	RFLP	138	66	Prasanna et al.[32]
13	SD34 × SD35 g	F3	300	RFLP	70	11	Agrama et al.[33]
14	DTP79 × B73	F2:3	105	RFLP	101	22	Rahman et al.[34]
15	H082183×Lv28	F2:3	213	SNP	55K	34	Abdelghany et al.[35]
16	DTP79 × B73	F3	116	RFLP/SSR/AFLP	234	43	Nikoli et al.[36]
17	87-1×zong 3	RIL	221	SSR	261	92	Lu et al.[37]
18	X178×B73	F2:3	234	SSR	121	38	Xiao et al.[38]
19	X178×B73	F2	234	SSR/AFLP	249	45	Hao et al.[39]
20	Qi319/Ye478×Huangzaosi	F2:3	230/235	SSR	194/159	36	Peng et al.[40]
21	N87-1×9526	F2	183	SSR	139	12	Li et al.[41]
22	Mo17×H99	F2:3	150	RFLP	110	29	Veldboom et al.[42]
23	Lo964 × Lo1016	F3	171	RFLP	131	61	Tuberosa et al.[43]
24	Huangzao 4×Ye 107	F3	184	SSR	102	20	Li et al.[44]
25	Ac7643S5× Ac7729/TZSRWS5	F3	234	RFLP	142	46	Ribaut et al.[45]
26	D5×7924	F2:3	180	SSR	120	50	Zhu et al.[46]
27	Mo17 × teosinte X26-4	BC2F5	191	bin	390	16	Tang et al.[9]
