# Supplementary material for: Meta-Quantitative Trait Loci Analysis and Candidate Gene Mining for Drought Tolerance-Associated Traits in Maize (Zea mays L.)
Source: Int J Mol Sci. 2024 Apr 12;25(8):4295. doi: 10.3390/ijms25084295 (PMC11049847; doi:10.3390/ijms25084295)
Supplement: Supplementary file 1 [file ijms-25-04295-s001.zip › Table S2 .xlsx]

## Sheet: Sheet1
Table S2. Original QTL information for meta-QTL analysis
No.	Initial QTLs	Chr	Position in original maps (cM/bp)	LOD	PVE(%)	Peak or flanking markers	Associated raw traits	Character abbreviation	The QTL most likely position in IBM2 map (cM)	Cl start position (cM)	Cl stop position (cM)	References
1	QTL1	8	16	3.28	12.17	phi115-umc1309	Anthesis to silking interval	ASI	306.12	275.04	337.2	Chen et al.[23]
2	QTL2	1	109	2.6	7.89	umc1335(pza02467)-bnlg1556	Anthesis to silking interval	ASI	625.97	593.34	658.6	Chen et al.[23]
3	QTL3	7	41	2.18	6.38	umc2142-umc1450	Anthesis to silking interval	ASI	279.49	244.3	314.68	Chen et al.[23]
4	QTL4	1	110	3.05	7.61	bnlg1556-umc1128	Anthesis to silking interval	ASI	685.05	658.6	711.5	Chen et al.[23]
5	QTL5	3	17	3.65	17.52	umc1746-bnlg1144	Anthesis to silking interval	ASI	42.25	7.5	77	Chen et al.[23]
6	QTL6	9	35	2.79	13.09	umc1037-umc1267	Anthesis to silking interval	ASI	209.29	162.5	256.08	Chen et al.[23]
7	QTL7	3	58	2.89	9.15	umc1773-phi073(gst3)	Plant height	PH	308.265	280.4	336.13	Chen et al.[23]
8	QTL8	5	90	2.97	12.63	mmc0081(dek605)-umc1019(wrky128)	Plant height	PH	429.75	389.9	469.6	Chen et al.[23]
9	QTL9	7	47	2.36	9.04	umc2142(umc1567)-umc1450	Plant height	PH	307.34	300	314.68	Chen et al.[23]
10	QTL10	3	64	2.58	9.85	phi073-umc1311	Plant height	PH	365.465	336.13	394.8	Chen et al.[23]
11	QTL11	5	50	2.34	7.09	umc2298-umc1349	Plant height	PH	326.75	307	346.5	Chen et al.[23]
12	QTL12	8	6	3.01	8.66	bnlg669-umc1360	Plant height	PH	199.3	191	207.6	Chen et al.[23]
13	QTL13	3	21	2.76	8.08	umc1746-bnlg1144	Plant height	PH	42.25	7.5	77	Chen et al.[23]
14	QTL14	1	16	2.55	7.57	umc2224-umc1976	Plant height	PH	135.75	110.9	160.6	Chen et al.[23]
15	QTL15	1	17	6.59	18.27	umc1976-bnlg176	1000 kernel weight	KWT	184.6	160.6	208.6	Chen et al.[23]
16	QTL16	1	83	2.26	8.58	umc2025-umc1508(dof1)	1000 kernel weight	KWT	467	417	517	Chen et al.[23]
17	QTL17	6	75	2.56	8.86	umc1859-phi199852(bzip73)	1000 kernel weight	KWT	395.7	391.4	400	Chen et al.[23]
18	QTL18	9	85	2.3	6.84	umc1733-bnlg1525	1000 kernel weight	KWT	505.66	492.3	519.02	Chen et al.[23]
19	QTL19	1	12	2.27	8.38	umc2224-umc1976	1000 kernel weight	KWT	135.75	110.9	160.6	Chen et al.[23]
20	QTL20	3	59	4.34	11.98	umc1773-phi073	1000 kernel weight	KWT	308.265	280.4	336.13	Chen et al.[23]
21	QTL21	1	12	2.32	8.95	umc2224-umc1976	1000 kernel weight	KWT	135.75	110.9	160.6	Chen et al.[23]
22	QTL22	1	14	4.52	15.84	umc2224-umc1976	Grain yield	GY	135.75	110.9	160.6	Chen et al.[23]
23	QTL23	3	65	2.96	10.39	phi073-umc1311	Grain yield	GY	365.465	336.13	394.8	Chen et al.[23]
24	QTL24	3	56	4.11	12.82	umc1773-phi073	Grain yield	GY	308.265	280.4	336.13	Chen et al.[23]
25	QTL25	9	33	2.55	10.48	umc1037-umc1267	Grain yield	GY	209.29	162.5	256.08	Chen et al.[23]
26	QTL26	1	11	2.32	9.53	umc2224-umc1976	Grain yield	GY	135.75	110.9	160.6	Chen et al.[23]
27	QTL27	1	11	2.36	9.89	umc2224-umc1976	Grain yield	GY	135.75	110.9	160.6	Chen et al.[23]
28	QTL28	1	116	2.54	8.7	bnlg1556-umc1128	Grain yield	GY	685.05	658.6	711.5	Chen et al.[23]
29	QTL29	4	14	3	20	umc2046-umc1574(sbp2)	1000 kernel weight	KWT	650.65	657	644.3	Wang et al.[24]
30	QTL30	10	19.9	3	21	phi96342(kgdh1)-umc1053(incw3)	1000 kernel weight	KWT	266.1	260	272.2	Wang et al.[24]
31	QTL31	4	6.4	3	16	umc2046-umc1574	1000 kernel weight	KWT	650.65	657	644.3	Wang et al.[24]
32	QTL32	1	16.1	2.5	2	phi011-bnlg1347	Cob weight per ear	CWE	898.74	839.3	958.18	Wang et al.[24]
33	QTL33	2	12.7	3.77	2	umc1165(prh16)-phi127	Ear number	EN	249.28	47.4	451.16	Wang et al.[24]
34	QTL34	2	29.3	3.04	4	umc1165-phi127	Ear number	EN	249.28	47.4	451.16	Wang et al.[24]
35	QTL35	2	15	3	14	umc1658-bnlg1036(ask2)	Ear number	EN	374.4	375.3	373.5	Wang et al.[24]
36	QTL36	3	8.5	4	20	bnlg1754-umc2008	Ear number	EN	752	757	747	Wang et al.[24]
37	QTL37	1	23.2	3.63	4	phi011-bnlg1347(bnlg1347b )	Ear weight	EW	898.74	839.3	958.18	Wang et al.[24]
38	QTL38	3	4.2	3	17	bnlg1754-umc2008	Ear weight	EW	752	757	747	Wang et al.[24]
39	QTL39	3	5.6	3	6	umc1754(agrc461)-umc2008	Ear weight	EW	690.34	633.68	747	Wang et al.[24]
40	QTL40	8	9.2	3	19	umc1157-umc1741	Ear weight	EW	207.295	206	208.59	Wang et al.[24]
41	QTL41	1	1.8	3.65	22	phi011(glb1 )-bnlg1347	Kernel number	KN	898.74	839.3	958.18	Wang et al.[24]
42	QTL42	8	11.3	3	19	umc1741-phi121	Kernel number	KN	249.195	208.59	289.8	Wang et al.[24]
43	QTL43	1	23.2	3.22	14	phi011-bnlg1347	Kernel weight per ear	KWE	898.74	839.3	958.18	Wang et al.[24]
44	QTL44	2	1.1	3	10	umc1080(bzip40)-umc1658	Kernel weight per ear	KWE	377.65	380	375.3	Wang et al.[24]
45	QTL45	3	9.4	3	18	bnlg1754-umc2008	Kernel weight per ear	KWE	752	757	747	Wang et al.[24]
46	QTL46	8	6.1	3	14	umc1157-umc1741	Kernel weight per ear	KWE	207.295	206	208.59	Wang et al.[24]
47	QTL47	2	2.3	3	14	nc131(isu89)-bnlg1613	Cob weight per ear	CWE	339.47	343	335.94	Wang et al.[24]
48	QTL48	8	13.3	5	78	umc1741(rps28(8))-phi121	Cob weight per ear	CWE	249.195	208.59	289.8	Wang et al.[24]
49	QTL49	4	165.71	2.86	18.19	umc1573(sbp2)	Grain yield	GY	644.3	636.339	652.261	Gao et al.[25]
50	QTL50	4	150.21	4.27	21.61	umc1418	Drought tolerance index	DTI	634	627.299	640.701	Gao et al.[25]
51	QTL51	4	163.71	6.62	34.1	umc1573	Drought tolerance index	DTI	644.3	640.053	648.547	Gao et al.[25]
52	QTL52	5	18.61	2.57	8.13	umc1416	Drought tolerance index	DTI	54.6	36.7883	72.4117	Gao et al.[25]
53	QTL53	7	47.31	2.57	13.05	bnlg1792	Drought tolerance index	DTI	190.4	179.304	201.496	Gao et al.[25]
54	QTL54	1	56673003	3.72	24.18	SYN11005	Ear weight	EW	328.4	306.034	350.766	Li et al.,[26]
55	QTL55	1	176894699	3.51	23.61	PZE-101136962	Ear weight	EW	492	469.094	514.906	Li et al.,[26]
56	QTL56	5	138500036	3.51	23.61	SYN37542	Ear weight	EW	317.4	294.494	340.306	Li et al.,[26]
57	QTL57	10	117558317	3.61	24.69	PZE-110062671	Ear weight	EW	273.36	251.456	295.264	Li et al.,[26]
58	QTL58	1	176894699	3.78	22.44	PZE-101136962	Grain weight per spike	KWE	492	467.899	516.101	Li et al.,[26]
59	QTL59	3	198565664	4.58	21.44	PZE-103145474	Grain weight per spike	KWE	538.8	513.575	564.025	Li et al.,[26]
60	QTL60	5	138500036	4.2	24.92	SYN37542	Grain weight per spike	KWE	317.4	295.698	339.102	Li et al.,[26]
61	QTL61	10	117558317	5.94	24.62	PZE-110062671	Grain weight per spike	KWE	273.36	251.393	295.327	Li et al.,[26]
62	QTL62	9	31021266	3.39	36.59	PZE-109028919	100 kernels weight	KWT	220.76	205.98	235.54	Li et al.,[26]
63	QTL63	10	117558317	3.22	34.12	PZE-110062671	100 kernels weight	KWT	273.36	257.51	289.21	Li et al.,[26]
64	QTL64	4	0.01	2.59	2.51	bnlg1434	Plant height	PH	4.3	-2.91558	11.5156	Jiang et al.,[27]
65	QTL65	10	4.01	2.05	2.27	bnlg1655	Plant height	PH	228	220.022	235.978	Jiang et al.,[27]
66	QTL66	3	4.01	2.02	2.12	phi053(umc102a)	Plant height	PH	297.9	289.357	306.443	Jiang et al.,[27]
67	QTL67	9	2.01	1.55	1.71	bnlg279	Plant height	PH	527.61	517.019	538.201	Jiang et al.,[27]
68	QTL68	9	6.01	1.49	1.9	phi022(wx1)	Plant height	PH	191.7	182.168	201.232	Jiang et al.,[27]
69	QTL69	9	4.01	2.41	2.72	bnlg1082	Plant height	PH	169.98	163.322	176.638	Jiang et al.,[27]
70	QTL70	9	2.01	2.14	2.42	bnlg1209	Plant height	PH	273.2	265.716	280.684	Jiang et al.,[27]
71	QTL71	1	4.01	2.1	2.43	bnlg1035(zhd21)	Grain yield	GY	313.4	305.947	320.853	Jiang et al.,[27]
72	QTL72	2	0.01	2.05	2.03	bnlg1225	Grain yield	GY	379.2	370.278	388.122	Jiang et al.,[27]
73	QTL73	7	8.01	1.08	1.83	phi082	Grain yield	GY	590.08	580.183	599.977	Jiang et al.,[27]
74	QTL74	5	6.01	1.33	2.11	phi087	Grain yield	GY	493.7	485.117	502.283	Jiang et al.,[27]
75	QTL75	6	4.01	1.24	1.58	phi081	Grain yield	GY	323.5	312.037	334.963	Jiang et al.,[27]
76	QTL76	2	10	3.85	35	umc2403	Anthesis to silking interval	ASI	102.4	90.4	114.4	Wu et al.[28]
77	QTL77	2	8	2.96	11.1	umc2246	Anthesis to silking interval	ASI	5.1	3.1	7.1	Wu et al.[28]
78	QTL78	5	24	2.53	9.1	bnlg1118	Anthesis to silking interval	ASI	595.4	590.4	600.4	Wu et al.[28]
79	QTL79	6	14	2.68	10.7	phi077	Anthesis to silking interval	ASI	122.11	121.11	123.11	Wu et al.[28]
80	QTL80	9	6	4.34	16.4	phi448880	Anthesis to silking interval	ASI	537.8	536.8	538.8	Wu et al.[28]
81	QTL81	8	40	4.77	16.6	bnlg1176(a)	Number of days tasseling	MF	335.4	330.4	340.4	Wu et al.[28]
82	QTL82	1	4	2.64	9.5	phi037	Number of days tasseling	MF	729.4	722.4	736.4	Wu et al.[28]
83	QTL83	1	10	3.89	13.8	umc2116	Number of days tasseling	MF	811.88	809.88	813.88	Wu et al.[28]
84	QTL84	8	8	6.91	25	umc1868	Number of days tasseling	MF	205.3	200.3	210.3	Wu et al.[28]
85	QTL85	8	2	8.82	31	bnlg1176	Number of days tasseling	MF	334.4	330.4	338.4	Wu et al.[28]
86	QTL86	10	6	4.11	12.7	umc2053	Number of days tasseling	MF	77.2	76.2	78.2	Wu et al.[28]
87	QTL87	1	8	2.49	9.7	phi037	Flowering days	FD	725.4	722.4	728.4	Wu et al.[28]
88	QTL88	8	6	5.02	19.4	bnlg1176	Flowering days	FD	334.4	330.4	338.4	Wu et al.[28]
89	QTL89	8	6	5.56	20.5	bnlg1176	Spinning days	FF	334.4	330.4	338.4	Wu et al.[28]
90	QTL90	2	4	3.57	14.6	umc2246	Spinning days	FF	6.1	3.1	9.1	Wu et al.[28]
91	QTL91	6	10	3.2	58	umc1083	Spinning days	FF	147.8	127.8	167.8	Wu et al.[28]
92	QTL92	1	2	2.63	9.9	phi037	Spinning days	FF	725.4	722.4	728.4	Wu et al.[28]
93	QTL93	8	2	8.4	28.3	bnlg1176	Spinning days	FF	333.4	330.4	336.4	Wu et al.[28]
94	QTL94	3	90	1.682	1.98	TC328384	Ear length	EL	228	199.013	256.987	Marino et al.[29]
95	QTL95	5	64	1.907	6.76	TC326148	Ear length	EL	340	331.51	348.49	Marino et al.[29]
96	QTL96	8	123	2.56	6.9	TC334508	Ear length	EL	372	363.682	380.318	Marino et al.[29]
97	QTL97	1	61	5.635	1.91	bnlg2295	Ear weight	EW	398.2	368.151	428.249	Marino et al.[29]
98	QTL98	2	176	1.794	5.2	bnlg1520	Ear weight	EW	599.13	588.093	610.167	Marino et al.[29]
99	QTL99	3	90	5.816	4.87	TC328384	Ear weight	EW	228	216.215	239.785	Marino et al.[29]
100	QTL100	5	66	2.771	10.01	TC326148	Ear weight	EW	340	334.266	345.734	Marino et al.[29]
101	QTL101	7	52	4.576	2.46	phi008b(pld11）	Ear weight	EW	612.4	589.069	635.731	Marino et al.[29]
102	QTL102	8	123	6.581	12.01	TC334508	Ear weight	EW	372	367.221	376.779	Marino et al.[29]
103	QTL103	10	63	1.946	6.5	umc2003	Ear weight	EW	308.6	299.77	317.43	Marino et al.[29]
104	QTL104	10	100	2.824	0.11	dupssr37	Ear weight	EW	380	-141.767	901.767	Marino et al.[29]
105	QTL105	1	61	5.135	1.88	bnlg2295	Kernel weight per ear	KWE	398.2	367.671	428.729	Marino et al.[29]
106	QTL106	2	176	1.746	4.97	bnlg1520	Kernel weight per ear	KWE	599.13	587.582	610.678	Marino et al.[29]
107	QTL107	3	88	6.458	5.63	TC328384	Kernel weight per ear	KWE	228	217.806	238.194	Marino et al.[29]
108	QTL108	3	112	1.894	0.14	umc1400	Kernel weight per ear	KWE	385.52	-24.4398	795.48	Marino et al.[29]
109	QTL109	5	68	2.204	8.68	TC326148	Kernel weight per ear	KWE	340	333.388	346.612	Marino et al.[29]
110	QTL110	7	52	5.602	2.91	phi008b	Kernel weight per ear	KWE	612.4	592.677	632.123	Marino et al.[29]
111	QTL111	8	122	4.075	10.88	TC334508	Kernel weight per ear	KWE	372	366.725	377.275	Marino et al.[29]
112	QTL112	9	94	2.911	2.39	bnlg430	Kernel weight per ear	KWE	242.02	218.006	266.034	Marino et al.[29]
113	QTL113	1	156	2.209	3.93	TC332499	FIfty Kernel weight	KWT	892	877.396	906.604	Marino et al.[29]
114	QTL114	2	189	1.65	3.58	csu64a(grf）	FIfty Kernel weight	KWT	599.46	583.428	615.492	Marino et al.[29]
115	QTL115	3	225	4.587	3.9	E35M5503	FIfty Kernel weight	KWT	740	725.283	754.717	Marino et al.[29]
116	QTL116	5	17	2.708	0.66	TC367492	FIfty Kernel weight	KWT	98	11.0388	184.961	Marino et al.[29]
117	QTL117	5	62	2.507	8.43	TC326148	FIfty Kernel weight	KWT	340	333.192	346.808	Marino et al.[29]
118	QTL118	5	103	2.649	7.23	TC315883	FIfty Kernel weight	KWT	397	389.062	404.938	Marino et al.[29]
119	QTL119	9	87	1.815	1.5	bnlg430	FIfty Kernel weight	KWT	242.02	203.757	280.283	Marino et al.[29]
120	QTL120	3	89	5.866	5.54	TC328384	Kernel number	KN	228	217.64	238.36	Marino et al.[29]
121	QTL121	3	109	3.129	0.7	umc1973	Kernel number	KN	371.4	289.408	453.392	Marino et al.[29]
122	QTL122	7	22	2.502	5.65	TC318595	Kernel number	KN	154	143.842	164.158	Marino et al.[29]
123	QTL123	8	98	4.415	12.7	bnl9.08	Kernel number	KN	228.76	224.241	233.279	Marino et al.[29]
124	QTL124	2	21	6.182	6.9	E38M6109	Plant height	PH	148	139.682	156.318	Marino et al.[29]
125	QTL125	5	67	5.237	5.35	TC326148	Plant height	PH	340	329.272	350.728	Marino et al.[29]
126	QTL126	8	152	6.274	10.07	bnlg240	Plant height	PH	423.72	418.02	429.42	Marino et al.[29]
127	QTL127	9	176	1.928	1.54	bnlg1525	Plant height	PH	519.02	481.751	556.289	Marino et al.[29]
128	QTL128	4	92	2.201	3.98	TC316131	Male flowering time	MF	296	281.579	310.421	Marino et al.[29]
129	QTL129	5	44	2.828	3.45	bnlg105(bnlg105a）	Male flowering time	MF	182.54	165.904	199.176	Marino et al.[29]
130	QTL130	7	18	2.801	6	E35M5507	Male flowering time	MF	78	68.4343	87.5657	Marino et al.[29]
131	QTL131	8	84	2.303	3.42	TC359617	Male flowering time	MF	206.6	189.818	223.382	Marino et al.[29]
132	QTL132	9	100	4.432	3.58	bnlg430	Male flowering time	MF	242.02	225.988	258.052	Marino et al.[29]
133	QTL133	7	19	2.105	5.48	E35M5507	FeMale flowering time	FF	78	67.5266	88.4734	Marino et al.[29]
134	QTL134	8	88	1.944	6.57	TC359617	FeMale flowering time	FF	206.6	197.864	215.336	Marino et al.[29]
135	QTL135	9	222	2.493	3.33	umc1137	FeMale flowering time	FF	603.5	586.264	620.736	Marino et al.[29]
136	QTL136	10	28	2.571	3.82	umc1582(aasr1）	FeMale flowering time	FF	143.5	128.475	158.525	Marino et al.[29]
137	QTL137	1	37	1.998	1.48	bnlg1016	Anthesis silking interval	ASI	328.48	289.7	367.26	Marino et al.[29]
138	QTL138	2	193	1.861	6.11	csu64a(grf）	Anthesis silking interval	ASI	599.46	590.066	608.854	Marino et al.[29]
139	QTL139	3	144	2.221	3.2	bnlg1350(bnlg1350a）	Anthesis silking interval	ASI	439.72	421.784	457.656	Marino et al.[29]
140	QTL140	8	87	1.925	6.77	TC359617	Anthesis silking interval	ASI	206.6	198.122	215.078	Marino et al.[29]
141	QTL141	9	94	1.755	5.05	bnlg430	Anthesis silking interval	ASI	242.02	230.655	253.385	Marino et al.[29]
142	QTL142	10	61	1.728	2.84	umc2003	Anthesis silking interval	ASI	308.6	288.391	328.809	Marino et al.[29]
143	QTL143	1	NA	2.27	2.69	bnlg1614(a)	Plant height	PH	122.64	115.907	129.373	Guo et al.,[12]
144	QTL144	1	NA	2.48	4.12	bnlg1083	Plant height	PH	198.3	193.904	202.696	Guo et al.,[12]
145	QTL145	3	NA	1.7	1.68	phi053	Plant height	PH	297.9	287.12	308.68	Guo et al.,[12]
146	QTL146	3	NA	1.87	1.97	phi053	Plant height	PH	297.9	288.707	307.093	Guo et al.,[12]
147	QTL147	9	NA	1.87	2.13	bnlg1209	Plant height	PH	273.2	264.697	281.703	Guo et al.,[12]
148	QTL148	9	NA	2.37	2.57	bnlg1082	Plant height	PH	169.98	162.933	177.027	Guo et al.,[12]
149	QTL149	4	NA	1.89	3.46	bnlg1241	Male flower time	MF	77.14	71.9056	82.3744	Guo et al.,[12]
150	QTL150	5	NA	2.29	3.28	bnlg1063	Male flower time	MF	370	364.478	375.522	Guo et al.,[12]
151	QTL151	8	NA	2.58	13.3	bnlg1812	Male flower time	MF	370.04	368.678	371.402	Guo et al.,[12]
152	QTL152	8	NA	2.4	3.01	bnlg1327(wrky70)	Male flower time	MF	148.1	142.083	154.117	Guo et al.,[12]
153	QTL153	5	NA	2.02	1.97	bnlg1063	Female flower time	FF	370	360.807	379.193	Guo et al.,[12]
154	QTL154	6	NA	1.87	2.4	nc012(pdk1)	Female flower time	FF	323.5	315.954	331.046	Guo et al.,[12]
155	QTL155	5	NA	1.86	2.85	bnlg1346	Anthesis-silking interval	ASI	554.92	548.565	561.275	Guo et al.,[12]
156	QTL156	6	NA	1.68	5.34	bnlg1136(a)	Anthesis-silking interval	ASI	531.8	528.408	535.192	Guo et al.,[12]
157	QTL157	9	NA	1.62	2.11	phi022	Kernel yield per plot	GY	191.7	183.117	200.283	Guo et al.,[12]
158	QTL158	6	NA	1.76	1.68	nc012	Kernel rows per ear	NRE	323.5	312.72	334.28	Guo et al.,[12]
159	QTL159	7	NA	1.87	2.04	bnlg2328(b)	Kernel rows per ear	NRE	565.62	556.742	574.498	Guo et al.,[12]
160	QTL160	10	NA	1.72	2.08	bnlg2042	Kernel rows per ear	NRE	104.99	96.2827	113.697	Guo et al.,[12]
161	QTL161	1	NA	1.97	2	bnlg1083	100 kernel weight	KW	198.3	189.244	207.356	Guo et al.,[12]
162	QTL162	1	NA	2.13	5.68	bnlg1564	Drought tolerance index	DTI	718.5	715.311	721.689	Guo et al.,[12]
163	QTL163	1	NA	1.89	2.06	bnlg1035	Drought tolerance index	DTI	313.4	304.608	322.192	Guo et al.,[12]
164	QTL164	7	NA	1.9	1.91	bnlg2328	Drought tolerance index	DTI	565.62	556.138	575.102	Guo et al.,[12]
165	QTL165	10	NA	1.7	1.73	bnlg2190	Drought tolerance index	DTI	412.3	401.831	422.769	Guo et al.,[12]
166	QTL166	2	NA	2.13	0.1	umc49a-CSU109(a)	Grain yield	GY	626.3	591.5	661.1	Ana et al.,[13]
167	QTL167	5	NA	2.99	4.51	RGC488-RZ508	Grain yield	GY	264.62	250	279.24	Ana et al.,[13]
168	QTL168	5	NA	2.2	5.31	CSU26-php10017	Grain yield	GY	594.75	520.1	669.4	Ana et al.,[13]
169	QTL169	7	NA	2.4	3.46	csu11-bnlg434(bzip7)	Grain yield	GY	350.07	377.44	322.7	Ana et al.,[13]
170	QTL170	1	NA	2.03	10.98	DHN4b-BCD1072(bcd1072c)	Number of rows per ear	NRE	857.3	847	867.6	Ana et al.,[13]
171	QTL171	1	NA	2.41	11.08	umc107(uce5)-umc161(umc161a)	Number of rows per ear	NRE	925.25	886.9	963.6	Ana et al.,[13]
172	QTL172	5	NA	3.54	3.54	RGC488-RZ508	Number of rows per ear	NRE	264.62	250	279.24	Ana et al.,[13]
173	QTL173	5	NA	2.21	8.97	RZ508-hhu503b	Number of rows per ear	NRE	290.62	279.24	302	Ana et al.,[13]
174	QTL174	10	NA	3.38	11.47	bnl7.49-csu48(dba3)	Number of rows per ear	NRE	485.4	437.6	533.2	Ana et al.,[13]
175	QTL175	3	NA	2.25	7.42	csu16-MACE01E07	Number of kernels per row	NKR	106	96	116	Ana et al.,[13]
176	QTL176	3	NA	2.03	13.19	umc60a-RGC122	Number of kernels per row	NKR	275	266	284	Ana et al.,[13]
177	QTL177	4	NA	3.41	8.87	RZ567(rz567b(klc))-bnl8.45(pza03275)	Number of kernels per row	NKR	399.495	373.3	425.69	Ana et al.,[13]
178	QTL178	4	NA	2.36	13.16	bnlg1927-hhu503a(ns2)	Number of kernels per row	NKR	485.545	467.1	503.99	Ana et al.,[13]
179	QTL179	5	NA	2.91	1.77	RZ508-SB854	Number of kernels per row	NKR	305.62	279.24	332	Ana et al.,[13]
180	QTL180	7	NA	3.14	1.65	csu150-csu81(csu81a(ank))	Number of kernels per row	NKR	185.65	155.8	215.5	Ana et al.,[13]
181	QTL181	7	NA	2.46	0.2	CSU81-M54/2cb	Number of kernels per row	NKR	274.75	215.5	334	Ana et al.,[13]
182	QTL182	1	NA	3.97	3.97	tub1-umc157(umc157a(chn))	1000 kernels weight	KWT	58.44	2.48	114.4	Ana et al.,[13]
183	QTL183	1	NA	2.74	15.53	umc157-M52/1B	1000 kernels weight	KWT	128.95	114.4	143.5	Ana et al.,[13]
184	QTL184	2	NA	2.01	28.86	CSU109-csu166	1000 kernels weight	KWT	662.55	661.1	664	Ana et al.,[13]
185	QTL185	7	NA	2.54	2.34	bnl16.06-phi116	1000 kernels weight	KWT	578.94	546.38	611.5	Ana et al.,[13]
186	QTL186	10	NA	3.75	34.18	RZ740a-bnlg1074	1000 kernels weight	KWT	322.05	312	332.1	Ana et al.,[13]
187	QTL187	2	NA	4.37	9.59	csu56c-bnlg108	Ear length	EL	299.83	293.36	306.3	Ana et al.,[13]
188	QTL188	3	NA	5.15	5.15	CSU16-MACE01E07	Ear length	EL	106	96	116	Ana et al.,[13]
189	QTL189	3	NA	3.89	8.36	MACE01E07-RZ141	Ear length	EL	226.045	116	336.09	Ana et al.,[13]
190	QTL190	8	NA	3.51	14.7	RZ543(rz543b)-bnlg1834	Ear length	EL	166.755	128.71	204.8	Ana et al.,[13]
191	QTL191	10	NA	8.76	45.41	M49/2C-umc44	Ear length	EL	362	352	372	Ana et al.,[13]
192	QTL192	3	NA	2.23	3.86	csu134-umc1057(cko1)	Ear diameter	ED	90.8	84	97.6	Ana et al.,[13]
193	QTL193	4	NA	2.03	10.23	bnlg1927-hhu503a	Ear diameter	ED	485.545	467.1	503.99	Ana et al.,[13]
194	QTL194	5	NA	2.45	8.66	RZ508-hhu503b	Ear diameter	ED	290.62	279.24	302	Ana et al.,[13]
195	QTL195	5	NA	2.68	4.9	hhu503b-SB854	Ear diameter	ED	317	302	332	Ana et al.,[13]
196	QTL196	7	NA	3.25	7.6	CSU81-RGC506	Ear diameter	ED	217.75	215.5	220	Ana et al.,[13]
197	QTL197	5	NA	4.22	10.16	RGC488-RZ508	Kernel length	KL	264.62	250	279.24	Ana et al.,[13]
198	QTL198	7	NA	2.44	32.08	csu29a-phi051	Kernel length	KL	337.925	31.71	644.14	Ana et al.,[13]
199	QTL199	1	NA	2.05	0.3	umc107-bnlg2331	Kernel width	KW	956.495	886.9	1026.09	Ana et al.,[13]
200	QTL200	2	NA	2.01	8.68	umc53(a(lox6))-bnlg1327	Kernel width	KW	99.5	50.9	148.1	Ana et al.,[13]
201	QTL201	2	NA	5.04	20.23	bnlg108-csu481	Kernel width	KW	313.15	306.3	320	Ana et al.,[13]
202	QTL202	6	NA	3.02	6.46	umc132(umc132a(chk))-CDO202(cdo202a(mcf))	Kernel width	KW	496.45	444.2	548.7	Ana et al.,[13]
203	QTL203	7	NA	2.01	0.5	csu150-CDO412	Kernel width	KW	215.3	155.8	274.8	Ana et al.,[13]
204	QTL204	2	NA	2.57	0.1	umc61-csu56c(ohp)	Kernel thickness	KT	243.33	193.3	293.36	Ana et al.,[13]
205	QTL205	5	NA	3.97	6.74	hhu503b-SB854	Kernel thickness	KT	317	302	332	Ana et al.,[13]
206	QTL206	7	NA	2.55	0.4	csu129-cdo412(b)	Kernel thickness	KT	190.785	106.77	274.8	Ana et al.,[13]
207	QTL207	8	NA	4	1.98	PSR74-umc39(b)	Kernel thickness	KT	368.525	254.04	483.01	Ana et al.,[13]
208	QTL208	10	NA	3.37	18.24	php20075(php20075a(gast))-umc130	Kernel thickness	KT	97.4	34.8	160	Ana et al.,[13]
209	QTL209	2	18	2.12364	0.1	umc49a-csu109	Grain yield	GY	626.3	591.5	661.1	Ana et al.[30]
210	QTL210	5	7	2.98482	4.51	rgc488-rz508	Grain yield	GY	264.62	250	279.24	Ana et al.[30]
211	QTL211	5	18	2.19523	5.31	csu26-php10017	Grain yield	GY	594.75	520.1	669.4	Ana et al.[30]
212	QTL212	7	3	2.39696	3.46	csu11-bnlg434	Grain yield	GY	350.07	377.44	322.7	Ana et al.[30]
213	QTL213	2	7	4.36443	9.59	csu56c-bnlg108	Ear length	EL	299.83	293.36	306.3	Ana et al.[30]
214	QTL214	3	3	5.14751	13.07	csu16-MACE01E07	Ear length	EL	106	96	116	Ana et al.[30]
215	QTL215	3	5	3.88937	8.36	MACE01E07-rz141	Ear length	EL	226.045	116	336.09	Ana et al.[30]
216	QTL216	8	3	3.50759	14.7	rz543-bnlg1834	Ear length	EL	166.755	128.71	204.8	Ana et al.[30]
217	QTL217	10	13	8.75488	45.41	M49/2c-umc44	Ear length	EL	362	352	372	Ana et al.[30]
218	QTL218	3	3	2.25163	7.42	csu16-MACE01E07	Number of kernels per row	NKR	106	96	116	Ana et al.[30]
219	QTL219	3	15	2.03254	13.19	umc60a-rgc122	Number of kernels per row	NKR	275	266	284	Ana et al.[30]
220	QTL220	4	11	3.40564	8.87	rz567-bnl8.45	Number of kernels per row	NKR	399.495	373.3	425.69	Ana et al.[30]
221	QTL221	4	15	2.36226	13.16	bnlg1927-hhu503a	Number of kernels per row	NKR	485.545	467.1	503.99	Ana et al.[30]
222	QTL222	5	9	2.90889	1.77	rz508-sb854	Number of kernels per row	NKR	305.62	279.24	332	Ana et al.[30]
223	QTL223	7	1	3.141	1.65	csu150-csu81	Number of kernels per row	NKR	185.65	155.8	215.5	Ana et al.[30]
224	QTL224	7	4	2.45987	0.2	csu81-M54/2’cb	Number of kernels per row	NKR	219.75	215.5	224	Ana et al.[30]
225	QTL225	1	22	2.02603	10.98	Dhn4b-bcd1072	Number of rows per ear	NRE	857.3	847	867.6	Ana et al.[30]
226	QTL226	1	23	2.41215	11.08	umc107-umc161	Number of rows per ear	NRE	925.25	886.9	963.6	Ana et al.[30]
227	QTL227	5	6	3.53579	12.68	rgc488-rz508	Number of rows per ear	NRE	264.62	250	279.24	Ana et al.[30]
228	QTL228	5	9	2.19306	8.97	rz508-hhu503b	Number of rows per ear	NRE	290.62	279.24	302	Ana et al.[30]
229	QTL229	10	17	3.37961	11.47	bnl7.49-csu48	Number of rows per ear	NRE	485.4	437.6	533.2	Ana et al.[30]
230	QTL230	3	3	2.41866	0.1	csu34-umc1057	Anthesis to silking interval	ASI	90.8	84	97.6	Ana et al.[30]
231	QTL231	4	13	2.06941	7.87	bnlg1927-hhu503a	Anthesis to silking interval	ASI	485.545	467.1	503.99	Ana et al.[30]
232	QTL232	7	1	4.34056	18.13	csu150-csu129	Anthesis to silking interval	ASI	83.385	60	106.77	Ana et al.[30]
233	QTL233	4	1	2.73102	11.91	umc123-umc31(umc1561)	Drought score on 24th July	DTI	27.905	24.6	31.21	Ana et al.[30]
234	QTL234	5	14	4.03471	10.11	csu110-csu26	Drought score on 24th July	DTI	510.05	500	520.1	Ana et al.[30]
235	QTL235	8	9	2.27766	11.68	umc12(a)-umc30(a)	Drought score on 24th July	DTI	398.9	372.6	425.2	Ana et al.[30]
236	QTL236	1	7	2.92408	9.28	blt101.97-umc49b	Drought score after rain	DTI	338	320	356	Ana et al.[30]
237	QTL237	2	12	2.83948	8.24	bnlg108-csu481	Drought score after rain	DTI	313.15	306.3	320	Ana et al.[30]
238	QTL238	3	1	3.69197	15.01	csu34-aba14	Drought score after rain	DTI	100	84	116	Ana et al.[30]
239	QTL239	6	3	1.96529	4.06	bnlg1043-bnlg426	Drought score after rain	DTI	52.49	20.2	84.78	Ana et al.[30]
240	QTL240	6	6	3.75271	19.01	umc1006-csu95b	Drought score after rain	DTI	266.75	125	408.5	Ana et al.[30]
241	QTL241	1	8	3.49675	11.45	bnlg1811-csu91	Drought score in the afternoon	DTI	467.03	386.4	547.66	Ana et al.[30]
242	QTL242	9	3	3.08894	0.1	csu95a-bnlg1372	Drought score in the afternoon	DTI	78.73	41.68	115.78	Ana et al.[30]
243	QTL243	10	12	6.93709	26.55	bnlg1074-umc44	Drought score in the afternoon	DTI	352.05	332.1	372	Ana et al.[30]
244	QTL244	1	83	3.29	6.5	umc53b	Male flowering	MF	420.56	403.137	437.983	Ribaut et al.[31]
245	QTL245	1	145	3.49	7.9	umc119	Male flowering	MF	575.9	561.565	590.235	Ribaut et al.[31]
246	QTL246	4	59	2.75	7.7	bnl5.71b	Male flowering	MF	300.33	285.622	315.038	Ribaut et al.[31]
247	QTL247	6	86	3.09	6.1	csu60	Male flowering	MF	420	401.435	438.565	Ribaut et al.[31]
248	QTL248	1	83	2.3	4.6	umc53b	Male flowering	MF	420.56	395.941	445.179	Ribaut et al.[31]
249	QTL249	1	145	3.36	7.6	umc119	Male flowering	MF	575.9	560.999	590.801	Ribaut et al.[31]
250	QTL250	2	17	2.81	5.7	umc53a	Male flowering	MF	50.9	31.032	70.768	Ribaut et al.[31]
251	QTL251	2	163	2.86	9	umc150b	Male flowering	MF	526.61	514.027	539.193	Ribaut et al.[31]
252	QTL252	4	60	3.52	9.1	bnl5.71b	Male flowering	MF	300.33	287.885	312.775	Ribaut et al.[31]
253	QTL253	5	9	2.1	5.1	umc147a	Male flowering	MF	98.93	76.7245	121.135	Ribaut et al.[31]
254	QTL254	1	83	4.52	8.9	umc53b	FeMale flowering	FF	420.56	407.836	433.284	Ribaut et al.[31]
255	QTL255	1	162	5.23	13.3	umc33a	FeMale flowering	FF	664.17	655.655	672.685	Ribaut et al.[31]
256	QTL256	2	172	2.72	8.9	umc150b	FeMale flowering	FF	526.61	513.886	539.334	Ribaut et al.[31]
257	QTL257	8	77	2.2	4.4	bnl10.39	FeMale flowering	FF	217.07	191.332	242.808	Ribaut et al.[31]
258	QTL258	9	97	4.36	9.4	csu59	FeMale flowering	FF	364.49	352.442	376.538	Ribaut et al.[31]
259	QTL259	1	75	3.35	7.4	umc11	FeMale flowering	FF	218.8	203.496	234.104	Ribaut et al.[31]
260	QTL260	1	200	3.08	7.1	csu20	FeMale flowering	FF	805.6	789.65	821.55	Ribaut et al.[31]
261	QTL261	2	173	3.06	8.8	csu64a	FeMale flowering	FF	599.46	586.591	612.329	Ribaut et al.[31]
262	QTL262	4	60	2.94	8	bnl5.71b	FeMale flowering	FF	300.33	286.174	314.486	Ribaut et al.[31]
263	QTL263	5	143	2.52	6	umc68	FeMale flowering	FF	557.09	538.215	575.965	Ribaut et al.[31]
264	QTL264	8	82	2.26	5.4	bnl10.39	FeMale flowering	FF	217.07	196.098	238.042	Ribaut et al.[31]
265	QTL265	9	106	3.09	6.6	csu93a	FeMale flowering	FF	463.9	446.741	481.059	Ribaut et al.[31]
266	QTL266	10	100	2.53	6.4	bnl7.49a	FeMale flowering	FF	437.6	419.905	455.295	Ribaut et al.[31]
267	QTL267	1	203	3.47	7.2	csu20	Anthesis-silking interval	ASI	805.6	789.871	821.329	Ribaut et al.[31]
268	QTL268	5	147	2.2	6.9	umc68	Anthesis-silking interval	ASI	557.09	540.677	573.503	Ribaut et al.[31]
269	QTL269	6	76	3.94	10.8	csu116a	Anthesis-silking interval	ASI	181.98	171.494	192.466	Ribaut et al.[31]
270	QTL270	8	76	2.31	5	umc120a	Anthesis-silking interval	ASI	202.68	180.03	225.33	Ribaut et al.[31]
271	QTL271	10	101	2.96	7.7	umc182	Anthesis-silking interval	ASI	380.96	366.252	395.668	Ribaut et al.[31]
272	QTL272	5	147	2.32	5	umc68	Anthesis-silking interval	ASI	557.09	534.44	579.74	Ribaut et al.[31]
273	QTL273	6	79	5.69	13	csu116a	Anthesis-silking interval	ASI	181.98	173.269	190.691	Ribaut et al.[31]
274	QTL274	8	75	2.59	5.3	umc120a	Anthesis-silking interval	ASI	202.68	181.312	224.048	Ribaut et al.[31]
275	QTL275	2	166	2.00217	3.17	bnl6.29-umc137	100-kernel weight	KWT	500.8	492	509.6	Prasanna et al.[32]
276	QTL276	10	68	2.02603	3.89	umc354-umc182	Anthesis to silking interval	ASI	375.48	370	380.96	Prasanna et al.[32]
277	QTL277	1	238	2.28416	4.98	umc316-umc107	Anthesis to silking interval	ASI	846.25	805.6	886.9	Prasanna et al.[32]
278	QTL278	2	108	3.80911	5.62	umc8-umc55	Male flowering	MF	348.88	315.5	382.26	Prasanna et al.[32]
279	QTL279	4	153	2.29067	5.1	umc318-umc66	Male flowering	MF	388.35	379.3	397.4	Prasanna et al.[32]
280	QTL280	9	113	2.30586	2.49	umc366-umc358	Male flowering	MF	456.95	450	463.9	Prasanna et al.[32]
281	QTL281	2	169	2.50325	3.11	bnl6.29-umc137	Grain yield per plant	GY	500.8	492	509.6	Prasanna et al.[32]
282	QTL282	2	192	2.59653	4.73	umc150-umc344	Grain yield per plant	GY	563.035	526.61	599.46	Prasanna et al.[32]
283	QTL283	3	220	2.85683	5.66	umc17-umc96	Grain yield per plant	GY	686.295	585.5	787.09	Prasanna et al.[32]
284	QTL284	5	103	3.20174	6.06	bnl6.22-bnl5.71	Grain yield per plant	GY	331.85	276.7	387	Prasanna et al.[32]
285	QTL285	2	166	2.4295	5.82	bnl6.29-umc137	Grain yield per plant	GY	500.8	492	509.6	Prasanna et al.[32]
286	QTL286	10	84	2.718	3.84	umc354-umc182	Grain yield per plant	GY	375.48	370	380.96	Prasanna et al.[32]
287	QTL287	2	122	2.92842	2.52	umc8-umc55	Kernel number per ear	KN	348.88	315.5	382.26	Prasanna et al.[32]
288	QTL288	2	170	2.04338	2.96	bnl6.29-umc137	Kernel number per ear	KN	500.8	492	509.6	Prasanna et al.[32]
289	QTL289	2	205	2.27983	4.81	umc150-umc344	Kernel number per ear	KN	563.035	526.61	599.46	Prasanna et al.[32]
290	QTL290	10	56	2.88286	6.83	bnl7.49-umc354	Kernel number per ear	KN	403.8	437.6	370	Prasanna et al.[32]
291	QTL291	10	78	2.05423	4.9	umc354-umc182	Kernel number per ear	KN	375.48	370	380.96	Prasanna et al.[32]
292	QTL292	2	166	2.45119	5.76	bnl6.29-umc137(a)	Kernel number per ear	KN	500.8	492	509.6	Prasanna et al.[32]
293	QTL293	7	120	2.32321	5.24	umc80-umc91	Kernel number per ear	KN	528.355	524.71	532	Prasanna et al.[32]
294	QTL294	3	236	2.84816	4.92	umc17-umc96	Ear number per plant	EN	686.295	585.5	787.09	Prasanna et al.[32]
295	QTL295	5	103	5.4295	11.33	bnl6.22-bnl5.71	Ear number per plant	EN	331.85	276.7	387	Prasanna et al.[32]
296	QTL296	10	68	2.06941	3.69	bnl7.49-umc354	Ear number per plant	EN	403.8	437.6	370	Prasanna et al.[32]
297	QTL297	2	166	3.4859	7.34	bnl6.29-umc137	Ear number per plant	EN	500.8	492	509.6	Prasanna et al.[32]
298	QTL298	10	91	3.73536	7.04	umc354-umc182	Ear number per plant	EN	375.48	370	380.96	Prasanna et al.[32]
299	QTL299	3	30	3.69631	3.21	umc313-umc50	Ear height	EH	165.36	96	234.72	Prasanna et al.[32]
300	QTL300	3	111	3.7462	3.34	umc372-bnl8.01	Ear height	EH	417.645	412	423.29	Prasanna et al.[32]
301	QTL301	3	199	6.29067	5.2	umc17-umc96	Ear height	EH	686.295	585.5	787.09	Prasanna et al.[32]
302	QTL302	4	167	2.26247	4.37	umc104-umc133	Ear height	EH	412.35	408.7	416	Prasanna et al.[32]
303	QTL303	8	96	4.37093	6.82	umc120-umc346	Ear height	EH	206.84	202.68	211	Prasanna et al.[32]
304	QTL304	9	127	2.31453	2.51	umc358-bnl14.28	Ear height	EH	496.4	463.9	528.9	Prasanna et al.[32]
305	QTL305	1	174	5.55315	9.56	umc33-umc83	Ear height	EH	710.335	664.17	756.5	Prasanna et al.[32]
306	QTL306	3	29	3.9154	6.71	umc313-umc50	Ear height	EH	165.36	96	234.72	Prasanna et al.[32]
307	QTL307	8	94	2.13883	5.16	umc120-umc346	Ear height	EH	206.84	202.68	211	Prasanna et al.[32]
308	QTL308	8	138	2.43167	5.74	umc89-umc30	Female flowering	FF	397.4	369.6	425.2	Prasanna et al.[32]
309	QTL309	1	188	2.88503	2.08	umc33(a)-umc83	Plant height	PH	710.335	664.17	756.5	Prasanna et al.[32]
310	QTL310	3	29	2.08894	5.54	umc313-umc50	Plant height	PH	165.36	96	234.72	Prasanna et al.[32]
311	QTL311	3	104	2.51627	6.93	umc372-bnl8.01	Plant height	PH	417.645	412	423.29	Prasanna et al.[32]
312	QTL312	3	197	4.14534	2.26	umc39-umc17	Plant height	PH	486.505	483.01	490	Prasanna et al.[32]
313	QTL313	1	183	2.4295	4.32	umc33-umc83	Plant height	PH	710.335	664.17	756.5	Prasanna et al.[32]
314	QTL314	3	230	2.1757	5.24	umc96-umc174	Plant height	PH	789.545	787.09	792	Prasanna et al.[32]
315	QTL315	8	87	2.59653	4.33	umc120-umc346	Plant height	PH	206.84	202.68	211	Prasanna et al.[32]
316	QTL316	1	NA	7.1	22.4	umc164 - umc167	Grain yield	GY	249.305	48.7	449.91	Agrama et al.[33]
317	QTL317	3	NA	5.3	14.8	bnl5.37 - umc96	Grain yield	GY	588.705	390.32	787.09	Agrama et al.[33]
318	QTL318	5	NA	3.2	10.7	bnl6.25 - umc43	Grain yield	GY	167.9	69.5	266.3	Agrama et al.[33]
319	QTL319	5	NA	4.2	13.9	umc126 - umc104	Grain yield	GY	564.85	469.6	660.1	Agrama et al.[33]
320	QTL320	8	NA	3.9	9.5	umc124 - umc93	Grain yield	GY	288.66	176.5	400.82	Agrama et al.[33]
321	QTL321	1	NA	4.6	16.3	umc58 - bnl5.59	Anthesis to silking interval	ASI	548.15	575.9	520.4	Agrama et al.[33]
322	QTL322	3	NA	4.5	15.1	umc60 - umc96	Anthesis to silking interval	ASI	619.895	452.7	787.09	Agrama et al.[33]
323	QTL323	6	NA	3.9	11.2	umc65 - umc62	Anthesis to silking interval	ASI	347.85	181.9	513.8	Agrama et al.[33]
324	QTL324	3	NA	3.1	11.6	umc60 - umc96	Number of ears per plant,	EN	619.895	452.7	787.09	Agrama et al.[33]
325	QTL325	5	NA	5.1	9.4	umc126 - umc104	Number of ears per plant,	EN	564.85	469.6	660.1	Agrama et al.[33]
326	QTL326	6	NA	3.3	19.1	umc46 - umc132	Number of ears per plant,	EN	378.15	312.1	444.2	Agrama et al.[33]
327	QTL327	1	NA	3	14	umc157-psr104	Grain yield	GY	123.2	114.4	132	Rahman et al.[34]
328	QTL328	9	NA	3	46.2	csu29b-csu93	Grain yield	GY	350.295	236.69	463.9	Rahman et al.[34]
329	QTL329	4	145.17	3.86	6.32	NA	Ear length	EL	666.2	660	672.4	Abdelghany et al.[35]
330	QTL330	5	50.9	4.26	7.02	NA	Ear length	EL	228	225.6	230.4	Abdelghany et al.[35]
331	QTL331	3	129.12	4.62	7.63	NA	Ear diameter	ED	546.645	544.92	548.37	Abdelghany et al.[35]
332	QTL332	4	135.74	5.77	9.82	NA	Ear diameter	ED	540.98	538.52	543.44	Abdelghany et al.[35]
333	QTL333	8	65.35	3.72	6.26	NA	Ear diameter	ED	326.2	322.8	329.6	Abdelghany et al.[35]
334	QTL334	1	76.04	5.37	10.35	NA	Ear weight	EW	364.57	353.82	375.32	Abdelghany et al.[35]
335	QTL335	4	145.17	4.1	8.05	NA	Kernel width	KW	669.62	666.64	672.6	Abdelghany et al.[35]
336	QTL336	2	61.51	3.49	6.45	NA	100 kernels weight	KWT	275.1	272.4	277.8	Abdelghany et al.[35]
337	QTL337	7	88.55	6.41	12.14	NA	100 kernels weight	KWT	338.2	336	340.4	Abdelghany et al.[35]
338	QTL338	2	18	2.12364	0.1	umc49a-csu109	Grain yield	GY	626.3	591.5	661.1	Nikoli et al.[36]
339	QTL339	5	7	2.98482	4.51	rgc488-rz508	Grain yield	GY	264.62	250	279.24	Nikoli et al.[36]
340	QTL340	5	18	2.19523	5.31	csu26-php10017	Grain yield	GY	594.75	520.1	669.4	Nikoli et al.[36]
341	QTL341	7	3	2.39696	3.46	csu11-bnlg434	Grain yield	GY	350.07	377.44	322.7	Nikoli et al.[36]
342	QTL342	1	2	2.38612	8.07	bnlg1014-M52/1b	Plant height	PH	113.15	82.8	143.5	Nikoli et al.[36]
343	QTL343	2	1	3.13883	0.6	umc33-sb134a	Plant height	PH	74	68	80	Nikoli et al.[36]
344	QTL344	3	16	2.3449	1.89	rgc122-csu36b	Plant height	PH	292.8	284	301.6	Nikoli et al.[36]
345	QTL345	4	10	2.03905	7.34	cdo497-bnl8.45	Plant height	PH	364.56	303.43	425.69	Nikoli et al.[36]
346	QTL346	5	13	3.00434	12.35	sb854-csu566	Plant height	PH	401.49	332	470.98	Nikoli et al.[36]
347	QTL347	5	17	3.13883	5.09	csu26-php10017	Plant height	PH	594.75	520.1	669.4	Nikoli et al.[36]
348	QTL348	6	1	2.28633	9.58	bnlg1043-bnlg426	Plant height	PH	52.49	20.2	84.78	Nikoli et al.[36]
349	QTL349	2	3	3.31887	0.1	bnlg1327-umc61	Ear height	EH	170.7	148.1	193.3	Nikoli et al.[36]
350	QTL350	2	5	0.032538	0.3	umc61-umc34	Ear height	EH	196.65	193.3	200	Nikoli et al.[36]
351	QTL351	2	9	2.40998	3.11	csu45-umc5(a)	Ear height	EH	485	478	492	Nikoli et al.[36]
352	QTL352	2	12	3.36443	1.02	bnlg108-bcd855	Ear height	EH	247.72	306.3	189.14	Nikoli et al.[36]
353	QTL353	2	14	2.38829	0.09	csu481-npi409	Ear height	EH	326	320	332	Nikoli et al.[36]
354	QTL354	2	18	2.56833	10.55	bnlg1520-csu166	Ear height	EH	631.565	599.13	664	Nikoli et al.[36]
355	QTL355	6	8	3.14967	16.96	psr129b-M54/1C’	Ear height	EH	153.95	147.9	160	Nikoli et al.[36]
356	QTL356	1	1	4.13449	18.88	tub1-bnlg1014	Tassel branch number	TBN	42.64	2.48	82.8	Nikoli et al.[36]
357	QTL357	1	7	2.97614	4.34	blt01.97-umc67	Tassel branch number	TBN	484.3	472	496.6	Nikoli et al.[36]
358	QTL358	2	1	8.12364	5.24	umc53-bnlg1327	Tassel branch number	TBN	99.5	50.9	148.1	Nikoli et al.[36]
359	QTL359	3	3	2.19306	5.12	csu16-MACE01E07	Tassel branch number	TBN	106	96	116	Nikoli et al.[36]
360	QTL360	3	14	4.74187	19.22	umc60a-rgc122	Tassel branch number	TBN	275	266	284	Nikoli et al.[36]
361	QTL361	6	1	2.21475	5.02	bnlg1043-rz143b	Tassel branch number	TBN	26.1	20.2	32	Nikoli et al.[36]
362	QTL362	8	7	4.55315	21.55	csu31b-umc30	Tassel branch number	TBN	420.6	416	425.2	Nikoli et al.[36]
363	QTL363	4	0	3.39	10	umc1109-phi076	100-kernal weight	KWT	709.7	687.8	731.6	Lu et al.[37]
364	QTL364	7	12	4.72	10	phi057-umc1016	100-kernal weight	KWT	139.1	122.4	155.8	Lu et al.[37]
365	QTL365	10	0	7.02	10	umc2067-bnlg640	100-kernal weight	KWT	216.76	195.4	238.12	Lu et al.[37]
366	QTL366	3	6	3.67	10	umc2002-bnlg1035	100-kernal weight	KWT	302	290.6	313.4	Lu et al.[37]
367	QTL367	9	0	4.33	10	bnlg127-bnlg1209	100-kernal weight	KWT	249.755	226.31	273.2	Lu et al.[37]
368	QTL368	3	2	5.18	10	umc2277-bnlg1496	100-kernal weight	KWT	754.2	747.5	760.9	Lu et al.[37]
369	QTL369	3	0	5.21	10	phi036-nc030	100-kernal weight	KWT	163.54	159	168.08	Lu et al.[37]
370	QTL370	10	0	4.25	10	umc1061-umc2122	100-kernal weight	KWT	411.63	392.5	430.76	Lu et al.[37]
371	QTL371	10	0	3.13	10	bnlg1451-phi052	100-kernal weight	KWT	90.83	81.1	100.56	Lu et al.[37]
372	QTL372	8	0	7.36	10	phi080-umc1069	100-kernal weight	KWT	573.265	571.5	575.03	Lu et al.[37]
373	QTL373	3	4	5.22	10	nc030-phi029	Kernal weight per plant	KWE	170.04	168.08	172	Lu et al.[37]
374	QTL374	4	4	4.68	10	umc2365-phi093	Kernal weight per plant	KWE	498.9	475.7	522.1	Lu et al.[37]
375	QTL375	5	14	3.83	10	umc2036-umc1587	Kernal weight per plant	KWE	140.8	124.7	156.9	Lu et al.[37]
376	QTL376	7	2	5.88	10	umc1426-bnlg2132	Kernal weight per plant	KWE	50.55	47.8	53.3	Lu et al.[37]
377	QTL377	10	0	5.95	10	bnlg1716-umc2067	Kernal weight per plant	KWE	193.06	190.72	195.4	Lu et al.[37]
378	QTL378	2	4	4.71	10	phi083-umc2032	Kernal weight per plant	KWE	267.9	251.1	284.7	Lu et al.[37]
379	QTL379	4	16	5.23	10	umc2082-umc2176	Kernal weight per plant	KWE	158.1	141.6	174.6	Lu et al.[37]
380	QTL380	6	6	4.31	10	bnlg391-umc1178	Kernal weight per plant	KWE	112.74	98.4	127.08	Lu et al.[37]
381	QTL381	4	12	7.66	10	umc2287-umc1989	Kernal weight per plant	KWE	583.075	566.52	599.63	Lu et al.[37]
382	QTL382	7	0	4.78	10	bnlg1305-bnlg339	Kernal weight per plant	KWE	323.77	302.88	344.66	Lu et al.[37]
383	QTL383	2	0	6.65	10	umc1003-umc1635	Kernal number per row	NKR	344.7	345	344.4	Lu et al.[37]
384	QTL384	4	6	4.9	10	umc2365-phi093	Kernal number per row	NKR	498.9	475.7	522.1	Lu et al.[37]
385	QTL385	5	10	5.86	10	umc2036-umc1587	Kernal number per row	NKR	140.8	124.7	156.9	Lu et al.[37]
386	QTL386	7	0	4.77	10	umc1426-bnlg2132	Kernal number per row	NKR	50.55	47.8	53.3	Lu et al.[37]
387	QTL387	8	2	3.51	10	phi080-umc1069	Kernal number per row	NKR	573.265	571.5	575.03	Lu et al.[37]
388	QTL388	1	2	5.77	10	umc1590-umc2151	Kernal number per row	NKR	540.45	517	563.9	Lu et al.[37]
389	QTL389	5	0	4.73	10	bnlg278-phi048	Kernal number per row	NKR	481.63	426.66	536.6	Lu et al.[37]
390	QTL390	1	10	5.07	10	umc1774-phi26545	Kernal number per row	NKR	956.18	939.36	973	Lu et al.[37]
391	QTL391	4	0	4.06	10	phi079-phi026	Kernal number per row	NKR	247.17	240.34	254	Lu et al.[37]
392	QTL392	3	8	5.83	10	phi10228-bnlg1350	Kernal number per row	NKR	423.26	406.8	439.72	Lu et al.[37]
393	QTL393	3	2	4.87	10	umc2081-bnlg1257	Kernal number per row	NKR	673.945	627.1	720.79	Lu et al.[37]
394	QTL394	4	2	5.29	10	bnlg292-umc1173	Kernal number per row	NKR	587.855	573.71	602	Lu et al.[37]
395	QTL395	8	0	3.79	10	phi065-umc1741	Kernal number per row	NKR	192.245	175.9	208.59	Lu et al.[37]
396	QTL396	4	6	6.67	10	umc2287-umc1989	Kernal number per row	NKR	583.075	566.52	599.63	Lu et al.[37]
397	QTL397	7	0	3.76	10	bnlg1380-bnlg1792	Kernal number per row	NKR	189.25	188.1	190.4	Lu et al.[37]
398	QTL398	7	0	5.33	10	umc1103-umc2197	Kernal number per row	NKR	540.755	493.59	587.92	Lu et al.[37]
399	QTL399	1	6	6.83	10	bnlg1014-phi42791	Ear length	EL	85.4	82.8	88	Lu et al.[37]
400	QTL400	3	0	4.84	10	umc2256-phi10412	Ear length	EL	26.7	23.4	30	Lu et al.[37]
401	QTL401	3	2	5.92	10	bnlg1452-umc1504	Ear length	EL	209.5	190.8	228.2	Lu et al.[37]
402	QTL402	5	6	3.25	10	umc2036-umc1587	Ear length	EL	140.8	124.7	156.9	Lu et al.[37]
403	QTL403	8	2	6.45	10	phi080-umc2067	Ear length	EL	383.45	571.5	195.4	Lu et al.[37]
404	QTL404	10	8	4.13	10	bnlg1716-umc2067	Ear length	EL	193.06	190.72	195.4	Lu et al.[37]
405	QTL405	3	4	3.35	10	umc2166-umc1539(bnlg594)	Ear length	EL	389.375	388.04	390.71	Lu et al.[37]
406	QTL406	5	12	3.06	10	umc1792(prp16)-umc1829	Ear length	EL	648.665	625.8	671.53	Lu et al.[37]
407	QTL407	3	0	4.72	10	phi047(mybr17)-umc1136(c3h48)	Ear length	EL	791.35	759.9	822.8	Lu et al.[37]
408	QTL408	10	0	6.09	10	phi059(aasr1)-umc2069	Ear length	EL	149.7	143.5	155.9	Lu et al.[37]
409	QTL409	4	2	4.72	10	umc1173-umc2287	Ear length	EL	610.05	602	618.1	Lu et al.[37]
410	QTL410	9	102.91	3.97	13.82	bnlg1525	Grain yield	GY	519.02	510.826	527.214	Xiao et al.[38]
411	QTL411	1	90.51	2.76	4.42	umc1122	100-kernel weight	KWT	664	638.378	689.622	Xiao et al.[38]
412	QTL412	2	20.21	4.2	6.74	umc1003	100-kernel weight	KWT	345	328.198	361.802	Xiao et al.[38]
413	QTL413	3	22.01	3.22	6.15	bnlg1144	100-kernel weight	KWT	77	58.5857	95.4143	Xiao et al.[38]
414	QTL414	3	166.51	2.54	4.31	bnlg1754	100-kernel weight	KWT	757	730.724	783.276	Xiao et al.[38]
415	QTL415	8	129.61	4.19	6.53	umc1933	100-kernel weight	KWT	540.3	522.957	557.643	Xiao et al.[38]
416	QTL416	1	11.51	2.99	5.62	bnlg1429	Kernel number per ear	KN	143.5	123.349	163.651	Xiao et al.[38]
417	QTL417	9	96.91	3.67	10.09	umc1657	Kernel number per ear	KN	344.8	333.576	356.024	Xiao et al.[38]
418	QTL418	1	90.51	5.64	9.09	umc1122	Cob weight per ear	CWE	664	651.541	676.459	Xiao et al.[38]
419	QTL419	3	160.51	2.66	5.73	bnlg1754	Cob weight per ear	CWE	757	737.236	776.764	Xiao et al.[38]
420	QTL420	5	84.81	4.19	6.86	phi100(umc51a)	Cob weight per ear	CWE	493.7	477.192	510.208	Xiao et al.[38]
421	QTL421	7	81.21	2.6	4.08	umc1944	Cob weight per ear	CWE	466.84	439.083	494.597	Xiao et al.[38]
422	QTL422	9	82.11	4.91	7.85	umc1492	Cob weight per ear	CWE	308	293.574	322.426	Xiao et al.[38]
423	QTL423	9	121.21	2.7	4.21	bnlg1525	Cob weight per ear	CWE	519.02	492.12	545.92	Xiao et al.[38]
424	QTL424	8	64.21	2.87	5.2	phi115	Kernel weight per ear	KWE	275.04	253.262	296.818	Xiao et al.[38]
425	QTL425	1	27.11	2.89	5.25	bnlg176	Ear weight	EW	208.6	187.029	230.171	Xiao et al.[38]
426	QTL426	2	12.21	2.93	6.1	bnlg1064	Ear weight	EW	227.1	208.535	245.665	Xiao et al.[38]
427	QTL427	1	16.11	3.79	7.23	umc1429	Ear number per plant	EN	286.6	270.936	302.264	Xiao et al.[38]
428	QTL428	9	104.91	8.37	31.28	bnlg1525	Ear number per plant	EN	519.02	515.4	522.64	Xiao et al.[38]
429	QTL429	1	10.5	3.19	7	bnlg176-p66M46260	Grain yield	GY	231.255	208.6	253.91	Hao et al.[39]
430	QTL430	3	3.6	2.65	5.6	p66M37415-bnlg1754	Grain yield	GY	744.5	732	757	Hao et al.[39]
431	QTL431	1	12.4	7.27	16.3	p64M47178-P64M46270	Anthesis to silking interval	ASI	415.9	401.2	430.6	Hao et al.[39]
432	QTL432	3	5.9	2.71	5.3	bnlg1144-bnlg1523	Anthesis to silking interval	ASI	77.345	77	77.69	Hao et al.[39]
433	QTL433	3	7.1	2.81	6	p66M36130-umc1539(sep1)	Anthesis to silking interval	ASI	380.65	371	390.3	Hao et al.[39]
434	QTL434	9	4.5	5.54	11.3	umc1037-phi022	Anthesis to silking interval	ASI	177.1	162.5	191.7	Hao et al.[39]
435	QTL435	9	3.3	5.71	10.9	P55M53420-P66M22365	Anthesis to silking interval	ASI	91.25	82	100.5	Hao et al.[39]
436	QTL436	1	21.2	3.23	7.3	bnlg176-p66M46260	Anthesis to silking interval	ASI	231.255	208.6	253.91	Hao et al.[39]
437	QTL437	2	5.8	4.64	10.6	phi127-p64M47622	Anthesis to silking interval	ASI	470.58	451.16	490	Hao et al.[39]
438	QTL438	3	9.5	4.32	8.8	bnlg1754-p66M46220	Anthesis to silking interval	ASI	766.5	757	776	Hao et al.[39]
439	QTL439	1	10.5	2.58	5.1	bnlg176-p66M46260	ear setting percentage	ES	231.255	208.6	253.91	Hao et al.[39]
440	QTL440	5	15.6	6.93	43.8	p66M46250-phi101(umc51a)	ear setting percentage	ES	482.85	472	493.7	Hao et al.[39]
441	QTL441	9	46.9	4.55	32.1	umc1040-bnlg244	ear setting percentage	ES	81.9	21.2	142.6	Hao et al.[39]
442	QTL442	9	17	4.14	11.9	phi027-bnlg1209	ear setting percentage	ES	232.45	191.7	273.2	Hao et al.[39]
443	QTL443	1	10.5	3.11	6.2	bnlg176-p66M46260	ear setting percentage	ES	231.255	208.6	253.91	Hao et al.[39]
444	QTL444	6	13.8	2.66	7.3	p66M46490-phi299852(umc1296)	ear setting percentage	ES	436.85	423	450.7	Hao et al.[39]
445	QTL445	8	3.4	2.66	6.2	phi015(gst1)-phi233376	ear setting percentage	ES	590.3	571.5	609.1	Hao et al.[39]
446	QTL446	10	86.1	2	10.86	umc1381-umc1053	Grain yield	GY	229.6	187	272.2	Peng et al.[40]
447	QTL447	10	91.3	2	19.2	phi062-umc1115	Grain yield	GY	278.2	260.5	295.9	Peng et al.[40]
448	QTL448	10	87.1	2	7.33	umc1053-phi062	Kernel number per ear	KN	266.35	272.2	260.5	Peng et al.[40]
449	QTL449	2	0	2	11.67	umc1419-phi098	1000 kernel weight	KWT	30.16	3.6	56.72	Peng et al.[40]
450	QTL450	10	95.3	2	5.87	phi062-umc1115	1000 kernel weight	KWT	278.2	260.5	295.9	Peng et al.[40]
451	QTL451	10	222.6	2	11.98	umc2172-bnlg1185	1000 kernel weight	KWT	515.45	480	550.9	Peng et al.[40]
452	QTL452	4	226.3	2	12.14	bnlg572-umc1820	Ear length	KL	632.96	647.82	618.1	Peng et al.[40]
453	QTL453	9	58.9	2	13.05	umc1170-umc1764	Ear length	KL	116.1	101.1	131.1	Peng et al.[40]
454	QTL454	2	1	2	12.41	umc1419-phi098	Kernel thickness	KT	30.16	3.6	56.72	Peng et al.[40]
455	QTL455	4	208.6	2.59	8.59	phi078-bnlg598	Plant height	PH	331.75	323.5	340	Li et al.[41]
456	QTL456	7	35.5	2.72	11.22	phi034-bnlg1793	Plant height	PH	186.4	172.8	200	Li et al.[41]
457	QTL457	1	107.7	3.23	7.26	bnlg2086-bnlg1811	Anthew-silking interval	ASI	393.8	401.2	386.4	Li et al.[41]
458	QTL458	4	83.2	2.74	10.98	nc005(gpc1)-umc2281	Anthew-silking interval	ASI	206.3	254	158.6	Li et al.[41]
459	QTL459	4	131.4	2.52	11.24	umc1051-umc1418	Anthew-silking interval	ASI	582.095	530.19	634	Li et al.[41]
460	QTL460	5	45.5	2.63	6.74	bnlg1836(a)-bnlg105(a)	Anthew-silking interval	ASI	135.05	87.56	182.54	Li et al.[41]
461	QTL461	7	76	2.97	15.7	bnlg1805-umc1015	Anthew-silking interval	ASI	346.05	392.1	300	Li et al.[41]
462	QTL462	4	165.7	2.86	18.19	umc1503-umc1573	Grain yield per plant	GY	655.47	666.64	644.3	Li et al.[41]
463	QTL463	6	NA	11.7	38.7	npi280	Grain yield	GY	413.28	408.715	619.92	Veldboom et al.[42]
464	QTL464	1	NA	2.37	7.7	npi236	Kernel weigh	KWE	675.6	652.656	1013.4	Veldboom et al.[42]
465	QTL465	2	NA	3.94	11.7	isu117	Kernel weigh	KWE	430	414.9	645	Veldboom et al.[42]
466	QTL466	3	NA	5.14	23.8	umc121(bzip117)	Kernel weigh	KWE	54.3	46.877	81.45	Veldboom et al.[42]
467	QTL467	4	NA	4.8	13.5	npi410	Kernel weigh	KWE	520.1	507.014	780.15	Veldboom et al.[42]
468	QTL468	5	NA	3.03	10.7	bnl10.06	Kernel weigh	KWE	284.15	267.639	426.225	Veldboom et al.[42]
469	QTL469	6	NA	5.12	19.7	bnl5.47(a)	Kernel weigh	KWE	344.51	335.542	516.765	Veldboom et al.[42]
470	QTL470	8	NA	3.33	12.4	npi268(a)	Kernel weigh	KWE	459.2	444.953	688.8	Veldboom et al.[42]
471	QTL471	3	NA	7.47	24.4	umc165A	Ear number per plant	EN	423.29	416.05	634.935	Veldboom et al.[42]
472	QTL472	6	NA	5.3	20.4	bnl5.47	Ear number per plant	EN	344.51	335.85	516.765	Veldboom et al.[42]
473	QTL473	1	NA	2.73	8.5	npi234	Ear length	EL	219	198.216	328.5	Veldboom et al.[42]
474	QTL474	5	NA	2.68	14.5	umc27	Ear length	EL	217.08	204.896	325.62	Veldboom et al.[42]
475	QTL475	6	NA	11.18	39.5	npi280	Ear length	EL	413.28	408.807	619.92	Veldboom et al.[42]
476	QTL476	1	NA	5.87	18.2	umc37	Ear diamete	ED	1044	1034.29	1566	Veldboom et al.[42]
477	QTL477	2	NA	7.64	26.4	isu117	Ear diamete	ED	430	423.308	645	Veldboom et al.[42]
478	QTL478	6	NA	5.61	19.7	npi280	Ear diamete	ED	413.28	404.312	619.92	Veldboom et al.[42]
479	QTL479	7	NA	4.05	11.8	bnl8.37	Ear diamete	ED	455.1	440.128	682.65	Veldboom et al.[42]
480	QTL480	8	NA	3.38	9.7	umc165B	Ear diamete	ED	464.02	445.807	696.03	Veldboom et al.[42]
481	QTL481	1	NA	3.19	14.2	umc157	Cob diamete	CD	114.4	101.959	171.6	Veldboom et al.[42]
482	QTL482	1	NA	6.58	20.5	bnl7.08(b)	Cob diamete	CD	657.2	648.582	985.8	Veldboom et al.[42]
483	QTL483	2	NA	9.42	26.9	isu117	Cob diamete	CD	430	423.432	645	Veldboom et al.[42]
484	QTL484	7	NA	5.66	18.4	bnl15.21	Cob diamete	CD	309.9	300.299	464.85	Veldboom et al.[42]
485	QTL485	8	NA	2.28	6.9	umc165B	Cob diamete	CD	464.02	438.416	696.03	Veldboom et al.[42]
486	QTL486	1	NA	2.65	9.9	umc157	Kernel depth	KL	114.4	96.5549	171.6	Veldboom et al.[42]
487	QTL487	2	NA	2.77	10.9	isu117	Kernel depth	KL	430	413.792	645	Veldboom et al.[42]
488	QTL488	3	NA	3.17	15.8	umc121	Kernel depth	KL	54.3	43.1186	81.45	Veldboom et al.[42]
489	QTL489	6	NA	8.3	26.2	npi280	Kernel depth	KL	413.28	406.537	619.92	Veldboom et al.[42]
490	QTL490	2	NA	9.52	35	umc78	Kernel row number	NRE	160	154.952	240	Veldboom et al.[42]
491	QTL491	4	NA	5.6	16.7	php10025	Kernel row number	NRE	579.8	569.221	869.7	Veldboom et al.[42]
492	QTL492	1	34	3.19	11.7	bnlg176 (38)	Drought tolerance index	DTI	208.6	195.355	221.845	Tuberosa et al.[43]
493	QTL493	1	92	13.82	41.7	PGAMCTA205 (92)	Drought tolerance index	DTI	500	496.284	503.716	Tuberosa et al.[43]
494	QTL494	1	126	6.44	22.2	umc128 (128)	Drought tolerance index	DTI	722.4	715.419	729.381	Tuberosa et al.[43]
495	QTL495	2	74	2.89	10.7	umc131 (74)	Drought tolerance index	DTI	342.4	327.917	356.883	Tuberosa et al.[43]
496	QTL496	8	68	2.62	9.7	bnlg240 (71)	Drought tolerance index	DTI	423.72	407.744	439.696	Tuberosa et al.[43]
497	QTL497	10	62	3.09	11.3	PGAMCTT250 (64)	Drought tolerance index	DTI	182	168.286	195.714	Tuberosa et al.[43]
498	QTL498	1	92	16.37	47.2	PGAMCTA205 (92)	Grain yield	GY	500	496.717	503.283	Tuberosa et al.[43]
499	QTL499	1	130	6.79	23.3	csu2d (131)	Grain yield	GY	736	729.349	742.651	Tuberosa et al.[43]
500	QTL500	2	72	2.95	10.9	umc131 (74)	Grain yield	GY	342.4	328.182	356.618	Tuberosa et al.[43]
501	QTL501	4	14	2.72	10.6	umc66a (8)	Grain yield	GY	397.4	382.78	412.02	Tuberosa et al.[43]
502	QTL502	8	72	2.55	9.5	bnlg240 (71)	Grain yield	GY	423.72	407.407	440.033	Tuberosa et al.[43]
503	QTL503	10	62	3.61	13.1	PGAMCTT250 (64)	Grain yield	GY	182	170.17	193.83	Tuberosa et al.[43]
504	QTL504	2	NA	2.27	6.4	phi96100-umc1265	Grain yield	ASI	53.85	30	77.7	Li et al.[44]
505	QTL505	5	NA	2.45	7.2	phi311888-umc1019	Grain yield	ASI	396.6	323.6	469.6	Li et al.[44]
506	QTL506	3	NA	2.14	11.6	umc1970-phi104127	Ear setting	ES	38	28.2	38	Li et al.[44]
507	QTL507	3	NA	2.35	10.7	bnlg1350-bnlg197	Ear setting	ES	511.5	439.72	511.5	Li et al.[44]
508	QTL508	7	NA	2.74	25.4	umc1545-umc1066	Ear setting	ES	122.4	5.5	122.4	Li et al.[44]
509	QTL509	10	NA	2.19	12.7	bnlg292c-umc1196	Ear setting	ES	390.71	336.62	444.8	Li et al.[44]
510	QTL510	1	NA	2.48	11.5	umc1596-phi011	Grain yield	GY	711.5	583.7	839.3	Li et al.[44]
511	QTL511	2	NA	3.38	14.6	bnlg1555-umc1560	Grain yield	GY	368.1	261.1	475.1	Li et al.[44]
512	QTL512	4	NA	2.49	14.4	bnlg1621-bnlg490	Grain yield	GY	293.71	349.62	237.8	Li et al.[44]
513	QTL513	8	NA	2.43	9	umc1858-phi014	Grain yield	GY	303.85	312.4	295.3	Li et al.[44]
514	QTL514	8	NA	2.4	22	phi119-umc1663	Grain yield	GY	369.09	130.08	608.1	Li et al.[44]
515	QTL515	1	154	5.25	11.8	umc119(a)	Grain yield	GY	575.9	566.303	585.497	Ribaut et al.[45]
516	QTL516	4	14	2.71	5.7	umc123	Grain yield	GY	24.6	4.73195	44.468	Ribaut et al.[45]
517	QTL517	10	59	2.79	6.8	umc64	Grain yield	GY	242.3	225.646	258.954	Ribaut et al.[45]
518	QTL518	1	82	2.51	5	umc53b	Grain yield	GY	420.56	397.91	443.21	Ribaut et al.[45]
519	QTL519	4	114	2.69	5.1	umc104a	Grain yield	GY	408.7	386.495	430.905	Ribaut et al.[45]
520	QTL520	10	60	4.64	10.1	umc64	Grain yield	GY	242.3	231.087	253.513	Ribaut et al.[45]
521	QTL521	1	82	2.73	5.6	umc53b	Grain yield	GY	420.56	400.337	440.783	Ribaut et al.[45]
522	QTL522	1	156	4.01	7.7	umc119	Grain yield	GY	575.9	561.192	590.608	Ribaut et al.[45]
523	QTL523	8	73	2.6	4.5	umc120a	Grain yield	GY	202.68	177.514	227.846	Ribaut et al.[45]
524	QTL524	10	61	4.1	9.8	csu86	Grain yield	GY	288.94	277.384	300.496	Ribaut et al.[45]
525	QTL525	1	65	2.54	6.2	umc11	Ear number	EN	218.8	200.534	237.066	Ribaut et al.[45]
526	QTL526	3	44	3.1	7.3	umc50(a)	Ear number	EN	234.72	219.207	250.233	Ribaut et al.[45]
527	QTL527	9	69	2.76	5.8	umc114	Ear number	EN	254.3	234.775	273.825	Ribaut et al.[45]
528	QTL528	1	77	2.66	5.8	umc11	Ear number	EN	218.8	199.275	238.325	Ribaut et al.[45]
529	QTL529	1	73	2.51	4.5	umc11	Ear number	EN	218.8	193.634	243.966	Ribaut et al.[45]
530	QTL530	9	69	2.71	7.2	umc114	Ear number	EN	254.3	238.571	270.029	Ribaut et al.[45]
531	QTL531	1	158	4.3	11.1	umc119	Kernel number	KN	575.9	565.697	586.103	Ribaut et al.[45]
532	QTL532	3	87	3.65	12.9	bnl8.01	Kernel number	KN	423.29	414.511	432.069	Ribaut et al.[45]
533	QTL533	4	10	3.12	7.7	umc123	Kernel number	KN	24.6	9.89249	39.3075	Ribaut et al.[45]
534	QTL534	9	62	3.01	7.3	bnl3.06	Kernel number	KN	184.1	168.587	199.613	Ribaut et al.[45]
535	QTL535	9	75	2.68	7.3	umc114	Kernel number	KN	254.3	238.787	269.813	Ribaut et al.[45]
536	QTL536	10	54	2.65	5.6	umc64	Kernel number	KN	242.3	222.077	262.523	Ribaut et al.[45]
537	QTL537	1	158	3.44	7.6	umc119	Kernel number	KN	575.9	560.999	590.801	Ribaut et al.[45]
538	QTL538	4	18	2.8	6.1	umc123	Kernel number	KN	24.6	6.03478	43.1652	Ribaut et al.[45]
539	QTL539	9	72	2.81	6.6	umc114	Kernel number	KN	254.3	237.141	271.459	Ribaut et al.[45]
540	QTL540	10	56	3.05	5.5	umc64	Kernel number	KN	242.3	221.709	262.891	Ribaut et al.[45]
541	QTL541	2	2.07	4.67	13.19	bnlg2077-umc2205	Anthesis silking interval	ASI	455.4	474.8	436	Zhu et al.[46]
542	QTL542	9	9.07	3.08	8.8	umc1714-umc1505	Anthesis silking interval	ASI	601.25	567.3	635.2	Zhu et al.[46]
543	QTL543	2	2.07	4.67	13.84	bnlg2077-umc2205	Anthesis silking interval	ASI	455.4	474.8	436	Zhu et al.[46]
544	QTL544	8	8.06	3.11	9.26	umc1149-umc1268	Anthesis silking interval	ASI	454.3	413.9	494.7	Zhu et al.[46]
545	QTL545	1	1.03	4.37	12.17	bnlg1866-umc2227	Grain yield	GY	325.5	290.1	360.9	Zhu et al.[46]
546	QTL546	4	4.05	6.26	15.64	umc1896-bnlg1621	Grain yield	GY	337.81	326	349.62	Zhu et al.[46]
547	QTL547	8	8.07	3.39	8.83	umc1268-bnlg1056	Grain yield	GY	522.55	494.7	550.4	Zhu et al.[46]
548	QTL548	9	9.04	4.51	7.05	umc2121-umc1387	Grain yield	GY	322.24	315.7	328.78	Zhu et al.[46]
549	QTL549	1	1.03	4.12	11.72	bnlg1866-umc2227	Grain yield	GY	325.5	290.1	360.9	Zhu et al.[46]
550	QTL550	4	4.05	5.96	14.29	umc1896-bnlg1621	Grain yield	GY	337.81	326	349.62	Zhu et al.[46]
551	QTL551	6	6.01	3.76	9.15	bnlg1538-umc1257	Grain yield	GY	126.51	107.32	145.7	Zhu et al.[46]
552	QTL552	1	1.06	5.22	7.67	umc1035-umc1988	Plant height	PH	546.7	587	506.4	Zhu et al.[46]
553	QTL553	2	2.07	5.94	8.98	bnlg2077-umc2205	Plant height	PH	455.4	474.8	436	Zhu et al.[46]
554	QTL554	8	8.01	4.48	8.27	umc1327-bnlg2037	Plant height	PH	83.75	55	112.5	Zhu et al.[46]
555	QTL555	1	1.06	5.13	7.89	umc1035-umc1988	Plant height	PH	546.7	587	506.4	Zhu et al.[46]
556	QTL556	2	2.07	5.32	8.63	bnlg2077-umc2205	Plant height	PH	455.4	474.8	436	Zhu et al.[46]
557	QTL557	10	10.08	4.52	8.34	umc1677-bnlg028	Plant height	PH	328.1	311.4	344.8	Zhu et al.[46]
558	QTL558	2	2.05	3.32	7.58	umc2032-bnlg2328	Ear height	EH	425.16	284.7	565.62	Zhu et al.[46]
559	QTL559	4	4.03	5.02	14.7	umc2039-umc2176	Ear height	EH	185.5	196.4	174.6	Zhu et al.[46]
560	QTL560	4	4.03	4.86	13.9	umc2039-umc2176	Ear height	EH	185.5	196.4	174.6	Zhu et al.[46]
561	QTL561	10	10.04	3.55	7.41	bnlg1716-umc155	Ear height	EH	208.41	190.72	226.1	Zhu et al.[46]
562	QTL562	3	3.01	3.92	8.34	umc2256-umc1886	Ear setting	ES	50.95	23.4	78.5	Zhu et al.[46]
563	QTL563	9	9.05	4.63	14.73	umc1387-umc1191	Ear setting	ES	280.79	328.78	232.8	Zhu et al.[46]
564	QTL564	2	2.03	4.72	13.12	umc1633-bnlg2077	Ear setting	ES	511.65	548.5	474.8	Zhu et al.[46]
565	QTL565	3	3.01	3.74	9.56	umc2256-umc1886	Ear setting	ES	50.95	23.4	78.5	Zhu et al.[46]
566	QTL566	1	18.8	3.99	6.89	PZE-101005831–PUT-163a-86470789–4503	Days to silk	FF	50.89	37.78	64	Tang et al.[9]
567	QTL567	2	68.3	3.24	7.18	PZE-102032169–SYN9947	Anthesis silking interval	ASI	170	164	176	Tang et al.[9]
568	QTL568	3	196.6	4.27	7.3	PZE-103125352–PZE-103127310	Days to silk	FF	470.76	463.8	477.72	Tang et al.[9]
569	QTL569	3	223.3	2.96	7.6	SYN8758–SYN4285	Anthesis silking interval	ASI	775.35	759.9	790.8	Tang et al.[9]
570	QTL570	5	55.3	2.6	3.98	SYN906–SYN11580	Days to anthesis	FD	178.74	168.28	189.2	Tang et al.[9]
571	QTL571	6	139.1	5.29	9.01	PUT-163a-148949704–504–SYN30498	Days to silk	FF	442	440	444	Tang et al.[9]
572	QTL572	6	139.1	3.76	8.32	PUT-163a-148949704–504–SYN32868	Anthesis silking interval	ASI	444	440	448	Tang et al.[9]
573	QTL573	8	77.5	17.35	32.61	PZE-108069804–PZE-108071041	Days to anthesis	FD	337.6	336	339.2	Tang et al.[9]
574	QTL574	8	78.7	12.36	25.52	PZE-108069898–PZE-108072786	Days to silk	FF	343	336.8	349.2	Tang et al.[9]
