# Supplementary material for: Meta-Quantitative Trait Loci Analysis and Candidate Gene Mining for Drought Tolerance-Associated Traits in Maize (Zea mays L.)
Source: Int J Mol Sci. 2024 Apr 12;25(8):4295. doi: 10.3390/ijms25084295 (PMC11049847; doi:10.3390/ijms25084295)
Supplement: Supplementary file 1 [file ijms-25-04295-s001.zip › Table S3.xlsx]

## Sheet: Sheet1
Table S3. Different trait under drought stress and corresponding numbers of QTL used for the study
No.	Trait	Trait abbreviation	No. of QTL involved	Category	Abbreviation of trait category
1	1000 kernel weight	KWT	38	Grain yield component traits	GY
1	100 kernels weight	KWT		Grain yield component traits	GY
1	50 Kernel weight	KWT		Grain yield component traits	GY
2	Grain yield	GY	59	Grain yield component traits	GY
2	Kernel yield per plot	GY		Grain yield component traits	GY
2	Grain yield per plant	GY		Grain yield component traits	GY
2	Grain yield per plant	GY		Grain yield component traits	GY
3	Ear number	EN	17	Grain yield component traits	GY
3	Ear number per plant	EN		Grain yield component traits	GY
3	Number of ears per plant	EN		Grain yield component traits	GY
4	Ear length	EL	25	Grain yield component traits	GY
5	Kernel length	KL	5	Grain yield component traits	GY
5	Seed length	KL		Grain yield component traits	GY
5	Kernel depth	KL		Grain yield component traits	GY
6	Kernel width	KW	11	Grain yield component traits	GY
7	Kernel thickness	KT	3	Grain yield component traits	GY
8	Ear weight	EW	18	Grain yield component traits	GY
9	Kernel number	KN	25	Grain yield component traits	GY
9	Kernel number per ear	KN		Grain yield component traits	GY
10	Kernel weight	KWE	29	Grain yield component traits	GY
10	Kernel weight per ear	KWE		Grain yield component traits	GY
10	Kernel weight per plant	KWE		Grain yield component traits	GY
10	Grain weight per spike	KWE		Grain yield component traits	GY
10	Seed weight	KWE		Grain yield component traits	GY
11	Kernel row number	NRE	14	Grain yield component traits	GY
11	Kernel rows per ear	NRE		Grain yield component traits	GY
11	Number of rows per ear	NRE		Grain yield component traits	GY
11	Rows of ear	NRE		Grain yield component traits	GY
12	Number of kernels per row	NKR	28	Grain yield component traits	GY
12	Kernel number per row	NKR		Grain yield component traits	GY
13	Cob weight	CWE	9	Grain yield component traits	GY
13	Cob weight per ear	CWE		Grain yield component traits	GY
14	Cob diameter	CD	2	Grain yield component traits	GY
15	Ear diameter	ED	8	Grain yield component traits	GY
16	Ear setting percentage	ES	15	Grain yield component traits	GY
total			306
17	Anthesis to silking interval	ASI	54	Flowering time-related traits	FR
18	Number of days tasseling	MF		Flowering time-related traits	FR
18	Male flowering	MF		Flowering time-related traits	FR
18	Male flowering time	MF	28	Flowering time-related traits	FR
19	Flowering days	FD	4	Flowering time-related traits	FR
20	Spinning days	FF		Flowering time-related traits	FR
20	Female flowering time	FF		Flowering time-related traits	FR
20	Female flowering	FF	29	Flowering time-related traits	FR
21	Tassel branch number	TBN	7	Flowering time-related traits	FR
total			122
22	Plant height	PH	45	Plant morphology traits	PM
23	Ear height	EH	15	Plant morphology traits	PM
total			60
24	Drought tolerance index	DTI	23	Drought tolerance index	DTI
total			23
sum			511
