# Supplementary material for: Meta-Quantitative Trait Loci Analysis and Candidate Gene Mining for Drought Tolerance-Associated Traits in Maize (Zea mays L.)
Source: Int J Mol Sci. 2024 Apr 12;25(8):4295. doi: 10.3390/ijms25084295 (PMC11049847; doi:10.3390/ijms25084295)
Supplement: Supplementary file 1 [file ijms-25-04295-s001.zip › Table S4.xlsx]

## Sheet: Sheet1
Table S4. Meta-QTL associated with drought tolerance and number of candidate genes within identified MQTL
No.	MQTL	Chr	CI(95%)	Flanking markers	Position(cM)	Left physical position (bp)	Right physical position (bp)	No. of original QTLs	Trait associated	No. of candidate genes	Drought-tolerant genes
1	MQTL1_1	1	4.44	pco082302-lls1	96.15	9015345	10265855	15	KWT, GY, KN, PH, KL, TBN, CD	30	ZmLBD2[60]
2	MQTL1_2	1	6.56	pco113850-adf5	204.25	31351458	33150346	14	FF, KWT, EN, ASI, EL, ES, DTI, EN, PH, EW, GY	25
3	MQTL1_3	1	9.72	IDP7785-c3h45	314.01	53183379	54756798	8	GY, EW, ASI, EN, EL, DTI	17	ZmCIPK3[50]
4	MQTL1_4	1	9	pza00752-uce16	399.49	83647801	84851294	11	ASI, MF, GY, EW, DTI, KWT, FF, KWE	21
5	MQTL1_5	1	4.77	yab11-prp5	499.22	177577710	179967167	7	EW, GY, TBN, DTI, KWT, KWE	15	ZmNF-YA3[61]
6	MQTL1_6	1	9.62	IDP7280-pap15	573.07	195612478	197700005	11	GY, MF, PH, KN, GY, ASI, NKR	29
7	MQTL1_7	1	12.53	pco103958-bhlh42	665.57	214671368	217296215	11	FF, SDW, PH, GY, ASI, EH, KWT, SFW, CWE	25	ZmEREBP60[62]
8	MQTL1_8	1	3.22	IDP1982-ckx6	724.22	232182349	233551762	13	FF, DTI, SDW, GY, EH, MF, SFW, PH, ASI	30
9	MQTL1_9	1	6.82	IDP437-IDP7685	863.4	267434894	267654312	13	ASI, FF, KW, CWE, EW, KN, KWE, NRE, NKR	6
10	MQTL2_1	2	16.41	ast91-cl34132_1a	73.94	4861458	5781446	7	MF, KT, ASI, KWT, ASI, TBN, KW	36
11	MQTL2_2	2	16.29	morf2-csu425(gct)	148.25	12406436	14100162	4	PH, NRE, KW, TBN	28
12	MQTL2_3	2	5.27	dbb1-mmp167	273.91	35306395	41787090	4	EW, KWE, KWT, EH	16
13	MQTL2_4	2	6.65	gras51-IDP267	306.09	47859916	50706825	4	EH, KW, EL	19
14	MQTL2_5	2	0.6	umc1007-zpu1	344.66	83750412	111775606	6	GY, MF, KN, SW, DTI, KWT	19
15	MQTL2_6	2	1.67	hma3-pco080190	374.85	163038225	169452918	4	GY, KWE, KN, MF	25
16	MQTL2_7	2	21.37	IDP4853-nbcs6	456.35	202423940	206933192	5	ASI, PH	30
17	MQTL2_8	2	5.66	chr119-aprl2	473.1	207695606	209135945	9	ES, PH, ASI, SDW, SFW, EH	14
18	MQTL2_9	2	6.64	bhlh147-umc137a	504.48	215451653	216366486	11	ES, GY, KN, KWT, GY, MF, EN, FF	46
19	MQTL2_10	2	6.61	cl11737_1-bsdtf1	598.78	230458500	232674294	8	KW, EH, ASI, FF, EW, KWE, KN, GY	39
20	MQTL3_1	3	5.23	aas5-umc1892	32.57	2195056	2662619	10	PH, KL, EL, ES, ASI, KWE, ES, KWT	38
21	MQTL3_2	3	5.66	IDP7678-mrpa7	125.7	8204808	10756034	11	EH, NKR, NKR, TBN, EL, KWT, DTI, ED, PH	42
22	MQTL3_3	3	10.77	dxr1-prm5	227.04	29846486	56438793	9	PH, EL, EH, KWE, KN, EW, EN	22
23	MQTL3_4	3	6.47	gpm829-IDP8431	289.09	121467044	123493205	11	GY, PH, TBN, NKR, KWT, NKR	12
24	MQTL3_5	3	2.47	lox1-nactf95	392.91	171421717	172645804	9	ASI, PH, EL, KN, EH, NKR, GY	16
25	MQTL3_6	3	6.87	si486024d12-pco084866	487.39	188610371	190264424	4	ES, KWE, PH, ASI	37	ZmNAC080308[63]
26	MQTL3_7	3	0.77	IDP6978-sweet6a	770.87	226310412	227518586	11	EL, GY, EW, PH, KW, KWT, CWE, NKR, KWE	30
27	MQTL4_1	4	5.51	csu221-IDP8302	22.25	2612412	3015421	5	KN, PH, DTI, GY, KN	36
28	MQTL4_2	4	10.47	IDP483-php20725a	77.14	5542752	5799180	1	MF	20
29	MQTL4_3	4	9.71	fl2-IDP3854	214.54	22579361	24004490	5	KWE, NKR, ASI, EH	32
30	MQTL4_4	4	8.92	arftf15-pco133717	319.77	147112461	148593612	8	MF, GY, FF, PH	21
31	MQTL4_5	4	6.43	csu525(rpL17)-IDP4515	408.14	174761145	176257814	6	NKR, MF, NKR, GY, EH	10
32	MQTL4_6	4	16.08	npi570-nbs25	488.75	189173442	193474854	6	NKR, ASI, NKR, ED, KWE	25
33	MQTL4_7	4	4.92	IDP867-umc2200	540.98	200744514	207031432	1	ED	40
34	MQTL4_8	4	12.01	IDP4984-mmp94	598.96	234052510	236481803	4	NKR, KWE, EL	31
35	MQTL4_9	4	0.88	umc1101-arftf16	656.72	241457479	241716042	10	GY, KWT, DTI, KL, EL, KW	19	ZmPP2C[64]
36	MQTL5_1	5	15.23	umc1766-amt10	120.06	6175373	7526227	7	ASI, MF, EL, DTI, KWE, NKR, GY	22
37	MQTL5_2	5	6.78	IDP4864-AY111142	232.18	21439333	30292232	11	GY, EL, NRE, MF, KWE, KL	16
38	MQTL5_3	5	5.35	gpm621-bhlh72	328.73	134792393	158893874	20	PH, NRE, ASI, ED, KW, KT, EW, GY, EN, EL, KWE, NKR	12
39	MQTL5_4	5	9.45	dek33-incw1	370.07	163826847	173408283	7	PH, MF, ASI, FF, GY, EN, KWE	37
40	MQTL5_5	5	15.49	dek605-sut5	398.35	176187350	180476181	6	PH, KW, ASI, NKR	31
41	MQTL5_6	5	2.64	atpc1-expa2	560.45	211768723	212485307	15	CWE, FF, ASI, EL, ES, DTI, PH, GY, EN, NKR	19
42	MQTL6_1	6	11.42	GRMZM2G015708-cl20018_1	27.75	3352342	4894111	3	TBN, DTI, PH	24
43	MQTL6_2	6	1.99	mybr98-cdpk13	122.08	85555310	87487593	3	GY, KWE, ASI	12
44	MQTL6_3	6	11.61	pza03488-IDP8520	153.43	98447529	100782592	2	EH, FF	57
45	MQTL6_4	6	13.4	cl17797_1a-zip5	181.97	106823723	107627557	2	ASI	19
46	MQTL6_5	6	12.31	Zm00001d038139-nactf3	323.74	149203856	151571658	5	NRE, FF, EN, KWE	10
47	MQTL6_6	6	8.58	umc1912-bzip73	395.67	158345779	160179557	5	KWT, MF, EN, KWE	15
48	MQTL6_7	6	16.99	cle22-pco143563	432.56	162442729	164893253	7	SC, MF, EN, KWE, KW	28
49	MQTL7_1	7	3.74	ereb114-umi11	52.69	3330940	3974569	6	NKR, KWE, ASI, MF, ES, FF	25
50	MQTL7_2	7	17.18	asg34a(msd)-IDP8417	149.75	14373489	15815509	3	KWT, KN, ES,	16
51	MQTL7_3	7	2.28	umc1433-bnlg1792	189.23	85541771	87966086	6	NKR, PH, DTI, NKR, ES	27
52	MQTL7_4	7	4.5	mn2-trpp8	217.74	26217428	103498536	3	ED, NKR	31	ZmWRKY79[52]
53	MQTL7_5	7	14.15	bzip74-IDP96	306.83	133939918	136125608	5	PH, ASI, KWE, CD	28	ZmXerico2[53]
54	MQTL7_6	7	4.33	pdh4-pti3	338.3	142133051	143645192	7	KWT, ASI, GY, KWE, CD	24
55	MQTL7_7	7	7.22	cl16175_1-pdk4	527.35	173266204	174144404	3	KN, CWE, NKR	49	ZmTCP42[54]
56	MQTL7_8	7	8.86	umc2368-px3	572.87	177702901	178734676	6	KWE, DTI, NKR, EW, KWT, NKR	63	ALDH22A1[65]
57	MQTL8_1	8	11.66	mmp166-vt2	145.83	15281961	17398865	4	PH, EL, MF	13
58	MQTL8_2	8	1.65	umc1157-mybr87	207.06	72047547	72404407	21	EL, KN, EH, ASI, PH, SW, MF, GY, NKR, EW, FF	24
59	MQTL8_3	8	8.97	cdpk23-hb86	228.81	77013599	82155226	7	KN, SW, FF, ASI	6
60	MQTL8_4	8	15.59	gid2-pco138410b	300.1	108952820	114407967	5	GY, KWE, ASI, SW	10
61	MQTL8_5	8	6.79	umc1765-cpp8	326.17	120465369	125356933	2	ED, ASI	40
62	MQTL8_6	8	3.44	umc1130-pco098884	334.17	125953884	126078343	6	FF, FD, ASI, MF	33
63	MQTL8_7	8	2.51	blk3-csu829	370.37	137997933	138331960	6	KWE, ES, EL, DTI, MF, FF	45
64	MQTL8_8	8	6.73	tcptf20-IDP8974	421.7	165936679	167528413	7	TBN, PH, GY, ASI, DTI, FF	53
65	MQTL8_9	8	29.48	IDP7331-AY110053	535.34	175524889	177055756	2	KWT, GY	17
66	MQTL8_10	8	0.4	gst1-pco073464	573.34	178411857	178502466	3	ES, NKR, KWT	5	ZmWRKY106[66]
67	MQTL9_1	9	15.62	IDP1969-orc1	85.33	10624258	11825109	3	KL, ASI, ES	9	ZmPTF1[55]
68	MQTL9_2	9	7.81	pza01272-wrky39	163.69	18806523	20007083	7	GY, PH, KN, ASI	17
69	MQTL9_3	9	7.68	bzip93-hlt1	245.41	96085990	100133689	16	GY, PH, KWT, EN, KW, KN, ASI, MF, ES, KWE	10	ZmTIP1[56],ZmVPP1[49]
70	MQTL9_4	9	11.91	murE1-bk2	307.28	119414807	125272239	3	GY, CWE, ES	26
71	MQTL9_5	9	16.43	sweet12b-sirk1	341.45	131985732	135946433	2	KN, FF	5	ZmRtn16[57]
72	MQTL9_6	9	12.87	AY109550-toc34	445.49	144877403	146546312	3	MF, FF	11
73	MQTL9_7	9	5.36	IDP5928-pgl52	505.02	149343171	149452163	8	GY, CWE, SFW, PH, EN, KWT, EH	39
74	MQTL9_8	9	2	umc2207-nrat3	525.28	150279277	150532996	4	CWE, ASI, PH, EH	55
75	MQTL9_9	9	61.49	abi43-IDP1419	590.54	153119353	156889520	2	FF, ASI	35	ZmBSK1[58]
76	MQTL10_1	10	14.06	pop3-umc1432	98.68	4672326	5444101	3	KWT, NRE, KT	45
77	MQTL10_2	10	11.45	tubtf14-pco143033	148.72	8711082	13075806	3	EL, FF, KT	16	ASR1[59]
78	MQTL10_3	10	5.35	atg8d-bzip32	192.85	59002720	61716615	8	EL, KWE, DTI, GY, KT, KWT, EH	18
79	MQTL10_4	10	11.77	umc1739-chr122	234.02	87102320	89426926	8	PH, GY, KWT, KN, EH	20
80	MQTL10_5	10	8.3	prh90-magi93696	269.98	114052762	117927675	9	KN, KWE, KWT, GY, EW	44
81	MQTL10_6	10	11.79	umc1280-nactf65	315.67	129239384	131799846	4	ASI, EW, PH, KWT	10
82	MQTL10_7	10	6.75	dof23-isr1	373.73	138350501	139806665	11	KN, ASI, EL, EN, DTI, GY	26
83	MQTL10_8	10	15.99	bnlg2190-ago2b	424.16	142866476	143203163	9	KN, KWT, DTI, FF, EN, ES, NRE	60
Note: The physical distance bolded interval coincides with Previous research.
