# Supplementary material for: Meta-Quantitative Trait Loci Analysis and Candidate Gene Mining for Drought Tolerance-Associated Traits in Maize (Zea mays L.)
Source: Int J Mol Sci. 2024 Apr 12;25(8):4295. doi: 10.3390/ijms25084295 (PMC11049847; doi:10.3390/ijms25084295)
Supplement: Supplementary file 1 [file ijms-25-04295-s001.zip › Table S5.xlsx]

## Sheet: Sheet1
Table S5. Summary of GWAS used for the present study
No.	Genotyping platform (number of markers)	Traits	Population size	No. of MTAs	Environments	References
1	SNP50 array	PH, EH, EPO, DTA, DTS, ASI, GY, KNO, HKW	350	29	China	Xue et al. [47]
2	56,110 SNP	ASI, EL, EG, KPR, KRN, HKW, GY	240	64	India	Nepolean et al.[48]
3	556,944 SNP	SR	367	42	China	Wang et al. [49]
4	11,817,466 SNP	SDW, RDW, PRL, SRL, SRN, CRL, OCRN, ACRN	373	735	China	Li et al. [50]
5	776,254 SNP	ASI, PH, EBM	279	80	China	Khan et al. [51]
