# Supplementary material for: Meta-Quantitative Trait Loci Analysis and Candidate Gene Mining for Drought Tolerance-Associated Traits in Maize (Zea mays L.)
Source: Int J Mol Sci. 2024 Apr 12;25(8):4295. doi: 10.3390/ijms25084295 (PMC11049847; doi:10.3390/ijms25084295)
Supplement: Supplementary file 1 [file ijms-25-04295-s001.zip › Table S6.xlsx]

## Sheet: Sheet1
Table S6. No. of coincidence of MTA within MQTL
No.	MQTL	Chr	Left physical positon (bp)	Right physical position (bp)	MTA/SNP name	Physical Position of SNPs (bp)	Reference
1	MQTL1_3	1	52183379	55756798	s1_52518015	52518015	Li et al.[50]
2	MQTL1_3	1	52183379	55756798	s1_52522505	52522505	Li et al.[50]
3	MQTL1_3	1	52183379	55756798	s1_52525524	52525524	Li et al.[50]
4	MQTL1_3	1	52183379	55756798	s1_52587194	52587194	Li et al.[50]
5	MQTL1_3	1	52183379	55756798	s1_53183941	53183941	Li et al.[50]
6	MQTL1_3	1	52183379	55756798	s1_53183941	53183941	Li et al.[50]
7	MQTL1_3	1	52183379	55756798	s1_53184781	53184781	Li et al.[50]
8	MQTL1_3	1	52183379	55756798	s1_53184879	53184879	Li et al.[50]
9	MQTL1_3	1	52183379	55756798	s1_53184879	53184879	Li et al.[50]
10	MQTL1_3	1	52183379	55756798	s1_53186372	53186372	Li et al.[50]
11	MQTL1_3	1	52183379	55756798	s1_53187773	53187773	Li et al.[50]
12	MQTL1_3	1	52183379	55756798	s1_53187773	53187773	Li et al.[50]
13	MQTL1_3	1	52183379	55756798	s1_53189577	53189577	Li et al.[50]
14	MQTL1_3	1	52183379	55756798	s1_53189711	53189711	Li et al.[50]
15	MQTL1_3	1	52183379	55756798	s1_53189711	53189711	Li et al.[50]
16	MQTL1_3	1	52183379	55756798	s1_53189751	53189751	Li et al.[50]
17	MQTL1_3	1	52183379	55756798	s1_53189751	53189751	Li et al.[50]
18	MQTL1_3	1	52183379	55756798	s1_53189753	53189753	Li et al.[50]
19	MQTL1_3	1	52183379	55756798	s1_53189753	53189753	Li et al.[50]
20	MQTL1_3	1	52183379	55756798	s1_53305098	53305098	Li et al.[50]
21	MQTL1_3	1	52183379	55756798	s1_53305098	53305098	Li et al.[50]
22	MQTL1_3	1	52183379	55756798	s1_53328575	53328575	Li et al.[50]
23	MQTL1_3	1	52183379	55756798	s1_53328602	53328602	Li et al.[50]
24	MQTL1_3	1	52183379	55756798	s1_53328793	53328793	Li et al.[50]
25	MQTL1_3	1	52183379	55756798	s1_53328807	53328807	Li et al.[50]
26	MQTL1_3	1	52183379	55756798	s1_53328879	53328879	Li et al.[50]
27	MQTL1_3	1	52183379	55756798	s1_53328884	53328884	Li et al.[50]
28	MQTL1_3	1	52183379	55756798	s1_53328913	53328913	Li et al.[50]
29	MQTL1_3	1	52183379	55756798	s1_53329041	53329041	Li et al.[50]
30	MQTL1_3	1	52183379	55756798	s1_53329247	53329247	Li et al.[50]
31	MQTL1_3	1	52183379	55756798	s1_53329278	53329278	Li et al.[50]
32	MQTL1_3	1	52183379	55756798	s1_53329364	53329364	Li et al.[50]
33	MQTL1_3	1	52183379	55756798	s1_53461762	53461762	Li et al.[50]
34	MQTL1_3	1	52183379	55756798	s1_53462378	53462378	Li et al.[50]
35	MQTL1_3	1	52183379	55756798	s1_53463295	53463295	Li et al.[50]
36	MQTL1_3	1	52183379	55756798	s1_53463295	53463295	Li et al.[50]
37	MQTL1_3	1	52183379	55756798	s1_53463301	53463301	Li et al.[50]
38	MQTL1_3	1	52183379	55756798	s1_53463301	53463301	Li et al.[50]
39	MQTL1_3	1	52183379	55756798	s1_53463322	53463322	Li et al.[50]
40	MQTL1_3	1	52183379	55756798	s1_53463322	53463322	Li et al.[50]
41	MQTL1_3	1	52183379	55756798	s1_53463587	53463587	Li et al.[50]
42	MQTL1_3	1	52183379	55756798	s1_53463587	53463587	Li et al.[50]
43	MQTL1_3	1	52183379	55756798	s1_53688652	53688652	Li et al.[50]
44	MQTL1_3	1	52183379	55756798	s1_53753759	53753759	Li et al.[50]
45	MQTL1_3	1	52183379	55756798	s1_54034806	54034806	Li et al.[50]
46	MQTL1_3	1	52183379	55756798	s1_54036361	54036361	Li et al.[50]
47	MQTL1_3	1	52183379	55756798	s1_54254208	54254208	Li et al.[50]
48	MQTL1_3	1	52183379	55756798	s1_54344648	54344648	Li et al.[50]
49	MQTL1_3	1	52183379	55756798	s1_54344767	54344767	Li et al.[50]
50	MQTL1_3	1	52183379	55756798	s1_54344774	54344774	Li et al.[50]
51	MQTL1_3	1	52183379	55756798	s1_54344806	54344806	Li et al.[50]
52	MQTL1_3	1	52183379	55756798	s1_54452540	54452540	Li et al.[50]
53	MQTL1_3	1	52183379	55756798	s1_54460828	54460828	Li et al.[50]
54	MQTL1_3	1	52183379	55756798	s1_54484516	54484516	Li et al.[50]
55	MQTL1_3	1	52183379	55756798	s1_54575736	54575736	Li et al.[50]
56	MQTL1_3	1	52183379	55756798	s1_55061459	55061459	Li et al.[50]
57	MQTL1_3	1	52183379	55756798	s1_55061972	55061972	Li et al.[50]
58	MQTL1_3	1	52183379	55756798	s1_55378310	55378310	Li et al.[50]
59	MQTL1_3	1	52183379	55756798	s1_55379374	55379374	Li et al.[50]
60	MQTL1_3	1	52183379	55756798	s1_55379614	55379614	Li et al.[50]
61	MQTL1_3	1	52183379	55756798	s1_55380745	55380745	Li et al.[50]
62	MQTL1_3	1	52183379	55756798	s1_55490605	55490605	Li et al.[50]
63	MQTL1_3	1	52183379	55756798	s1_55553246	55553246	Li et al.[50]
64	MQTL1_3	1	52183379	55756798	s1_55559859	55559859	Li et al.[50]
65	MQTL1_3	1	52183379	55756798	s1_55560746	55560746	Li et al.[50]
66	MQTL1_3	1	52183379	55756798	s1_55560840	55560840	Li et al.[50]
67	MQTL1_3	1	52183379	55756798	s1_55561121	55561121	Li et al.[50]
68	MQTL1_3	1	52183379	55756798	s1_55697459	55697459	Li et al.[50]
69	MQTL1_4	1	82647801	85851294	SYN3057	83838479	Xue et al.[47]
70	MQTL1_6	1	194612478	198700005	chr1.S_195921982	195921982	Wang et al.[49]
71	MQTL2_3	2	34306395	42787090	chr2S 36906536	36906536	Wang et al.[49]
72	MQTL2_3	2	34306395	42787090	s2_38090175	38090175	Li et al.[50]
73	MQTL2_3	2	34306395	42787090	s2_38101090	38101090	Li et al.[50]
74	MQTL2_3	2	34306395	42787090	s2_38275869	38275869	Li et al.[50]
75	MQTL2_3	2	34306395	42787090	chr2S 42618851	42618851	Wang et al.[49]
76	MQTL2_4	2	46859916	51706825	chr2S_48661217	48661217	Wang et al.[49]
77	MQTL2_5	2	82750412	112775606	s2_85418428	85418428	Li et al.[50]
78	MQTL2_5	2	82750412	112775606	s2_85418432	85418432	Li et al.[50]
79	MQTL2_5	2	82750412	112775606	s2_85418452	85418452	Li et al.[50]
80	MQTL2_5	2	82750412	112775606	s2_90931588	90931588	Li et al.[50]
81	MQTL2_5	2	82750412	112775606	s2_91156616	91156616	Li et al.[50]
82	MQTL2_7	2	201423940	207933192	s2_201403115	201403115	Li et al.[50]
83	MQTL2_7	2	201423940	207933192	s2_201403136	201403136	Li et al.[50]
84	MQTL2_7	2	201423940	207933192	s2_201416548	201416548	Li et al.[50]
85	MQTL2_7	2	201423940	207933192	s2_201634162	201634162	Li et al.[50]
86	MQTL2_7	2	201423940	207933192	s2_201638346	201638346	Li et al.[50]
87	MQTL2_7	2	201423940	207933192	s2_201793816	201793816	Li et al.[50]
88	MQTL2_7	2	201423940	207933192	s2_201793826	201793826	Li et al.[50]
89	MQTL2_7	2	201423940	207933192	s2_201814137	201814137	Li et al.[50]
90	MQTL2_7	2	201423940	207933192	s2_202193004	202193004	Li et al.[50]
91	MQTL2_7	2	201423940	207933192	s2_202361964	202361964	Li et al.[50]
92	MQTL2_7	2	201423940	207933192	s2_202468378	202468378	Li et al.[50]
93	MQTL2_7	2	201423940	207933192	s2_202913981	202913981	Li et al.[50]
94	MQTL2_7	2	201423940	207933192	s2_203286967	203286967	Li et al.[50]
95	MQTL2_7	2	201423940	207933192	s2_204895212	204895212	Li et al.[50]
96	MQTL2_7	2	201423940	207933192	s2_204895223	204895223	Li et al.[50]
97	MQTL2_7	2	201423940	207933192	s2_206012364	206012364	Li et al.[50]
98	MQTL2_7	2	201423940	207933192	chr2s 206081022	206081022	Wang et al.[49]
99	MQTL2_7	2	201423940	207933192	chr2s 206122758	206122758	Wang et al.[49]
100	MQTL2_10	2	229458500	233674294	s2_231034081	231034081	Li et al.[50]
101	MQTL2_10	2	229458500	233674294	s2_231034086	231034086	Li et al.[50]
102	MQTL2_10	2	229458500	233674294	s2_231034096	231034096	Li et al.[50]
103	MQTL2_10	2	229458500	233674294	s2_231034122	231034122	Li et al.[50]
104	MQTL2_10	2	229458500	233674294	s2_231034131	231034131	Li et al.[50]
105	MQTL2_10	2	229458500	233674294	s2_231044629	231044629	Li et al.[50]
106	MQTL2_10	2	229458500	233674294	s2_231132920	231132920	Li et al.[50]
107	MQTL2_10	2	229458500	233674294	s2_231132966	231132966	Li et al.[50]
108	MQTL2_10	2	229458500	233674294	s2_231133070	231133070	Li et al.[50]
109	MQTL2_10	2	229458500	233674294	s2_231133227	231133227	Li et al.[50]
110	MQTL2_10	2	229458500	233674294	s2_231143835	231143835	Li et al.[50]
111	MQTL2_10	2	229458500	233674294	s2_231144284	231144284	Li et al.[50]
112	MQTL3_1	3	1195056	3662619	PZE-103003226	2449913	Khan et al.[51]
113	MQTL3_2	3	7204808	11756034	s3_9978616	9978616	Li et al.[50]
114	MQTL3_2	3	7204808	11756034	s3_9979663	9979663	Li et al.[50]
115	MQTL3_3	3	28846486	57438793	s3_34784590	34784590	Li et al.[50]
116	MQTL3_3	3	28846486	57438793	PZE-103046076	47639590	Nepolean et al.[48]
117	MQTL3_3	3	28846486	57438793	SYN941	50205104	Nepolean et al.[48]
118	MQTL3_4	3	120467044	124493205	s3_121981209	121981209	Li et al.[50]
119	MQTL3_4	3	120467044	124493205	s3_122039996	122039996	Li et al.[50]
120	MQTL3_4	3	120467044	124493205	s3_122040025	122040025	Li et al.[50]
121	MQTL3_4	3	120467044	124493205	s3_122043844	122043844	Li et al.[50]
122	MQTL3_4	3	120467044	124493205	s3_122050514	122050514	Li et al.[50]
123	MQTL3_4	3	120467044	124493205	s3_122054854	122054854	Li et al.[50]
124	MQTL3_4	3	120467044	124493205	s3_122093031	122093031	Li et al.[50]
125	MQTL3_4	3	120467044	124493205	s3_122093053	122093053	Li et al.[50]
126	MQTL3_4	3	120467044	124493205	s3_122093064	122093064	Li et al.[50]
127	MQTL3_4	3	120467044	124493205	s3_122145419	122145419	Li et al.[50]
128	MQTL3_7	3	225310412	228518586	s3_226077094	226077094	Li et al.[50]
129	MQTL3_7	3	225310412	228518586	s3_226077104	226077104	Li et al.[50]
130	MQTL4_2	4	4542752	6799180	s4_6181331	6181331	Li et al.[50]
131	MQTL4_9	4	240457479	242716042	s4_240862268	240862268	Li et al.[50]
132	MQTL4_9	4	240457479	242716042	s4_240873786	240873786	Li et al.[50]
133	MQTL4_9	4	240457479	242716042	s4_240877540	240877540	Li et al.[50]
134	MQTL4_9	4	240457479	242716042	s4_240877547	240877547	Li et al.[50]
135	MQTL4_9	4	240457479	242716042	s4_240935071	240935071	Li et al.[50]
136	MQTL4_9	4	240457479	242716042	s4_240935101	240935101	Li et al.[50]
137	MQTL4_9	4	240457479	242716042	s4_241327966	241327966	Li et al.[50]
138	MQTL4_9	4	240457479	242716042	s4_241335584	241335584	Li et al.[50]
139	MQTL4_9	4	240457479	242716042	s4_241338901	241338901	Li et al.[50]
140	MQTL4_9	4	240457479	242716042	s4_241340417	241340417	Li et al.[50]
141	MQTL4_9	4	240457479	242716042	s4_241340524	241340524	Li et al.[50]
142	MQTL4_9	4	240457479	242716042	s4_241340525	241340525	Li et al.[50]
143	MQTL4_9	4	240457479	242716042	s4_241340769	241340769	Li et al.[50]
144	MQTL4_9	4	240457479	242716042	s4_241340780	241340780	Li et al.[50]
145	MQTL4_9	4	240457479	242716042	s4_241340801	241340801	Li et al.[50]
146	MQTL4_9	4	240457479	242716042	s4_241341395	241341395	Li et al.[50]
147	MQTL4_9	4	240457479	242716042	s4_241342278	241342278	Li et al.[50]
148	MQTL4_9	4	240457479	242716042	s4_241396804	241396804	Li et al.[50]
149	MQTL4_9	4	240457479	242716042	s4_241403327	241403327	Li et al.[50]
150	MQTL4_9	4	240457479	242716042	s4_241442545	241442545	Li et al.[50]
151	MQTL4_9	4	240457479	242716042	s4_241813450	241813450	Li et al.[50]
152	MQTL4_9	4	240457479	242716042	s4_241813453	241813453	Li et al.[50]
153	MQTL4_9	4	240457479	242716042	s4_241948811	241948811	Li et al.[50]
154	MQTL4_9	4	240457479	242716042	s4_241948948	241948948	Li et al.[50]
155	MQTL4_9	4	240457479	242716042	s4_242138396	242138396	Li et al.[50]
156	MQTL4_9	4	240457479	242716042	s4_242138544	242138544	Li et al.[50]
157	MQTL4_9	4	240457479	242716042	s4_242142711	242142711	Li et al.[50]
158	MQTL4_9	4	240457479	242716042	s4_242142750	242142750	Li et al.[50]
159	MQTL4_9	4	240457479	242716042	s4_242142751	242142751	Li et al.[50]
160	MQTL5_2	5	20439333	31292232	PZE-105036265	20943410	Nepolean et al.[48]
161	MQTL5_6	5	210768723	213485307	s5_210787386	210787386	Li et al.[50]
162	MQTL5_6	5	210768723	213485307	s5_211200646	211200646	Li et al.[50]
163	MQTL6_3	6	97447529	101782592	s6_98868720	98868720	Li et al.[50]
164	MQTL6_3	6	97447529	101782592	s6_98896116	98896116	Li et al.[50]
165	MQTL6_5	6	148203856	152571658	s6_149717734	149717734	Li et al.[50]
166	MQTL6_7	6	161442729	165893253	S6_162532432	162532432	Khan et al.[51]
167	MQTL6_7	6	161442729	165893253	S6_162533364	162533364	Khan et al.[51]
168	MQTL6_7	6	161442729	165893253	S6_162534514	162534514	Khan et al.[51]
169	MQTL6_7	6	161442729	165893253	S6_162536035	162536035	Khan et al.[51]
170	MQTL6_7	6	161442729	165893253	S6_162537399	162537399	Khan et al.[51]
171	MQTL6_7	6	161442729	165893253	S6_162570085	162570085	Khan et al.[51]
172	MQTL6_7	6	161442729	165893253	S6_162570196	162570196	Khan et al.[51]
173	MQTL6_7	6	161442729	165893253	S6_162581385	162581385	Khan et al.[51]
174	MQTL6_7	6	161442729	165893253	chr6.S 162692195	162692195	Wang et al.[49]
175	MQTL6_7	6	161442729	165893253	chr6.S 164558190	164558190	Wang et al.[49]
176	MQTL7_1	7	2330940	4974569	s7_3557927	3557927	Li et al.[50]
177	MQTL7_1	7	2330940	4974569	s7_3558038	3558038	Li et al.[50]
178	MQTL7_1	7	2330940	4974569	s7_3558079	3558079	Li et al.[50]
179	MQTL7_1	7	2330940	4974569	s7_3613097	3613097	Li et al.[50]
180	MQTL7_1	7	2330940	4974569	s7_3613120	3613120	Li et al.[50]
181	MQTL7_1	7	2330940	4974569	s7_3613161	3613161	Li et al.[50]
182	MQTL7_1	7	2330940	4974569	s7_3613473	3613473	Li et al.[50]
183	MQTL7_1	7	2330940	4974569	s7_3613716	3613716	Li et al.[50]
184	MQTL7_1	7	2330940	4974569	s7_3649846	3649846	Li et al.[50]
185	MQTL7_4	7	93049585	104498536	PZE-107050349	94086205	Nepolean et al.[48]
186	MQTL7_5	7	132939918	137125608	PZE-107084588	134724788	Xue et al.[47]
187	MQTL7_6	7	140951690	144645192	s7_141399657	141399657	Li et al.[50]
188	MQTL7_6	7	140951690	144645192	s7_141551917	141551917	Li et al.[50]
189	MQTL7_6	7	140951690	144645192	ZM013281-0173	141807020	Xue et al.[47]
190	MQTL7_6	7	140951690	144645192	PZE-107093042	142008051	Nepolean et al.[48]
191	MQTL7_6	7	140951690	144645192	s7_143436231	143436231	Li et al.[50]
192	MQTL7_6	7	140951690	144645192	s7_143498311	143498311	Li et al.[50]
193	MQTL7_6	7	140951690	144645192	SYN1093	144435930	Xue et al.[47]
194	MQTL7_7	7	172266204	175144404	S7_172922172	172922172	Khan et al.[51]
195	MQTL7_8	7	176702901	179734676	s7_177967589	177967589	Li et al.[50]
196	MQTL8_1	8	14281961	18398865	s8_16422907	16422907	Li et al.[50]
197	MQTL8_1	8	14281961	18398865	chr8S 16702963	16702963	Wang et al.[49]
198	MQTL8_8	8	164936679	168528413	chr8.S_166831645	166381545	Khan et al.[51]
199	MQTL8_8	8	164936679	168528413	s8_166710010	166710010	Li et al.[50]
200	MQTL8_8	8	164936679	168528413	s8_166710347	166710347	Li et al.[50]
201	MQTL8_8	8	164936679	168528413	s8_167766811	167766811	Li et al.[50]
202	MQTL8_8	8	164936679	168528413	s8_168218728	168218728	Li et al.[50]
203	MQTL8_9	8	174524889	178055756	S8_174647623	174647623	Khan et al.[51]
204	MQTL8_9	8	174524889	178055756	s8_175709007	175709007	Li et al.[50]
205	MQTL8_9	8	174524889	178055756	s8_175844846	175844846	Li et al.[50]
206	MQTL8_9	8	174524889	178055756	s8_175848808	175848808	Li et al.[50]
207	MQTL8_9	8	174524889	178055756	s8_175857298	175857298	Li et al.[50]
208	MQTL8_9	8	174524889	178055756	s8_175868097	175868097	Li et al.[50]
209	MQTL8_9	8	174524889	178055756	s8_175886155	175886155	Li et al.[50]
210	MQTL8_9	8	174524889	178055756	s8_175886233	175886233	Li et al.[50]
211	MQTL8_9	8	174524889	178055756	s8_176823459	176823459	Li et al.[50]
212	MQTL8_9	8	174524889	178055756	s8_176823865	176823865	Li et al.[50]
213	MQTL8_9	8	174524889	178055756	s8_177134166	177134166	Li et al.[50]
214	MQTL8_9	8	174524889	178055756	s8_177245564	177245564	Li et al.[50]
215	MQTL8_9	8	174524889	178055756	s8_177292729	177292729	Li et al.[50]
216	MQTL8_9	8	174524889	178055756	s8_177293589	177293589	Li et al.[50]
217	MQTL8_9	8	174524889	178055756	s8_177771662	177771662	Li et al.[50]
218	MQTL8_9	8	174524889	178055756	s8_177771719	177771719	Li et al.[50]
219	MQTL8_9	8	174524889	178055756	s8_177771897	177771897	Li et al.[50]
220	MQTL8_10	8	177411857	179502466	s8_178195435	178195435	Li et al.[50]
221	MQTL8_10	8	177411857	179502466	s8_179414250	179414250	Li et al.[50]
222	MQTL9_6	9	143877403	147546312	chr9.S 144612676	144612676	Wang et al.[49]
223	MQTL9_7	9	148343171	150452163	S9_149312650	149312650	Khan et al.[51]
224	MQTL9_9	9	152119353	157889520	S9_153782708	153782708	Khan et al.[51]
225	MQTL9_9	9	152119353	157889520	s9_155412648	155412648	Li et al.[50]
226	MQTL9_9	9	152119353	157889520	s9_155447042	155447042	Li et al.[50]
227	MQTL9_9	9	152119353	157889520	s9_155454469	155454469	Li et al.[50]
228	MQTL9_9	9	152119353	157889520	s9_155560825	155560825	Li et al.[50]
229	MQTL9_9	9	152119353	157889520	s9_155560915	155560915	Li et al.[50]
230	MQTL9_9	9	152119353	157889520	s9_155561853	155561853	Li et al.[50]
231	MQTL9_9	9	152119353	157889520	s9_155562628	155562628	Li et al.[50]
232	MQTL9_9	9	152119353	157889520	s9_155579235	155579235	Li et al.[50]
233	MQTL9_9	9	152119353	157889520	s9_155583974	155583974	Li et al.[50]
234	MQTL9_9	9	152119353	157889520	s9_156899185	156899185	Li et al.[50]
235	MQTL10_1	10	3672326	6444101	s10_4264770	4264770	Li et al.[50]
236	MQTL10_2	10	7711082	14075806	PZE-110012640	10633751	Xue et al.[47]
237	MQTL10_3	10	58002720	62716615	PZE-110031865	58513742	Nepolean et al.[48]
238	MQTL10_4	10	86102320	90426926	chrl0.S 87008180	87008180	Wang et al.[49]
239	MQTL10_4	10	86102320	90426926	PZE-110048083	90137704	Nepolean et al.[48]
240	MQTL10_5	10	113052762	118927675	chr10.S 117475868	117475868	Wang et al.[49]
241	MQTL10_7	10	137350501	140806665	S10_137853965	137853965	Khan et al.[51]
242	MQTL10_7	10	137350501	140806665	SYNGENTA14972	138496646	Nepolean et al.[48]
243	MQTL10_7	10	137350501	140806665	s10_140291108	140291108	Li et al.[50]
244	MQTL10_8	10	141866476	144203163	s10_143504936	143504936	Li et al.[50]
245	MQTL10_8	10	141866476	144203163	s10_143600717	143600717	Li et al.[50]
246	MQTL10_8	10	141866476	144203163	s10_143600717	143600717	Li et al.[50]
247	MQTL10_8	10	141866476	144203163	s10_143600719	143600719	Li et al.[50]
