# Supplementary material for: Meta-Quantitative Trait Loci Analysis and Candidate Gene Mining for Drought Tolerance-Associated Traits in Maize (Zea mays L.)
Source: Int J Mol Sci. 2024 Apr 12;25(8):4295. doi: 10.3390/ijms25084295 (PMC11049847; doi:10.3390/ijms25084295)
Supplement: Supplementary file 1 [file ijms-25-04295-s001.zip › Table S7.xlsx]

## Sheet: Sheet1
Table S7. The 63 maize candidate genes within MQTL and the relevant rice homolog gene related to drought tolerance
No.	Candidate gene ID	Associated MQTL	Associated traits in MQTL	Chr	Left physical position (bp)	Right physical position (bp)	Description	Gene ID of Homologous in rice	Gene name	The phenotypic characteristic of homologous in rice
1	Zm00001d027649	MQTL1_1	KWT, GY, KN, PH, KL, TBN, CD	1	10105590	10109563	CHY-type/CTCHY-type/RING-type Zinc finger protein	LOC_Os10g31850	DCA1	Stomatal conductance
2	Zm00001d028974	MQTL1_3	GY, EW, ASI, EN, EL, DTI	1	53368438	53370381	Ethylene insensitive-like3	LOC_Os07g48630	OsEIL2	1000 kernel weight, Seed size, Root length
3	Zm00001d028999	MQTL1_3	GY, EW, ASI, EN, EL, DTI	1	54263185	54265683	NAC domain containing protein 47	LOC_Os11g03300	OsNAC10, ONAC122	Yield component traits
4	Zm00001d029740	MQTL1_4	ASI, MF, GY, EW, DTI, KWT, FF, KWE	1	84849115	84851294	SUMO-conjugating enzyme SCE1	LOC_Os10g39120	OsSCE1, OsUBC1	Grain yield, Ear setting percentage, Plant height, Above ground fresh weight
5	Zm00001d029715	MQTL1_4	ASI, MF, GY, EW, DTI, KWT, FF, KWE	1	83658962	83662343	Alpha/beta-Hydrolases superfamily protein	LOC_Os06g04169	OsBDG	Epicuticular wax
6	Zm00001d029736	MQTL1_4	ASI, MF, GY, EW, DTI, KWT, FF, KWE	1	84581725	84587077	Bell-like homeodomain protein 3	LOC_Os03g03260	OsHB22
7	Zm00001d005270	MQTL2_6	GY, KWE, KN, MF	2	166551926	166562036	Probable tyrosine-protein phosphatase	LOC_Os09g05020	PFA-DSP1
8	Zm00001d006372	MQTL2_7	ASI, PH	2	205994533	205995809	Actin depolymerizing factor2	LOC_Os03g60580	OsADF3
9	Zm00001d006329	MQTL2_7	ASI, PH	2	204888454	204889753	Hydrophobic protein RCI2B	LOC_Os03g17790	OsRCI2-5
10	Zm00001d006371	MQTL2_7	ASI, PH	2	205967632	205970670	C2 calcium/lipid-binding plant phosphoribosyltransferase family protein	LOC_Os04g58720	OsFTIP6
11	Zm00001d007395	MQTL2_10	KW, EH, ASI, FF, EW, KWE, KN, GY	2	230685598	230692435	Indole-3-acetic acid-amido synthetase GH3.17	LOC_Os11g32520	OsGH3.13, TLD1	Lateral root number, Tiller number, Ear length, Stem diameter, Leaf inclination, Seed root length, Internodal length
12	Zm00001d039631	MQTL3_2	EH, NKR, TBN, EL, KWT, DTI, ED, PH	3	9567326	9577428	Glossy13	LOC_Os01g08260	OsABCG31
13	Zm00001d040464	MQTL3_3	PH, EL, EH, KWE, KN, EW, EN	3	44811230	44812811	Duplicated homeodomain-like superfamily protein	LOC_Os04g58020	OsMYB6
14	Zm00001d040589	MQTL3_3	PH, EL, EH, KWE, KN, EW, EN	3	51740462	51742521	Polygalacturonase	LOC_Os01g19170	PSL1
15	Zm00001d040191	MQTL3_3	PH, EL, EH, KWE, KN, EW, EN	3	31619279	31626394	Zinc ion binding	LOC_Os01g01420	OsCOIN
16	Zm00001d041458	MQTL3_4	GY, PH, TBN, NKR, KWT	3	121467044	121469050	Methylsterol monooxygenase 1-2	LOC_Os10g39810	OsGL1-10
17	Zm00001d042541	MQTL3_5	ASI, PH, EL, KN, EH, NKR, GY	3	171421717	171425401	Lipoxygenase2	LOC_Os03g49260	OsLOX3, r9-LOX1	Leaf roll
18	Zm00001d051938	MQTL4_5	NKR, MF, GY, EH	4	174854965	174856718	Cinnamoyl-CoA reductase 1	LOC_Os02g56700	OsCCR10	Relative water content
19	Zm00001d051932	MQTL4_5	NKR, MF, GY, EH	4	174800177	174804263	Protein ECERIFERUM 1	LOC_Os02g56920	OsGL1-6
20	Zm00001d052537	MQTL4_6	NKR, ASI, ED, KWE	4	192553796	192554988	RCN1-Corn Centroradialis/TFL1-like protein	LOC_Os11g05470	RCN1, FDR2, OsCEN2	Plant height, Earing time, Number of grain per ear, Kernel width, Kernel length, Kernel thickness, Grain yield, 1000 kernel weight
21	Zm00001d052562	MQTL4_6	NKR, ASI, ED, KWE	4	193207888	193210831	Basic-leucine zipper (bZIP) transcription factor family protein	LOC_Os11g05640	OsZIP-2a, OsbZIP80
22	Zm00001d052416	MQTL4_6	NKR, ASI, ED, KWE	4	189489014	189494599	Putative CBL-interacting protein kinase family protein isoform 1%253B Putative CBL-interacting protein kinase family protein isoform 2%253B Putative CBL-interacting protein kinase family protein isoform 3%253B Putative CBL-interacting protein kinase family protein isoform 4	LOC_Os07g48760	CIPK03	Earing time, Grains per spike, Grain yield
23	Zm00001d052495	MQTL4_6	NKR, ASI, ED, KWE	4	191453257	191461522	AT-hook motif nuclear-localized protein 1	LOC_Os11g05160	OsAHL1	Chlorophyll content
24	Zm00001d052890	MQTL4_7	ED	4	203611347	203615518	Squamosa promoter-binding-like protein 15	LOC_Os08g39890	IPA1	Plant height, Ear length, Tiller number, Number of grain per ear, Ear setting percentage, Stem diameter, 1000 kernel weight, Grain yield
25	Zm00001d013208	MQTL5_1	ASI, MF, EL, DTI, KWE, NKR, GY	5	6587631	6588425	Zinc finger protein AZF2	LOC_Os03g55540	OsADR3
26	Zm00001d013256	MQTL5_1	ASI, MF, EL, DTI, KWE, NKR, GY	5	7181062	7184784	Brittle stalk-2-like protein 4	LOC_Os10g35460	DROT1, qDR10b	Cellulose content
27	Zm00001d013201	MQTL5_1	ASI, MF, EL, DTI, KWE, NKR, GY	5	6396505	6403575	Serine/threonine-protein kinase SRK2E	LOC_Os03g55600	OsSAPK8
28	Zm00001d014025	MQTL5_2	GY, EL, NRE, MF, KWE, KL	5	29087958	29092328	Cyclase family protein	LOC_Os09g02270	OsCYL4, OsCYL4a, OsCYL4b
29	Zm00001d016294	MQTL5_3	PH, NRE, ASI, ED, KW, KT, EW, GY, EN, EL, KWE, NKR	5	155926763	155927329	Abscisic acid receptor PYL2	LOC_Os06g36670	OsPYL9, OsPYL/RCAR9, OsPYL2
30	Zm00001d016105	MQTL5_3	PH, NRE, ASI, ED, KW, KT, EW, GY, EN, EL, KWE, NKR	5	144804711	144808906	Abscisic acid receptor PYL9	LOC_Os02g15640	OsPYL/RCAR3, OsPYL3, OsPYL10	Relative water content
31	Zm00001d016616	MQTL5_4	PH, MF, ASI, FF, GY, EN, KWE	5	170223307	170225943	Ethylene-responsive transcription factor ERF115	LOC_Os04g32620	OsRap2.6, OsERF101
32	Zm00001d036364	MQTL6_2	GY, KWE, ASI	6	85809798	85811340	NAC domain containing protein 36	LOC_Os06g51070	ONAC095
33	Zm00001d036356	MQTL6_2	GY, KWE, ASI	6	85555310	85558301	Terminal acidic SANT 1	LOC_Os06g08290	AID1, OsMYBR57	Pollen abortion, Earing time, Tiller number
34	Zm00001d036755	MQTL6_3	EH, FF	6	99918334	99928751	ESCRT-related protein CHMP1B	LOC_Os03g60560	ZFP182, ZOS3-21
35	Zm00001d038190	MQTL6_5	NRE, FF, EN, KWE	6	151016911	151026013	Single-stranded nucleic acid binding R3H protein	LOC_Os05g34070	OsDIP1
36	Zm00001d038543	MQTL6_6	KWT, MF, EN, KWE	6	159654814	159659232	Calmodulin-7	LOC_Os03g53200	OsCML4
37	Zm00001d038709	MQTL6_7	SC, MF, EN, KWE, KW	6	163106824	163109751	Ras-related protein RABG3f	LOC_Os05g44050	OsRab7	Leaf senescence
38	Zm00001d018734	MQTL7_1	NKR, KWE, ASI, MF, ES, FF	7	3398466	3398921	Pathogenesis-related protein 1	LOC_Os07g03710	OsPR1a, OsSCP	Relative root length, Relative growth rate, Relative biomass
39	Zm00001d018738	MQTL7_1	NKR, KWE, ASI, MF, ES, FF	7	3653618	3654109	Pathogenesis related protein4	LOC_Os07g03710	OsPR1a, OsSCP	Relative root length, Relative growth rate, Relative biomass
40	Zm00001d020025	MQTL7_3	NKR, PH, DTI, ES	7	86720505	86722227	bZIP-transcription factor 9	LOC_Os09g13570	OsbZIP71	Earing time
41	Zm00001d019364	MQTL7_4	ED, NKR	7	29878045	29878560	Pathogenesis-related protein 1	LOC_Os07g03710	OsPR1a, OsSCP	Relative root length, Relative growth rate, Relative biomass
42	Zm00001d020267	MQTL7_4	ED, NKR	7	103377384	103378274	Ethylene-responsive transcription factor ERF056	LOC_Os08g31580	OsERF48, OsDRAP1	Lateral root number, Plant height, Number of ears per plant, Root shoot ratio, Root length, Dry weight of root, Grain yield
43	Zm00001d020861	MQTL7_5	PH, ASI, KWE, CD	7	134916785	134917437	Protein binding protein	LOC_Os08g38460	OsRHP1
44	Zm00001d009797	MQTL8_3	KN, SW, FF, ASI	8	81867264	81868166	Lactoylglutathione lyase / glyoxalase I family protein	LOC_Os07g46360	OsGly I	Kernel number per ear, Ear setting percentage, Grain yield
45	Zm00001d009747	MQTL8_3	KN, SW, FF, ASI	8	79418294	79421379	Protein phosphatase homolog15	LOC_Os05g51510	OsABIL2	Pollen stainability, Seed root length, Ear germination, Stomatal density
46	Zm00001d009735	MQTL8_3	KN, SW, FF, ASI	8	78597291	78602479	Pentatricopeptide repeat-containing protein mitochondrial	LOC_Os10g35436	Rf1a, Rf-1, Rf5	Lateral root number, Male sterility recovery, Root length
47	Zm00001d009733	MQTL8_3	KN, SW, FF, ASI	8	78509895	78519823	Pentatricopeptide repeat-containing protein mitochondrial	LOC_Os10g35436	Rf1a, Rf-1, Rf5	Lateral root number, Male sterility recovery, Root length
48	Zm00001d010380	MQTL8_4	GY, KWE, ASI, SW	8	112187739	112189008	Zinc finger CCCH domain-containing protein 23	LOC_Os05g10670	OsTZF1	Leaf size, Leaf senescence
49	Zm00001d010697	MQTL8_5	ED, ASI	8	124866876	124869473	Indole-3-acetic acid-amido synthetase GH3.6	LOC_Os11g32520	OsGH3.13, TLD1	Lateral root number, Tiller number, Ear length, Stem diameter, Leaf inclination, Seed root length, Internodal length
50	Zm00001d010638	MQTL8_5	ED, ASI	8	122764919	122767912	bZIP-transcription factor 96	LOC_Os07g48660	OsbZIP62, OsFD7	Earing time, Ear length, Ear type, Grains per spike
51	Zm00001d010579	MQTL8_5	ED, ASI	8	120806361	120811444	Putative calcium-dependent protein kinase family protein	LOC_Os03g48270	OsCPK9	Pollen stainability, Spikelet fertility
52	Zm00001d045044	MQTL9_1	KL, ASI, ES	9	10942420	10945088	AP2-EREBP-transcription factor 160	LOC_Os02g54160	OsEREBP1
53	Zm00001d046603	MQTL9_3	GY, PH, KWT, EN, KW, KN, ASI, MF, ES, KWE	9	98458436	98460079	Putative cytochrome P450 superfamily protein	LOC_Os02g09220	OsCYP71D8L
54	Zm00001d047567	MQTL9_5	KN, FF	9	135816674	135817471	Embryonic cell protein 63	LOC_Os03g20680	OsLEA3-2
55	Zm00001d047523	MQTL9_5	KN, FF	9	133526989	133528220	Probable WRKY transcription factor 30	LOC_Os05g25770	OsWRKY45, WRKY45-1, WRKY45-2
56	Zm00001d047563	MQTL9_5	KN, FF	9	135613729	135615657	Ethylene insensitive-like1	LOC_Os07g48630	OsEIL2	Gain size, Root length, Thousand seed weight
57	Zm00001d047559	MQTL9_5	KN, FF	9	135498629	135502493	Putative homeobox DNA-binding domain superfamily protein	LOC_Os07g48560	OsWOX11	Adventitious roots, Coronal root absence, Tiller angle
58	Zm00001d048347	MQTL9_9	FF, ASI	9	154824112	154825475	Putative NAC domain transcription factor superfamily protein	LOC_Os06g51070	ONAC095
59	Zm00001d048370	MQTL9_9	FF, ASI	9	155213235	155214866	Putative cytochrome P450 superfamily protein	LOC_Os03g04660	WSL5/CYP96B5
60	Zm00001d048357	MQTL9_9	FF, ASI	9	154910740	154914399	Putative leucine-rich repeat receptor-like protein kinase family protein	LOC_Os02g12440	OsGIRL1
61	Zm00001d023420	MQTL10_1	KWT, NRE, KT	10	5099284	5100559	Protein TERMINAL FLOWER 1	LOC_Os11g05470	RCN1, FDR2, OsCEN2	Plant height, Earing time, 1000 kernel weight, Number of grain per ear, Kernel thickness, Kernel width, Kernel length, Grain yield
62	Zm00001d023615	MQTL10_2	EL, FF, KT	10	12201891	12203553	Probable WRKY transcription factor 30	LOC_Os05g25770	OsWRKY45, WRKY45-1, WRKY45-2
63	Zm00001d023616	MQTL10_2	EL, FF, KT	10	12212219	12213881	Probable WRKY transcription factor 30	LOC_Os05g25770	OsWRKY45, WRKY45-1, WRKY45-2
note:Bold characters represent similar characters of rice and maize
