# Supplementary material for: Meta-Quantitative Trait Loci Analysis and Candidate Gene Mining for Drought Tolerance-Associated Traits in Maize (Zea mays L.)
Source: Int J Mol Sci. 2024 Apr 12;25(8):4295. doi: 10.3390/ijms25084295 (PMC11049847; doi:10.3390/ijms25084295)
Supplement: Supplementary file 1 [file ijms-25-04295-s001.zip › Table S8.xlsx]

## Sheet: Sheet1
Table S8. The putative candidate genes identified by the core MQTL regions and maize-rice homologous genes
No.	MQTL	Chr	Gene start (bp)	Gene end (bp)	Gene ID	Gene function annotation	GO term	Tissue(max.TPM observed)
1	MQTL1_1	1	10105590	10109563	Zm00001d027649	CHY-type/CTCHY-type/RING-type Zinc finger protein	GO:0008270, GO:0046872, GO:0046872, GO:0005634, GO:0061630, GO:0006511, GO:0016567	Tassel_V13_Immature(181.5)
2	MQTL1_3	1	53531029	53533986	Zm00001d028984	G2-like-transcription factor 26	GO:0005634, GO:0003677, GO:0003700, GO:0006355	Tassel_V13_Immature(20)
3	MQTL1_3	1	53579645	53583324	Zm00001d028986	Homeobox-transcription factor 130	GO:0005634, GO:0003677, GO:0003700, GO:0048830, GO:0006355, GO:0005524, GO:0000287, GO:0016020, GO:0016887, GO:0140326, GO:0015914, GO:0000166, GO:0005215, GO:0005886, GO:0034204, GO:0045332	Tassel_V13_Immature(26.8)
4	MQTL1_3	1	53748822	53754082	Zm00001d028987	Phospholipid-transporting ATPase 1	NA	Tassel_V13_Immature(22.4)
5	MQTL1_3	1	53759429	53763250	Zm00001d028988	Phospholipid-transporting ATPase 1	GO:0016021, GO:0005524, GO:0000287, GO:0016020, GO:0016887, GO:0140326, GO:0015914, GO:0005215, GO:0000166, GO:0034204	Tassel_V13_Immature(1.4)
6	MQTL1_3	1	53771917	53776759	Zm00001d028989	RING/U-box superfamily protein	NA	Tassel_V13_Immature(15)
7	MQTL1_3	1	53871968	53872373	Zm00001d022733	LincRNA	NA	NA
8	MQTL1_3	1	53883358	53885907	Zm00001d028992	Thioredoxin-like 1-1 chloroplastic	GO:0045454	Tassel_V13_Immature(35)
9	MQTL1_3	1	53953064	53959267	Zm00001d028994	U11/U12 small nuclear ribonucleoprotein 65 kDa protein	GO:0003723, GO:0003676, GO:0005634, GO:0003723, GO:0003676, GO:0000398, GO:0097157, GO:0010229, GO:0030626, GO:1990904, GO:0003723, GO:0003676, GO:0005634, GO:0003723, GO:0003676, GO:1990904, GO:0030626, GO:0097157, GO:0000398, GO:0010229, GO:0003723, GO:0003676, GO:0005634, GO:0003723, GO:0003676, GO:0000398, GO:1990904, GO:0005689, GO:0030626, GO:0097157	Tassel_V13_Immature(14.2)
10	MQTL1_3	1	54034211	54036320	Zm00001d028995	NAC-transcription factor 11	GO:0006355, GO:0003677	Tassel_V13_Immature(40.4)
11	MQTL1_3	1	54038696	54044869	Zm00001d028996	Transducin/WD40 repeat-like superfamily protein	GO:0005515, GO:0016020, GO:0005524, GO:0055085, GO:0000166, GO:0004386, GO:0016887, GO:0030154, GO:0009908, GO:0140359	Tassel_V13_Immature(0.1)
12	MQTL1_3	1	54251798	54253443	Zm00001d028998	Hydroxyproline-rich glycoprotein family protein	NA	Tassel_V13_Immature(728.5)
13	MQTL1_3	1	54263185	54265683	Zm00001d028999	NAC-transcription factor 44	GO:0006355, GO:0003677	Tassel_V13_Immature(55.9)
14	MQTL1_3	1	54290649	54293013	Zm00001d029000	Protein_coding	NA	0
15	MQTL1_3	1	54294914	54295551	Zm00001d022734	LincRNA	NA	NA
16	MQTL1_3	1	54346520	54348605	Zm00001d029002	Alba DNA/RNA-binding protein	GO:0003723, GO:0003676, GO:0016020	Tassel_V13_Immature(0.7)
17	MQTL1_3	1	54370590	54371111	Zm00001d029003	Protein_coding	GO:0006952, GO:0005576	0
18	MQTL1_3	1	54451904	54484683	Zm00001d029004	Guanine nucleotide exchange factor SPIKE 1	GO:0007264, GO:0005085, GO:0043547	Tassel_V13_Immature(35.2)
19	MQTL1_3	1	53368438	53370381	Zm00001d028974	Ethylene insensitive-like3	GO:0005634, GO:0003677, GO:0003700, GO:0009873, GO:0006355	Tassel_V13_Immature(82.6)
20	MQTL1_4	1	83658962	83662343	Zm00001d029715	Alpha/beta-Hydrolases superfamily protein	GO:0016787	Tassel_V13_Immature(4.1)
21	MQTL1_4	1	84581725	84587077	Zm00001d029736	Bell-like homeodomain protein 3	GO:0006355, GO:0003677, GO:0005634, GO:0000978, GO:0000981, GO:0006357	Tassel_V13_Immature(2.6)
22	MQTL1_4	1	84849115	84851294	Zm00001d029740	SUMO-conjugating enzyme SCE1	GO:0005524, GO:0005634, GO:0016925, GO:0061656, GO:0016740, GO:0000166	Tassel_V13_Immature(39.2)
23	MQTL2_3	2	38063917	38068896	Zm00001d003254	Plant UBX domain-containing protein 1	GO:0005515, GO:0051117, GO:0032984	Leaf_30_DAP_NOPOL(28.4)
24	MQTL2_3	2	38076810	38079659	Zm00001d003255	Protein_coding	GO:0003700	Anthers_R1(0.2)
25	MQTL2_3	2	38086415	38091164	Zm00001d003256	Serine/threonine protein phosphatase 2A 59 kDa regulatory subunit B' eta isoform	GO:0007165, GO:0019888, GO:0000159	Silks_R1(20.3)
26	MQTL2_3	2	38091293	38098388	Zm00001d003257	26S proteasome non-ATPase regulatory subunit 6 homolog	GO:0000502, GO:0043161	Whole_seed_14DAP(63.6)
27	MQTL2_3	2	38097924	38102928	Zm00001d003258	GNAT-transcription factor 11	GO:0005737, GO:0046872, GO:0005634, GO:0003824, GO:0051539, GO:0016747, GO:0000049, GO:0033588, GO:0008080, GO:0051536, GO:0002926, GO:0003723, GO:0016740, GO:0016746, GO:0008033	Whole_seed_14DAP(10.9)
28	MQTL2_3	2	38105379	38121803	Zm00001d003259	Galactose oxidase/kelch repeat superfamily protein	GO:0005515, GO:0016020	Embryo_24DAP(20.4)
29	MQTL2_3	2	38257954	38268879	Zm00001d003261	Protein_coding	NA	Cob_V18_Immature(13)
30	MQTL2_3	2	38268766	38273283	Zm00001d003262	Steroid nuclear receptor ligand-binding	GO:0016021, GO:0016020, GO:0016021, GO:0005634, GO:0016020, GO:0016021, GO:0016020, GO:0016021, GO:0016020	Leaf_30_DAP_NOPOL(44.7)
31	MQTL2_3	2	38333787	38335419	Zm00001d003264	BCL-2 binding anthanogene-1	GO:0005515, GO:0005737, GO:0051087, GO:0031072, GO:0050821, GO:0000774	BraceRoot_Node6_abvgrnd_V13(7.5)
32	MQTL2_3	2	38342885	38347402	Zm00001d003265	Topoisomerase-like protein	GO:0005737, GO:0045892, GO:0006417, GO:0016853	Whole_seed_6DAP(101.8)
33	MQTL2_3	2	38348454	38352850	Zm00001d003266	Protein STICHEL-like 2	GO:0005524, GO:0003677, GO:0006260, GO:0003887, GO:0009360, GO:0005634, GO:0000166, GO:0006281, GO:0003689, GO:0006261, GO:0071897, GO:0005663	Cob_V18_Immature(18.1)
34	MQTL2_3	2	38396777	38402590	Zm00001d003267	Protein_coding	NA	Whole_seed_6DAP(84.8)
35	MQTL2_3	2	38416096	38418903	Zm00001d003268	Ku70-binding family protein	GO:0046872, GO:0031314, GO:0004222, GO:0034982, GO:0033615, GO:0016787, GO:0008233, GO:0008237, GO:0006508, GO:0005739	Embryo_16DAP(25)
36	MQTL2_3	2	38421379	38422077	Zm00001d003269	Protein_coding	NA	CrownRoot_Nodes_1_3_V7(2.9)
37	MQTL2_3	2	38436181	38436253	ENSRNA049444055	tRNA	NA	NA
38	MQTL2_3	2	38436181	38436253	Zm00001d003270	tRNA	NA	NA
39	MQTL2_3	2	38437219	38439671	Zm00001d003271	Peptide methionine sulfoxide reductase	GO:0005737, GO:0034599, GO:0008113, GO:0036456, GO:0016491	Leaf_24_DAP_NOPOL(152.2)
40	MQTL2_3	2	38446414	38447769	Zm00001d003272	Nucleotide binding protein	GO:0005515	Embryo_16DAP(1)
41	MQTL2_3	2	38557841	38560622	Zm00001d003273	Protein_coding	NA	Cob_V18_Immature(5.1)
42	MQTL2_3	2	38557923	38559861	Zm00001d003274	OSJNBb0011N17.11 protein	NA	Embryo_16DAP(10.3)
43	MQTL2_3	2	38561318	38564297	Zm00001d003275	Protein-L-isoaspartate O-methyltransferase 1	GO:0004719, GO:0016740, GO:0008168, GO:0032259, GO:0005737, GO:0036211	Embryo_24DAP(22)
44	MQTL2_3	2	38563122	38565277	Zm00001d003276	S-adenosyl-L-methionine-dependent methyltransferases superfamily protein	GO:0008168, GO:0032259, GO:0016740	Leaf_24_DAP_POL(18.3)
45	MQTL2_3	2	38572522	38576707	Zm00001d003277	Stachyose synthase	GO:0005975, GO:0003824, GO:0016740, GO:0016757	Leaf_0_DAP_POL(17.4)
46	MQTL2_3	2	38577195	38577355	ENSRNA049469802	snRNA	NA	NA
47	MQTL2_3	2	38577223	38590549	Zm00001d003278	Protein_coding	NA	0
48	MQTL2_3	2	38586400	38587859	Zm00001d003279	Probable galactinol--sucrose galactosyltransferase 2	GO:0005975, GO:0016740, GO:0016757	Leaf_0_DAP_POL(11.8)
49	MQTL2_3	2	38588527	38588687	ENSRNA049469795	snRNA	NA	NA
50	MQTL2_3	2	38636040	38640054	Zm00001d003280	Probable galactinol--sucrose galactosyltransferase 2	NA	Leaf_0_DAP_POL(16.7)
51	MQTL2_3	2	38640555	38640715	ENSRNA049469783	snRNA	NA	NA
52	MQTL2_3	2	38668117	38670450	Zm00001d003281	Cellulase (glycosyl hydrolase family 5) protein	GO:0071704, GO:0004553, GO:0005975, GO:0016985, GO:0016787, GO:0016798, GO:0008152	Embryo_16DAP(30)
53	MQTL2_3	2	38683613	38684065	Zm00001d003282	Protein_coding	GO:0016021, GO:0016020	Embryo_24DAP(13)
54	MQTL2_3	2	38688056	38688221	Zm00001d000797	LincRNA	NA	NA
55	MQTL2_3	2	38745725	38747760	Zm00001d003283	Cytochrome P450 71B10	GO:0016021, GO:0020037, GO:0005506, GO:0004497, GO:0016705, GO:0046872, GO:0016020, GO:0016491, GO:0071704	Leaf_30_DAP_NOPOL(54.6)
56	MQTL2_3	2	38748934	38756211	Zm00001d003284	MYB-related-transcription factor 93	GO:0005515, GO:0003677, GO:0005634	Cob_V18_Immature(9.6)
57	MQTL2_3	2	38809229	38809299	Zm00001d003285	tRNA	NA	NA
58	MQTL2_3	2	38810487	38810558	Zm00001d003286	tRNA	NA	NA
59	MQTL2_3	2	38811050	38812608	Zm00001d003287	Nitrate transport4	GO:0016021, GO:0005886, GO:0010167, GO:0015112, GO:0042128, GO:0015706, GO:0016020	TapRoot_Z4_7d(2.5)
60	MQTL2_3	2	38812902	38817270	Zm00001d003288	Eukaryotic translation initiation factor 4B2	GO:0003743, GO:0006413, GO:0003729	Whole_seed_14DAP(81.1)
61	MQTL2_3	2	38818381	38832276	Zm00001d003289	Protein_coding	GO:0016740, GO:0016746, GO:0030154, GO:0003810, GO:0007275, GO:0030154	Cob_V18_Immature(4)
62	MQTL2_3	2	38837653	38841384	Zm00001d003290	Flowering locus K homology domain	NA	Leaf_12_DAP_NOPOL(0.2)
63	MQTL2_3	2	38955003	38958609	Zm00001d003291	Transglutaminase21	NA	Endosperm_16DAP(34.1)
64	MQTL2_3	2	38985990	38989290	Zm00001d003292	Beta-14-N-acetylglucosaminyltransferase family protein	GO:0016021, GO:0016757, GO:0016020, GO:0006044, GO:0006487, GO:0003830, GO:0016740	Anthers_R1(28.6)
65	MQTL2_5	2	97279244	97293487	Zm00001d004256	hAT transposon superfamily protein	NA	0
66	MQTL2_5	2	97643770	97655581	Zm00001d004259	Actin-related protein 9	NA	Cob_V18_Immature(17.6)
67	MQTL2_5	2	97679315	97692204	Zm00001d004260	Actin-related protein 9	NA	Embryo_22DAP(17.2)
68	MQTL2_5	2	98026436	98026509	Zm00001d004263	tRNA	NA	NA
69	MQTL2_5	2	98030329	98030402	Zm00001d004264	tRNA	NA	NA
70	MQTL2_5	2	98032713	98032786	Zm00001d004265	tRNA	NA	NA
71	MQTL2_5	2	98034225	98034296	Zm00001d004266	tRNA	NA	NA
72	MQTL2_5	2	98036872	98036942	Zm00001d004267	tRNA	NA	NA
73	MQTL2_5	2	98043101	98043174	Zm00001d004268	tRNA	NA	NA
74	MQTL2_5	2	98043428	98043499	Zm00001d004269	tRNA	NA	NA
75	MQTL2_5	2	98043428	98043499	ENSRNA049441950	tRNA	NA	NA
76	MQTL2_5	2	98046537	98048133	ENSRNA049455608	SSU_rRNA_eukarya	NA	NA
77	MQTL2_6	2	166551926	166562036	Zm00001d005270	Probable tyrosine-protein phosphatase	GO:0016791, GO:0005737, GO:0016311, GO:0008138, GO:0004725, GO:0006470, GO:0004721, GO:0016787	Leaf_30_DAP_POL(8.6)
78	MQTL2_7	2	204222180	204225586	Zm00001d006308	Protein kinase superfamily protein	GO:0005524, GO:0004672, GO:0006468, GO:0004674, GO:0016740, GO:0000166, GO:0016301, GO:0016310	Leaf_12_DAP_POL(32.2)
79	MQTL2_7	2	204243913	204249878	Zm00001d006309	UDP-glucose pyrophosphorylase1	GO:0005737, GO:0006011, GO:0005977, GO:0003983, GO:0070569, GO:0016740, GO:0016779	Whole_seed_14DAP(203.2)
80	MQTL2_7	2	204252569	204255735	Zm00001d006310	Nudix hydrolase 23 chloroplastic	NA	Leaf_12_DAP_NOPOL(9.7)
81	MQTL2_7	2	204256542	204260847	Zm00001d006311	Nicotinate-nucleotide pyrophosphorylase [carboxylating] chloroplastic	GO:0016763, GO:0004514, GO:0009435, GO:0016740, GO:0016757, GO:0019363	Leaf_12_DAP_POL(18.9)
82	MQTL2_7	2	204262006	204262752	Zm00001d006312	PRLI-interacting factor A	NA	Embryo_16DAP(1)
83	MQTL2_7	2	204267041	204267818	Zm00001d006313	Protein_coding	NA	Embryo_16DAP(0.9)
84	MQTL2_7	2	204306849	204308874	Zm00001d006314	Replication protein-like	NA	0
85	MQTL2_7	2	204313242	204316524	Zm00001d006315	Mitochondrial phosphate carrier protein 1 mitochondrial	GO:0005315, GO:0009651, GO:1990547, GO:0016020, GO:0005743, GO:0055085, GO:0015711, GO:0015748, GO:0071705	Leaf_12_DAP_NOPOL(4.8)
86	MQTL2_7	2	204321472	204322036	Zm00001d006316	Protein_coding	NA	Leaf_24_DAP_POL(14.7)
87	MQTL2_7	2	204325597	204331428	Zm00001d006317	Putative E3 ubiquitin-protein ligase RF4	GO:0016874	Leaf_24_DAP_NOPOL(11.6)
88	MQTL2_7	2	204432499	204451772	Zm00001d006319	Protein indeterminate-domain 5 chloroplastic	GO:0003700, GO:0005634, GO:0006355	Endosperm_16DAP(63.5)
89	MQTL2_7	2	204487381	204491071	Zm00001d006320	Signal peptidase complex subunit 3B	GO:0016021, GO:0016020, GO:0008233, GO:0006465, GO:0005787, GO:0045047, GO:0005783, GO:0005789, GO:0031090	Embryo_16DAP(33.3)
90	MQTL2_7	2	204514961	204517027	Zm00001d006321	Zinc finger protein hangover	NA	Embryo_16DAP(76.8)
91	MQTL2_7	2	204521272	204527408	Zm00001d006322	Cysteine--tRNA ligase chloroplastic/mitochondrial	GO:0005737, GO:0005524, GO:0046872, GO:0004812, GO:0006423, GO:0004817, GO:0000166, GO:0006418, GO:0016874, GO:0006412	Leaf_18_DAP_POL(15.1)
92	MQTL2_7	2	204593375	204611852	Zm00001d006323	Histone-lysine N-methyltransferase ATX4	GO:0005515, GO:0008168, GO:0032259, GO:0046872, GO:0016740	Cob_V18_Immature(93.2)
93	MQTL2_7	2	204611682	204615749	Zm00001d006324	Protein_coding	NA	Embryo_16DAP(11.7)
94	MQTL2_7	2	204616270	204616342	Zm00001d006325	tRNA	NA	NA
95	MQTL2_7	2	204617170	204617242	Zm00001d006326	tRNA	NA	NA
96	MQTL2_7	2	204637780	204641095	Zm00001d006327	Probable purine permease 5	GO:0016021, GO:0016020, GO:0015211, GO:0015860, GO:1904823, GO:0005345, GO:0006863	WholeRootSystem_7d(1)
97	MQTL2_7	2	204816152	204820265	Zm00001d006328	Transmembrane 9 superfamily member 9	GO:0016021, GO:0000139, GO:0016020, GO:0010008, GO:0072657, GO:0005794	Tassel_V18_Meiotic(30.8)
98	MQTL2_7	2	204888454	204889753	Zm00001d006329	Proteolipid membrane potential regulator2	GO:0016020	Leaf_30_DAP_NOPOL(201.4)
99	MQTL2_7	2	204891476	204893008	Zm00001d006330	Eukaryotic aspartyl protease family protein	GO:0004190, GO:0006508, GO:0008233	Leaf_24_DAP_POL(10.3)
100	MQTL2_7	2	204901088	204902529	Zm00001d006331	sequence-specific DNA binding transcription factors	GO:0005634, GO:0000976, GO:0043565	Embryo_18DAP(4.9)
101	MQTL2_7	2	204904645	204906248	Zm00001d006332	Protein_coding	NA	Embryo_16DAP(0.7)
102	MQTL2_7	2	204940530	204943456	Zm00001d006333	Organic cation/carnitine transporter 7	GO:0022857, GO:0016020, GO:0055085, GO:0015293, GO:0110165	Tassel_V18_Meiotic(9.5)
103	MQTL2_7	2	204943527	204943599	Zm00001d006334	tRNA	NA	NA
104	MQTL2_7	2	204943527	204943599	ENSRNA049442419	tRNA	NA	NA
105	MQTL2_7	2	204943685	204948597	Zm00001d006335	Protein STRUBBELIG-RECEPTOR FAMILY 4	GO:0005515, GO:0005524, GO:0004672, GO:0006468, GO:0016021, GO:0016020	Anthers_R1(36.7)
106	MQTL2_7	2	204951629	204962354	Zm00001d006336	Protein_coding	GO:0016020	CrownRoot_Node5_V7(29)
107	MQTL2_7	2	204963561	204973694	Zm00001d006337	Whole genome shotgun sequence of line PN40024 scaffold_26.assembly12x (Fragment)	GO:0016021, GO:0016020	BraceRoot_Node6_abvgrnd_V13(25.3)
108	MQTL2_7	2	204998322	205002208	Zm00001d006338	Growth-regulating factor 2	GO:0005634, GO:0032502, GO:0006351, GO:0005524, GO:0006355	0
109	MQTL2_7	2	205002662	205004823	Zm00001d006339	Myosin-10	GO:0005515, GO:0016020, GO:0005524, GO:0003779, GO:0005516, GO:0003774, GO:0016459, GO:0007015, GO:0030048	Silks_R1(3.2)
110	MQTL2_7	2	205015688	205019006	Zm00001d006340	Molybdenum cofactor sulfurase family protein	GO:0003824, GO:0030170, GO:0030151, GO:0016020, GO:1901564, GO:0032787	Leaf_24_DAP_NOPOL(14.8)
111	MQTL2_7	2	205066158	205070059	Zm00001d006341	Molybdenum cofactor sulfurase family protein	GO:0003824, GO:0030170, GO:0030151	Cob_V18_Immature(1.6)
112	MQTL2_7	2	205070819	205077078	Zm00001d006342	Mo-molybdopterin cofactor sulfurase	GO:0003824, GO:0030170, GO:0030151	Leaf_24_DAP_POL(44.9)
113	MQTL2_7	2	205076861	205080041	Zm00001d006343	Carbohydrate-binding X8 domain superfamily protein	GO:0009506, GO:0009506	CrownRoot_Node5_V7(4.2)
114	MQTL2_7	2	205082198	205087995	Zm00001d006344	Protein SUPPRESSOR OF FRI 4	NA	Leaf_30_DAP_NOPOL(44.4)
115	MQTL2_7	2	205967632	205970670	Zm00001d006371	C2 calcium/lipid-binding plant phosphoribosyltransferase family protein	GO:0016021, GO:0016757, GO:0016020, GO:0016740, GO:0110165	Tassel_V18_Meiotic(40.3)
116	MQTL2_7	2	205994533	205995809	Zm00001d006372	actin depolymerizing factor2	GO:0005737, GO:0051015, GO:0003779, GO:0015629, GO:0015629, GO:0030042, GO:0030042, GO:0007015	Anthers_R1(290.5)
117	MQTL2_10	2	231129787	231130699	Zm00001d007411	NADH-ubiquinone reductase complex 1 MLRQ subunit	NA	Embryo_24DAP(8.7)
118	MQTL2_10	2	231171260	231187894	Zm00001d007417	ATP-dependent DNA helicase chloroplastic	GO:0005524, GO:0003676, GO:0006281, GO:0005634, GO:0003677, GO:0004386, GO:0016787, GO:0000166	Leaf_12_DAP_POL(11.6)
119	MQTL2_10	2	231200750	231201963	Zm00001d007418	Protein_coding	GO:0016021, GO:0016020	Embryo_16DAP(5.7)
120	MQTL2_10	2	231204020	231204854	Zm00001d001043	LincRNA	NA	NA
121	MQTL2_10	2	231204454	231205259	Zm00001d001044	LincRNA	NA	NA
122	MQTL2_10	2	231210826	231212874	Zm00001d007419	Probable protein S-acyltransferase 7	GO:0016021, GO:0016021, GO:0019706, GO:0016409, GO:0016020, GO:0016740, GO:0016746, GO:0005794, GO:0005783, GO:0006612, GO:0018230	Anthers_R1(6.3)
123	MQTL2_10	2	231240286	231241095	Zm00001d007420	Protein_coding	GO:0004601, GO:0020037, GO:0006979, GO:0098869	Embryo_16DAP(0.9)
124	MQTL2_10	2	231301639	231307231	Zm00001d007421	Respiratory burst oxidase homolog protein C	NA	TapRoot_Z1_7d(0.2)
125	MQTL2_10	2	231381200	231392647	Zm00001d007422	Aminopeptidase P1	GO:0046872, GO:0016787, GO:0070006, GO:0004177, GO:0110165	Leaf_30_DAP_NOPOL(81.4)
126	MQTL2_10	2	231382951	231383022	Zm00001d007423	tRNA	NA	NA
127	MQTL2_10	2	231425089	231430239	Zm00001d007424	Long chain base biosynthesis protein 1	GO:0003824, GO:0009058, GO:0030170	Leaf_12_DAP_NOPOL(57)
128	MQTL2_10	2	231450964	231451037	Zm00001d007425	tRNA	NA	NA
129	MQTL2_10	2	231451417	231457668	Zm00001d007426	Respiratory burst oxidase homolog protein C	NA	WholeRootSystem_7d(0.1)
130	MQTL2_10	2	231462329	231465400	Zm00001d007427	Electron transfer flavoprotein subunit alpha mitochondrial	GO:0016020, GO:0007131	Cob_V18_Immature(0.7)
131	MQTL2_10	2	231479414	231481680	Zm00001d007428	Maltose excess protein 1 chloroplastic	NA	0
132	MQTL2_10	2	231533490	231537684	Zm00001d007430	Respiratory burst oxidase homolog protein C	NA	WholeRootSystem_7d(2.2)
133	MQTL2_10	2	231539138	231539929	Zm00001d007431	Protein_coding	NA	Whole_seed_14DAP(0.5)
134	MQTL2_10	2	231618336	231620011	Zm00001d007433	UPF0481 protein	GO:0016020	CrownRoot_Node5_V7(1.4)
135	MQTL2_10	2	231628490	231635655	Zm00001d007434	Protein_coding	GO:0005654, GO:0005739	Whole_seed_6DAP(25.5)
136	MQTL2_10	2	231635751	231645139	Zm00001d007435	Protein_coding	GO:0005634, GO:0046982	Tassel_V13_Immature(75.1)
137	MQTL2_10	2	231673422	231677391	Zm00001d007436	CCAAT-HAP5-transcription factor 58	GO:0046982, GO:0005634, GO:0016251, GO:0001046, GO:0006366	Whole_seed_6DAP(28.7)
138	MQTL2_10	2	231740306	231751112	Zm00001d007437	Centromere/kinetochore protein zw10 homolog	GO:0005634, GO:0000278, GO:0000775	Cob_V18_Immature(3.3)
139	MQTL2_10	2	231742694	231745181	Zm00001d007438	Protein_coding	NA	0
140	MQTL2_10	2	231751770	231751842	Zm00001d007439	tRNA	NA	NA
141	MQTL2_10	2	231752685	231752757	Zm00001d007440	tRNA	NA	NA
142	MQTL2_10	2	231764144	231772429	Zm00001d007441	Lung seven transmembrane receptor family protein	GO:0005794, GO:0016021, GO:0016020	Tassel_V18_Meiotic(50.1)
143	MQTL2_10	2	231785495	231792549	Zm00001d007442	Acyl transferase/acyl hydrolase/lysophospholipase superfamily protein	GO:0006629, GO:0016787, GO:0016042, GO:0005737, GO:0016740, GO:0055088, GO:0016020, GO:0004806, GO:0005811, GO:0019433, GO:0016298	Leaf_12_DAP_NOPOL(19.5)
144	MQTL2_10	2	231894171	231894713	Zm00001d007443	Protein_coding	NA	Whole_seed_10DAP(22.1)
145	MQTL2_10	2	231910737	231911345	Zm00001d007444	Protein_coding	NA	Whole_seed_10DAP(194.7)
146	MQTL2_10	2	231913591	231917937	Zm00001d007445	Adagio protein 3	GO:0005515, GO:0016567, GO:0005634, GO:0005829, GO:0019005, GO:0007623, GO:0009637, GO:0009881, GO:0018298, GO:0050896	Tassel_V18_Meiotic(15.3)
147	MQTL2_10	2	231918577	231921582	Zm00001d007446	14-3-3-like protein	NA	Anthers_R1(317.5)
148	MQTL2_10	2	231963135	231963772	Zm00001d007447	Protein_coding	NA	Whole_seed_10DAP(150.2)
149	MQTL2_10	2	231981348	231981854	Zm00001d007448	Pathogenesis-related protein 1	GO:0005576, GO:0005615	CrownRoot_Node5_V13(0.2)
150	MQTL2_10	2	231999644	232003137	Zm00001d007450	Protein_coding	GO:0016020, GO:0005829, GO:0009507, GO:0000162, GO:0009073, GO:0006568, GO:0004834	Tassel_V13_Immature(24.7)
151	MQTL2_10	2	232005074	232005745	Zm00001d007451	CASP-like protein 4D1	GO:0016021, GO:0005886, GO:0016020	0
152	MQTL2_10	2	232010661	232011500	Zm00001d007452	Membrane-associated protein VIPP1 chloroplastic	NA	Anthers_R1(0.5)
153	MQTL2_10	2	232015122	232016503	Zm00001d007453	Class I peptide chain release factor	NA	Leaf_0_DAP_POL(1.6)
154	MQTL2_10	2	232021518	232025481	Zm00001d007454	Maf-like protein CV_0124	GO:0047429, GO:0047429, GO:0047429, GO:0047429, GO:0047429, GO:0047429, GO:0047429	Leaf_18_DAP_NOPOL(24.4)
155	MQTL2_10	2	232059994	232068055	Zm00001d007455	Probable protein S-acyltransferase 23	GO:0005515, GO:0016021, GO:0019706, GO:0016409, GO:0016020, GO:0016740, GO:0016746, GO:0000139, GO:0018345	Leaf_30_DAP_NOPOL(6.8)
156	MQTL2_10	2	230685598	230692435	Zm00001d007395	Indole-3-acetic acid-amido synthetase GH3.17	GO:0005737, GO:0016881	WholeRootSystem_7d(2.1)
157	MQTL3_2	3	9567326	9577428	Zm00001d039631	glossy13	GO:0005524, GO:0016020, GO:0140359, GO:0000166, GO:0055085, GO:0016021, GO:0042626	Cob_V18_Immature(112.6)
158	MQTL3_3	3	31619279	31626394	Zm00001d040191	zinc ion binding	GO:0005515, GO:0009536, GO:0009579, GO:0046872, GO:0005737, GO:1902553, GO:0005634, GO:0005829, GO:0016020, GO:0004601, GO:0020037, GO:0006979, GO:0098869, GO:0061630, GO:0016567, GO:0003697, GO:0006301, GO:0006513	Cob_V18_Immature(48)
159	MQTL3_3	3	44811230	44812811	Zm00001d040464	MYB-related-transcription factor 76	GO:0005634, GO:0003677, GO:0009751, GO:0009739	Cob_V18_Immature(4.3)
160	MQTL3_3	3	51740462	51742521	Zm00001d040589	Polygalacturonase	GO:0005975, GO:0004650, GO:0005618, GO:0016787, GO:0016798, GO:0008152, GO:0004553	CrownRoot_Nodes_1_3_V7(12.2)
161	MQTL3_4	3	122015128	122015631	Zm00001d000598	LincRNA	NA	NA
162	MQTL3_4	3	122111019	122111092	Zm00001d041469	tRNA	NA	NA
163	MQTL3_4	3	122354669	122364344	Zm00001d041471	S-adenosyl-L-methionine-dependent methyltransferases superfamily protein	GO:0008168, GO:0032259, GO:0016740, GO:0016740, GO:0032259	Cob_V18_Immature(11.3)
164	MQTL3_4	3	122367956	122372020	Zm00001d041472	NAC-transcription factor 108	GO:0006355, GO:0003677	Leaf_30_DAP_NOPOL(24.2)
165	MQTL3_4	3	122398508	122398595	Zm00001d041473	tRNA	NA	NA
166	MQTL3_4	3	122398912	122402304	Zm00001d041474	Protein LSD1	GO:0005634, GO:0005840	Anthers_R1(93.2)
167	MQTL3_4	3	122403732	122410495	Zm00001d041475	Septin and tuftelin-interacting protein 1 homolog 1	GO:0003676, GO:0000390, GO:0005634, GO:0016020, GO:0006397, GO:0008380, GO:0005681, GO:0006367, GO:0005672, GO:0006807, GO:0071008, GO:0044238, GO:0043170	Embryo_16DAP(6)
168	MQTL3_4	3	122414822	122416911	Zm00001d041476	Protein kinase superfamily protein	GO:0005524, GO:0004672, GO:0004674, GO:0005886, GO:0006468, GO:0046777, GO:0016740, GO:0000166, GO:0016301, GO:0016310	Leaf_18_DAP_NOPOL(6)
169	MQTL3_4	3	122677055	122681572	Zm00001d041480	DEAD-box ATP-dependent RNA helicase 53	GO:0005737, GO:0005524, GO:0005634, GO:0003723, GO:0003676, GO:0004386, GO:0006364, GO:0000373, GO:0000166	Embryo_16DAP(43.7)
170	MQTL3_4	3	122812178	122814203	Zm00001d041481	Patatin-like protein 6	GO:0006629, GO:0016787, GO:0016042, GO:0016298	CrownRoot_Node5_V13(3.1)
171	MQTL3_4	3	121467044	121469050	Zm00001d041458	Methylsterol monooxygenase 1-2	GO:0016021, GO:0005789, GO:0016020, GO:0005506, GO:0016491, GO:0008610, GO:0009924, GO:1990465, GO:0000254, GO:0016126, GO:0005783, GO:0016829, GO:0004497	WholeRootSystem_7d(13.3)
172	MQTL3_5	3	171421717	171425401	Zm00001d042541	Lipoxygenase2	GO:0046872, GO:0016491, GO:0031408, GO:0016702, GO:0034440, GO:0006633, GO:0051213, GO:0005515, GO:0009611, GO:0009625, GO:0009753, GO:0016165, GO:0006629, GO:0006631, GO:0005737	WholeRootSystem_3d(638.1)
173	MQTL4_5	4	174800177	174804263	Zm00001d051932	Protein ECERIFERUM 1	GO:0016021, GO:0009651, GO:0009409, GO:0005789, GO:0005506, GO:0016491, GO:0009414, GO:0008610, GO:0009924, GO:1990465, GO:0016020, GO:0005783, GO:0016829, GO:0009628, GO:0000254, GO:0016126	Anthers_R1(41.7)
174	MQTL4_5	4	174854965	174856718	Zm00001d051938	Cinnamoyl-CoA reductase 1	GO:0003824, GO:0016616, GO:0009809	Anthers_R1(3.1)
175	MQTL4_6	4	189489014	189494599	Zm00001d052416	Putative CBL-interacting protein kinase family protein isoform 1%253B Putative CBL-interacting protein kinase family protein isoform 2%253B Putative CBL-interacting protein kinase family protein isoform 3%253B Putative CBL-interacting protein kinase	GO:0016021, GO:0005524, GO:0004672, GO:0004674, GO:0006468, GO:0007165, GO:0016020, GO:0016740, GO:0000166, GO:0016301, GO:0016310, GO:0106310, GO:0050896	Anthers_R1(172.2)
176	MQTL4_6	4	191453257	191461522	Zm00001d052495	AT-hook motif nuclear-localized protein 1	GO:0005634, GO:0003680, GO:0003677	Anthers_R1(2.3)
177	MQTL4_6	4	192553796	192554988	Zm00001d052537	RCN1-Corn Centroradialis/TFL1-like protein	NA	Anthers_R1(0.9)
178	MQTL4_6	4	193207888	193210831	Zm00001d052562	Basic-leucine zipper (bZIP) transcription factor family protein	GO:0006355, GO:0003700, GO:0043565, GO:0005634, GO:0003677	Anthers_R1(1.7)
179	MQTL4_7	4	203611347	203615518	Zm00001d052890	Squamosa promoter-binding-like protein 15	GO:0005634, GO:0003677, GO:0046872	Anthers_R1(10.2)
180	MQTL4_9	4	241457479	241460882	Zm00001d053808	Protein JASON	GO:0007142	Anthers_R1(23.4)
181	MQTL4_9	4	241467379	241469250	Zm00001d053809	Defective in cullin neddylation protein	NA	0
182	MQTL4_9	4	241470455	241478524	Zm00001d053810	Replication protein-like	GO:0005634, GO:0003677, GO:0006310, GO:0006281, GO:0006260, GO:0046872, GO:0016020, GO:0016787, GO:0005524, GO:0000166, GO:0004386, GO:0006974, GO:0003678, GO:0000723, GO:0032508, GO:0043130, GO:0035091	0
183	MQTL4_9	4	241525366	241526032	Zm00001d053812	Glycerophosphodiester phosphodiesterase GDPD4	GO:0006629, GO:0008081, GO:0016021, GO:0008889, GO:0006071, GO:0016020	Anthers_R1(6.7)
184	MQTL4_9	4	241592153	241604223	Zm00001d053813	Cullin-associated NEDD8-dissociated protein 1	GO:0010265, GO:0016567	Anthers_R1(53.4)
185	MQTL4_9	4	241603079	241603152	Zm00001d053814	tRNA	NA	NA
186	MQTL4_9	4	241609820	241610200	Zm00001d053815	Auxin-responsive protein SAUR71	GO:0009733	Anthers_R1(0.4)
187	MQTL4_9	4	241615198	241618538	Zm00001d053816	Thiosulfate/3-mercaptopyruvate sulfurtransferase 1 mitochondrial	GO:0004792, GO:0016783, GO:0016740, GO:0005739	Anthers_R1(19.1)
188	MQTL4_9	4	241625577	241626902	Zm00001d053817	OSJNBa0058K23.8 protein%3B protein	NA	Anthers_R1(2.7)
189	MQTL4_9	4	241638522	241638625	ENSRNA049997276	Pre_miRNA	NA	NA
190	MQTL4_9	4	241643895	241648565	Zm00001d053818	Protein kinase superfamily protein	GO:0005524, GO:0004672, GO:0006468, GO:0016301, GO:0016310, GO:0004674, GO:0005886, GO:0046777, GO:0016740, GO:0000166	Anthers_R1(34.3)
191	MQTL4_9	4	241710056	241716042	Zm00001d053819	ARF-transcription factor 16	GO:0005515, GO:0005634, GO:0006355, GO:0003677, GO:0009734, GO:0009725	Anthers_R1(21)
192	MQTL5_1	5	6396505	6403575	Zm00001d013201	Serine/threonine-protein kinase SRK2E	GO:0005524, GO:0004672, GO:0006468, GO:0004674, GO:0016740, GO:0000166, GO:0016301, GO:0016310, GO:0005634, GO:0035556	Embryo_16DAP(52)
193	MQTL5_1	5	6587631	6588425	Zm00001d013208	Zinc finger protein AZF2	GO:0003700, GO:0005634, GO:0006355, GO:0000976	Embryo_16DAP(9.3)
194	MQTL5_1	5	7181062	7184784	Zm00001d013256	Brittle stalk-2-like protein 4	GO:0016021, GO:0016020, GO:0046658, GO:0009832, GO:0010215, GO:0009664, GO:0052324	Embryo_16DAP(70.2)
195	MQTL5_2	5	29087958	29092328	Zm00001d014025	Cyclase family protein	GO:0004061, GO:0019441, GO:0009409, GO:0009414, GO:0009651, GO:0071944	Embryo_16DAP(19.7)
196	MQTL5_3	5	144804711	144808906	Zm00001d016105	Abscisic acid receptor PYL9	GO:0005737, GO:0005634, GO:0038023, GO:0010427, GO:0080163, GO:0009738, GO:0004864	Embryo_16DAP(55.7)
197	MQTL5_3	5	155926763	155927329	Zm00001d016294	Abscisic acid receptor PYL2	GO:0005737, GO:0005634, GO:0038023, GO:0010427, GO:0080163, GO:0009738, GO:0004864	Embryo_16DAP(13.1)
198	MQTL5_4	5	170223307	170225943	Zm00001d016616	AP2-EREBP-transcription factor 129	GO:0005634, GO:0006355, GO:0003677, GO:0003700, GO:0009873, GO:0006351	Embryo_16DAP(12.4)
199	MQTL5_6	5	211768723	211777331	Zm00001d018004	Rho-related protein from plants 1	NA	Embryo_16DAP(77.6)
200	MQTL5_6	5	211811435	211817914	Zm00001d018005	Protease Do-like 9	GO:0005515, GO:0004252, GO:0006508, GO:0008233	Embryo_16DAP(27.9)
201	MQTL5_6	5	211895819	211898527	Zm00001d018006	Serine/threonine-protein kinase WNK (With No Lysine)-related	GO:0016301, GO:0016310	Embryo_16DAP(8.7)
202	MQTL5_6	5	211904182	211904254	Zm00001d018007	tRNA	NA	NA
203	MQTL5_6	5	211905026	211905098	Zm00001d018008	tRNA	NA	NA
204	MQTL5_6	5	211938923	211947803	Zm00001d018009	P-loop containing nucleoside triphosphate hydrolases superfamily protein	GO:0005524, GO:0007018, GO:0003777, GO:0008017, GO:0005874, GO:0007052, GO:0016787, GO:0000166, GO:0003774, GO:0005875, GO:0051231	Embryo_16DAP(25.4)
205	MQTL5_6	5	211974050	211974897	Zm00001d018010	Protein_coding	GO:0016021, GO:0005886, GO:0016020, GO:0010038	Embryo_16DAP(34.5)
206	MQTL5_6	5	211975629	211984184	Zm00001d018011	Lecithin-cholesterol acyltransferase-like 4	GO:0005737, GO:0006629, GO:0008374, GO:0016740, GO:0016746, GO:0004620, GO:0009395, GO:0005829	Embryo_16DAP(24.7)
207	MQTL5_6	5	211978697	211982782	Zm00001d018012	Protein_coding	NA	Embryo_16DAP(0.8)
208	MQTL5_6	5	212102698	212106748	Zm00001d018013	CDP-diacylglycerol--serine O-phosphatidyltransferase 1	NA	Embryo_16DAP(34.2)
209	MQTL5_6	5	212108530	212117488	Zm00001d018014	P-loop containing nucleoside triphosphate hydrolases superfamily protein	GO:0005524, GO:0007018, GO:0003777, GO:0008017, GO:0005874, GO:0007052, GO:0016787, GO:0000166, GO:0003774, GO:0005875, GO:0051231	Embryo_16DAP(27.5)
210	MQTL5_6	5	212198363	212199559	Zm00001d018016	RING-H2 finger protein ATL46	GO:0016021, GO:0016567, GO:0031625, GO:0016020	Embryo_16DAP(2.6)
211	MQTL5_6	5	212204911	212205450	Zm00001d018017	Protein_coding	NA	Embryo_16DAP(6)
212	MQTL5_6	5	212215701	212217938	Zm00001d018019	Putative pentatricopeptide repeat-containing protein	GO:0005515, GO:0008270, GO:0003723, GO:0009451, GO:0043231	Embryo_16DAP(3.9)
213	MQTL5_6	5	212222951	212224144	Zm00001d018021	23-bisphosphoglycerate-independent phosphoglycerate mutase 1	NA	Embryo_16DAP(0.1)
214	MQTL5_6	5	212225087	212227380	Zm00001d018022	Protein_coding	NA	Embryo_16DAP(0.1)
215	MQTL5_6	5	212254262	212257744	Zm00001d018024	Protein_coding	GO:0016021, GO:0005886, GO:0005783, GO:0016020, GO:0009734, GO:0055085, GO:0010329, GO:0009926, GO:0010252, GO:0010315	Embryo_16DAP(48.4)
216	MQTL5_6	5	212350402	212368255	Zm00001d018025	Protein tyrosine kinase family protein	GO:0005524, GO:0004672, GO:0006468, GO:0016301, GO:0016310	Embryo_16DAP(8.6)
217	MQTL5_6	5	212364417	212364487	Zm00001d018026	tRNA	NA	NA
218	MQTL5_6	5	212369588	212370644	Zm00001d018027	Glycine-rich protein	GO:0070300	Embryo_16DAP(106.3)
219	MQTL5_6	5	212372579	212374838	Zm00001d018028	NEP1-interacting protein-like 2	GO:0016021, GO:0016020	Embryo_16DAP(33.9)
220	MQTL5_6	5	212390087	212391281	Zm00001d018029	Casparian strip membrane protein 5	GO:0016021, GO:0051539, GO:0005886, GO:0016020	Embryo_16DAP(10.9)
221	MQTL5_6	5	212391202	212391404	Zm00001d001736	LincRNA	NA	NA
222	MQTL5_6	5	212391759	212393282	Zm00001d018030	Photosynthetic NDH subunit of subcomplex B 4 chloroplastic	GO:0009535, GO:0009773, GO:0010598, GO:0016020	Embryo_16DAP(591.9)
223	MQTL5_6	5	212483686	212485307	Zm00001d018031	Protein_coding	NA	Embryo_16DAP(96.3)
224	MQTL6_2	6	85555310	85558301	Zm00001d036356	MYB-related-transcription factor 98	GO:0003677	Tassel_V13_Immature(19.7)
225	MQTL6_2	6	85809798	85811340	Zm00001d036364	NAC domain containing protein 36	GO:0006355, GO:0003677	Leaf_12_DAP_POL(22)
226	MQTL6_3	6	99918334	99928751	Zm00001d036755	ESCRT-related protein CHMP1B	NA	Embryo_16DAP(0.6)
227	MQTL6_5	6	151016911	151026013	Zm00001d038190	Single-stranded nucleic acid binding R3H protein	GO:0003676	Anthers_R1(50.9)
228	MQTL6_6	6	159654814	159659232	Zm00001d038543	Calmodulin-7	GO:0005509, GO:0019722, GO:0046872, GO:0030234	Embryo_16DAP(180.8)
229	MQTL6_7	6	163221629	163222424	Zm00001d038712	Protein_coding	GO:0016021, GO:0016020	Leaf_30_DAP_NOPOL(113.3)
230	MQTL6_7	6	163229334	163230281	Zm00001d038714	OVATE-transcription factor 29	GO:0005634, GO:0045892	Embryo_16DAP(2)
231	MQTL6_7	6	163280343	163281305	Zm00001d038717	LBD-transcription factor 33	NA	Endosperm_16DAP(28.4)
232	MQTL6_7	6	163324435	163325813	Zm00001d038718	Hemoglobin2	GO:0020037, GO:0046872, GO:0019825, GO:0005344, GO:0015671	Embryo_16DAP(103.4)
233	MQTL6_7	6	163328211	163329067	Zm00001d038719	DNA double-strand break repair rad50 ATPase	GO:0005747	Embryo_16DAP(55.6)
234	MQTL6_7	6	163328534	163330731	Zm00001d001471	LincRNA	NA	NA
235	MQTL6_7	6	163334324	163340060	Zm00001d038720	Protein_coding	NA	Cob_V18_Immature(23.8)
236	MQTL6_7	6	163339216	163339791	Zm00001d038721	Protein_coding	NA	Cob_V18_Immature(17.5)
237	MQTL6_7	6	163343609	163345297	Zm00001d038722	Protein_coding	NA	Leaf_18_DAP_POL(0.8)
238	MQTL6_7	6	163346653	163362540	Zm00001d038723	Eukaryotic aspartyl protease family protein	GO:0016740, GO:0005524, GO:0004672, GO:0006468, GO:0000166, GO:0004674, GO:0016301, GO:0016310, GO:0008233, GO:0006508, GO:0005504, GO:0016872, GO:0009570	Anthers_R1(4)
239	MQTL6_7	6	163366091	163367753	Zm00001d038724	Cyclic phosphodiesterase	GO:0004112, GO:0004113, GO:0009187, GO:0016874	Leaf_30_DAP_POL(19.8)
240	MQTL6_7	6	163368049	163369489	Zm00001d038725	phosphatidylethanolamine-binding protein7	NA	Leaf_0_DAP_NOPOL(126.4)
241	MQTL6_7	6	163374060	163375768	Zm00001d038726	GDSL esterase/lipase	NA	Whole_seed_2DAP(0.7)
242	MQTL6_7	6	163382656	163382940	Zm00001d038727	Protein_coding	NA	Leaf_0_DAP_NOPOL(0.3)
243	MQTL6_7	6	163411334	163420782	Zm00001d038728	Trehalose-6-phosphate synthase12	GO:0005992, GO:0003824, GO:0005991, GO:0005737, GO:0005829, GO:0003825, GO:0016740, GO:0016757, GO:0004805, GO:0016758, GO:0070413	Leaf_12_DAP_NOPOL(46.3)
244	MQTL6_7	6	163421612	163422133	Zm00001d038729	Protein_coding	NA	Leaf_30_DAP_NOPOL(9.3)
245	MQTL6_7	6	163424160	163426976	Zm00001d038730	Protein_coding	GO:0005509, GO:0019722, GO:0019900, GO:0046872, GO:0016020	Leaf_30_DAP_NOPOL(12.8)
246	MQTL6_7	6	163495781	163501518	Zm00001d038731	Protein_coding	NA	Tassel_V13_Immature(0.1)
247	MQTL6_7	6	163536956	163538558	Zm00001d038732	Acid phosphatase/vanadium-dependent haloperoxidase-related protein	GO:0004601, GO:0016020, GO:0098869	Leaf_30_DAP_POL(10.7)
248	MQTL6_7	6	163540535	163542535	Zm00001d038733	Pentatricopeptide repeat-containing protein	GO:0005515, GO:0003729, GO:0005739	Embryo_16DAP(14.5)
249	MQTL6_7	6	163542891	163546787	Zm00001d038734	CLP protease regulatory subunit CLPX1 mitochondrial	GO:0005524, GO:0006457, GO:0051082, GO:0016887, GO:0140662, GO:0008233, GO:0006508, GO:0051603, GO:0005759	Anthers_R1(6.4)
250	MQTL6_7	6	163546997	163547067	Zm00001d038735	tRNA	NA	NA
251	MQTL6_7	6	163548279	163548352	Zm00001d038736	tRNA	NA	NA
252	MQTL6_7	6	163553024	163560354	Zm00001d038737	Serine acetyltransferase3	GO:0005737, GO:0016740, GO:0009001, GO:0006535, GO:0016746, GO:0005829, GO:0016412, GO:0019344	Embryo_16DAP(20.8)
253	MQTL6_7	6	163587524	163587596	Zm00001d038738	tRNA	NA	NA
254	MQTL6_7	6	163589309	163593731	Zm00001d038739	Inner membrane protein oxaA	GO:0016021, GO:0016020	CrownRoot_Node5_V7(38.9)
255	MQTL6_7	6	163596670	163597706	Zm00001d038740	Protein_coding	GO:0071944	CrownRoot_Nodes_1_3_V7(15)
256	MQTL6_7	6	163651425	163652698	Zm00001d038741	Pistil-specific extensin-like protein	GO:0071944	Embryo_16DAP(279)
257	MQTL6_7	6	163657410	163658979	Zm00001d038742	Receptor like protein 29	GO:0005515, GO:0016301, GO:0016310	Embryo_16DAP(5.7)
258	MQTL6_7	6	163755404	163785784	Zm00001d038745	SNF1-related protein kinase catalytic subunit alpha KIN10	GO:0005524, GO:0004672, GO:0006468, GO:0004674, GO:0016740, GO:0000166, GO:0016301, GO:0016310, GO:0106310, GO:0035556	Leaf_30_DAP_POL(96.7)
259	MQTL6_7	6	163786743	163788401	Zm00001d038746	HSF-transcription factor 15	GO:0005634, GO:0006355, GO:0003700, GO:0000978, GO:0006357, GO:0043565, GO:0034605, GO:0003677	Leaf_0_DAP_POL(2.4)
260	MQTL6_7	6	163792911	163797435	Zm00001d038747	Protein_coding	NA	Leaf_0_DAP_NOPOL(224.6)
261	MQTL6_7	6	163801687	163802064	Zm00001d038748	Protein_coding	NA	Stem_V3(1.4)
262	MQTL6_7	6	163852496	163854764	Zm00001d038750	ALA-interacting subunit 1	GO:0016020, GO:0033036, GO:0005794, GO:0016021, GO:0005886, GO:0005783	Anthers_R1(75.4)
263	MQTL6_7	6	163857513	163860102	Zm00001d038751	DNAJ heat shock N-terminal domain-containing protein	GO:0009055, GO:0005506, GO:0051536, GO:0046872, GO:0005783, GO:0022900	Leaf_30_DAP_NOPOL(197.6)
264	MQTL6_7	6	163860157	163860261	ENSRNA049997426	Pre_miRNA	NA	NA
265	MQTL6_7	6	163860157	163860261	zma-MIR399f	miRNA	NA	NA
266	MQTL6_7	6	163865484	163865596	ENSRNA049477506	Pre_miRNA	NA	NA
267	MQTL6_7	6	163867932	163868138	ENSRNA049997429	Pre_miRNA	NA	NA
268	MQTL6_7	6	163867932	163868138	zma-MIR399c	miRNA	NA	NA
269	MQTL6_7	6	163885170	163891049	Zm00001d038752	Protein STICHEL-like 3	GO:0005524, GO:0003677, GO:0006260, GO:0003887, GO:0009360, GO:0000166, GO:0071897, GO:0005634, GO:0006281, GO:0006261, GO:0005663, GO:0003689	Tassel_V13_Immature(11.6)
270	MQTL6_7	6	163895782	163898198	Zm00001d038753	Ubiquitin domain-containing protein	NA	Leaf_30_DAP_NOPOL(43)
271	MQTL6_7	6	163898325	163906090	Zm00001d038754	ER lumen protein retaining receptor	GO:0016021, GO:0005789, GO:0016020, GO:0015031, GO:0006621, GO:0046923, GO:0005783, GO:0006888, GO:0005801	BraceRoot_Node6_abvgrnd_V13(19)
272	MQTL6_7	6	163931390	163932118	Zm00001d038755	Carnitine racemase/ catalytic	GO:0006635, GO:0005777, GO:0003824, GO:0016853, GO:0004165, GO:0004300	Embryo_16DAP(28.7)
273	MQTL6_7	6	163936343	163940582	Zm00001d038756	Protein LIKE COV 1	GO:0005794, GO:0016021, GO:0016020	Leaf_30_DAP_NOPOL(32.2)
274	MQTL6_7	6	163941458	163942027	Zm00001d038757	Putative RING zinc finger domain superfamily protein	GO:0016021, GO:0006511, GO:0061630, GO:0016020, GO:0016567	Leaf_30_DAP_POL(0.1)
275	MQTL6_7	6	163943780	163943882	ENSRNA049477485	snoRNA	NA	NA
276	MQTL6_7	6	163944104	163945486	Zm00001d001472	LincRNA	NA	NA
277	MQTL6_7	6	163944105	163944185	ENSRNA049477560	snoRNA	NA	NA
278	MQTL6_7	6	163944263	163944363	ENSRNA049477514	snoRNA	NA	NA
279	MQTL6_7	6	163955489	163956164	Zm00001d038758	Protein_coding	GO:0006952	Whole_seed_10DAP(73.3)
280	MQTL6_7	6	163962932	163968900	Zm00001d038759	Protein_coding	GO:0006412, GO:0003735, GO:0005840, GO:0016020, GO:0005044, GO:0006897	Anthers_R1(3)
281	MQTL6_7	6	163970657	163972392	Zm00001d038760	DAG protein chloroplastic	GO:0016554, GO:0016020, GO:0006807, GO:0005044, GO:0006897, GO:0043170	Leaf_24_DAP_NOPOL(0.5)
282	MQTL6_7	6	163995859	163996996	Zm00001d038761	WRKY-transcription factor 100	GO:0005634, GO:0006355, GO:0003700, GO:0043565, GO:0003677, GO:0050896	WholePrimaryRoot_7d(23.2)
283	MQTL6_7	6	164016293	164027578	Zm00001d038762	Respiratory burst oxidase3	GO:0004601, GO:0016020, GO:0005509, GO:0016491, GO:0050664, GO:0098869, GO:0005886, GO:0016174	Silks_R1(46.9)
284	MQTL6_7	6	164029433	164030833	Zm00001d038763	UDP-glycosyltransferase 88A1	GO:0016740, GO:0008194, GO:0035251	Embryo_16DAP(0.2)
285	MQTL6_7	6	164059209	164060630	Zm00001d038764	UDP-glycosyltransferase 88A1	GO:0008194, GO:0016740, GO:0016757, GO:0035251	Leaf_30_DAP_NOPOL(51)
286	MQTL6_7	6	164061073	164062509	Zm00001d038765	Anthocyanidin 5%252C3-O-glucosyltransferase	GO:0008194, GO:0016740, GO:0016757, GO:0035251	Cob_V18_Immature(7.7)
287	MQTL6_7	6	164157903	164159112	Zm00001d038766	RING-H2 finger protein ATL67	GO:0016021, GO:0016567, GO:0016740, GO:0016020	Cob_V18_Immature(2.9)
288	MQTL6_7	6	164161090	164161161	ENSRNA049449674	tRNA	NA	NA
289	MQTL6_7	6	164161090	164161161	Zm00001d038767	tRNA	NA	NA
290	MQTL6_7	6	164162505	164164754	Zm00001d038768	Reticulon-like protein B4	GO:0016021, GO:0005789, GO:0016020, GO:0005783	Cob_V18_Immature(41.6)
291	MQTL6_7	6	164167046	164171996	Zm00001d038769	F-box protein	GO:0005515	Cob_V18_Immature(5.7)
292	MQTL6_7	6	163106824	163109751	Zm00001d038709	Ras-related protein RABG3f	GO:0005525, GO:0003924, GO:0015031, GO:0005774	Leaf_30_DAP_NOPOL(255.4)
293	MQTL7_1	7	3330940	3335717	Zm00001d018731	AP2-EREBP-transcription factor 114	GO:0006355, GO:0003677, GO:0003700, GO:0005634, GO:0006351	Embryo_16DAP(4.9)
294	MQTL7_1	7	3338958	3343406	Zm00001d018732	Chaperone DnaJ-domain superfamily protein	GO:0005783, GO:0016021, GO:0016020	Embryo_16DAP(20.4)
295	MQTL7_1	7	3348456	3353488	Zm00001d018733	Folylpolyglutamate synthase	GO:0009396, GO:0005524, GO:0003676, GO:0009058, GO:0004326, GO:0046901, GO:0016881	Embryo_16DAP(11.7)
296	MQTL7_1	7	3351032	3353469	Zm00001d001079	LincRNA	NA	NA
297	MQTL7_1	7	3398466	3398921	Zm00001d018734	Pathogenesis-related protein 1	GO:0005576, GO:0009607, GO:0005615	Embryo_16DAP(289.7)
298	MQTL7_1	7	3399346	3400080	Zm00001d018735	Protein_coding	NA	Embryo_16DAP(0.1)
299	MQTL7_1	7	3534342	3534851	Zm00001d018737	Pathogenesis-related protein 1	GO:0005615	Embryo_16DAP(42.4)
300	MQTL7_1	7	3653618	3654109	Zm00001d018738	pathogenesis related protein4	GO:0006952, GO:0005576, GO:0005615, GO:0009607	Embryo_16DAP(425.3)
301	MQTL7_1	7	3654423	3659087	Zm00001d018739	Protein_coding	NA	Embryo_16DAP(0.1)
302	MQTL7_1	7	3661450	3661824	Zm00001d018740	Solanesyl diphosphate synthase 2 chloroplastic	GO:0008299	Embryo_16DAP(69.3)
303	MQTL7_1	7	3663154	3667321	Zm00001d018741	Protein_coding	NA	0
304	MQTL7_1	7	3845026	3851209	Zm00001d018742	Protein_coding	GO:0005634, GO:0006355, GO:0003677, GO:0000790, GO:0000978, GO:0006357, GO:0000981	Embryo_16DAP(67.5)
305	MQTL7_1	7	3974297	3974569	Zm00001d018744	Putative cyclotide family protein [Source:UniProtKB/TrEMBL%3BAcc:Q4KWL5]	NA	Embryo_16DAP(1448.9)
306	MQTL7_3	7	86720505	86722227	Zm00001d020025	bZIP-transcription factor 9	GO:0006355, GO:0003700, GO:0005634, GO:0003677, GO:0000976, GO:0045893, GO:0016020	Embryo_16DAP(61.4)
307	MQTL7_4	7	29878045	29878560	Zm00001d019364	Pathogenesis-related protein 1	GO:0006952, GO:0005576, GO:0005615, GO:0009607	Embryo_16DAP(10.6)
308	MQTL7_4	7	103377384	103378274	Zm00001d020267	AP2-EREBP-transcription factor 109	GO:0005634, GO:0006355, GO:0003677, GO:0003700, GO:0043565, GO:0006351	Embryo_16DAP(76.3)
309	MQTL7_5	7	134916785	134917437	Zm00001d020861	Xerico2	GO:0005768, GO:0005802, GO:0016021, GO:0006511, GO:0008270, GO:0016020, GO:0061630, GO:0006623, GO:0006896, GO:0017119	Embryo_16DAP(16.8)
310	MQTL7_6	7	142420831	142427998	Zm00001d021082	Protein_coding	NA	Embryo_16DAP(1.6)
311	MQTL7_6	7	142424651	142424996	Zm00001d001235	LincRNA	NA	NA
312	MQTL7_6	7	142427906	142438706	Zm00001d021084	Gene trap locus 3 [Source:UniProtKB/TrEMBL%3BAcc:B6T7P6]	NA	Embryo_16DAP(26.2)
313	MQTL7_6	7	142427917	142438706	Zm00001d021085	ALBINO3-like protein 1 chloroplastic	NA	Embryo_16DAP(0.9)
314	MQTL7_6	7	142451964	142454359	Zm00001d021086	Transcription factor bHLH137	GO:0005634, GO:0006355, GO:0003700, GO:0046983, GO:0080090, GO:0031326	Embryo_16DAP(34.2)
315	MQTL7_6	7	142482986	142483292	Zm00001d001236	LincRNA	NA	NA
316	MQTL7_6	7	142484402	142493269	Zm00001d021087	Protein_coding	GO:0005515, GO:0005737, GO:0046872, GO:0005096	Embryo_16DAP(19.4)
317	MQTL7_6	7	142495054	142496439	Zm00001d021088	Protein_coding	GO:0003677, GO:0005666, GO:0006383, GO:0005634, GO:0004066, GO:0006529, GO:0001056	Embryo_16DAP(0.2)
318	MQTL7_6	7	142530712	142532073	Zm00001d021089	Protein_coding	GO:0005634, GO:0006355, GO:0003677, GO:0003700, GO:0009873, GO:0006351	Embryo_16DAP(17.3)
319	MQTL7_6	7	142550344	142554948	Zm00001d021090	Chitin elicitor receptor kinase 1	GO:0005524, GO:0004672, GO:0006468, GO:0045087, GO:0019199, GO:0016020, GO:0016740, GO:0000166, GO:0004674, GO:0016301, GO:0016310	Embryo_16DAP(19.5)
320	MQTL7_6	7	142570656	142570728	Zm00001d021091	tRNA	NA	NA
321	MQTL7_6	7	142571325	142571397	Zm00001d021092	tRNA	NA	NA
322	MQTL7_6	7	142601435	142602139	Zm00001d021093	Protein_coding	NA	Embryo_16DAP(6.5)
323	MQTL7_6	7	142612662	142613237	Zm00001d021094	Protein_coding	NA	Embryo_16DAP(10.8)
324	MQTL7_6	7	142661911	142662728	Zm00001d021095	Protein_coding	NA	Embryo_16DAP(12.5)
325	MQTL7_6	7	142725467	142726594	Zm00001d021097	Protein_coding	NA	Embryo_16DAP(0.2)
326	MQTL7_6	7	142794210	142795285	Zm00001d021099	Protein_coding	NA	0
327	MQTL7_6	7	142822913	142823830	Zm00001d021103	Protein_coding	NA	Embryo_16DAP(0.1)
328	MQTL7_6	7	142843160	142846598	Zm00001d021104	Saposin B domain-containing protein	GO:0006629, GO:0016787	Embryo_16DAP(16.6)
329	MQTL7_6	7	142854386	142854894	Zm00001d021105	Nuclear poly(A) polymerase 3	NA	Embryo_16DAP(0.2)
330	MQTL7_6	7	142864554	142865648	Zm00001d021107	Protein_coding	NA	0
331	MQTL7_6	7	142894006	142896483	Zm00001d021109	Protein_coding	GO:0003676, GO:0005737, GO:0090502, GO:0004521, GO:0035194	0
332	MQTL7_6	7	143002308	143011725	Zm00001d021115	Protein_coding	NA	Embryo_16DAP(0.1)
333	MQTL7_6	7	143110186	143111369	Zm00001d021117	Protein_coding	NA	0
334	MQTL7_6	7	143112546	143113076	Zm00001d021118	10A19I.15	NA	0
335	MQTL7_6	7	143115379	143119792	Zm00001d021119	Beta-glucosidase 11	GO:0005975, GO:0004553, GO:0016787, GO:0008422	Embryo_16DAP(103.2)
336	MQTL7_6	7	143199722	143204781	Zm00001d021120	ARM repeat superfamily protein	GO:0005783, GO:0000774	Embryo_16DAP(8.6)
337	MQTL7_6	7	143247045	143247362	Zm00001d001237	LincRNA	NA	NA
338	MQTL7_6	7	143280820	143283847	Zm00001d021122	Cobalt ion binding	GO:0003677, GO:0000724, GO:0005507, GO:0008131, GO:0048038, GO:0009308	Embryo_16DAP(39.3)
339	MQTL7_6	7	143285797	143288834	Zm00001d021123	Plasma membrane	GO:0005634, GO:0045893, GO:0031490, GO:0003713	Embryo_16DAP(96.8)
340	MQTL7_6	7	143311174	143312291	Zm00001d021125	Protein_coding	NA	Embryo_16DAP(0.3)
341	MQTL7_6	7	143316001	143319672	Zm00001d021126	Ankyrin repeat domain-containing protein 2A	GO:0005515, GO:0003723, GO:0043231, GO:0009451, GO:0031359, GO:0045036, GO:0030941, GO:0016020	Embryo_16DAP(70.4)
342	MQTL7_6	7	143327655	143344805	Zm00001d021127	ATP-dependent RNA helicase DRS1	GO:0005524, GO:0003723, GO:0003676, GO:0004386, GO:0003724, GO:0016787, GO:0000166, GO:0005730	Embryo_16DAP(19.8)
343	MQTL8_2	8	72047547	72074493	Zm00001d009591	GBF-interacting protein 1	GO:0005515, GO:0016787, GO:0006508, GO:0008233, GO:0004190, GO:0006629	Embryo_16DAP(30.6)
344	MQTL8_2	8	72088031	72089828	Zm00001d009592	Cell division control protein 48 homolog C	GO:0005524, GO:0016887, GO:0005634, GO:0051301, GO:1990275, GO:0042254, GO:0051973	Whole_seed_14DAP(2.2)
345	MQTL8_2	8	72090945	72095244	Zm00001d009593	Protein_coding	NA	Embryo_22DAP(0.1)
346	MQTL8_2	8	72096954	72103235	Zm00001d009594	Aspartic proteinase A1	GO:0004190, GO:0006629, GO:0006508, GO:0016787, GO:0008233	Leaf_30_DAP_NOPOL(344.4)
347	MQTL8_2	8	72169414	72173597	Zm00001d009595	Protein_coding	GO:0005634, GO:0006355, GO:0003700, GO:0043565, GO:0003677, GO:0050896	Anthers_R1(0.8)
348	MQTL8_2	8	72389684	72393869	Zm00001d009596	Protein_coding	GO:0003723, GO:0005525, GO:0019843, GO:0000028, GO:0006364, GO:0043024, GO:0042644, GO:0042254, GO:0009507, GO:0009536, GO:0000166	Leaf_12_DAP_POL(13.7)
349	MQTL8_2	8	72393934	72400704	Zm00001d009597	FtsJ-like methyltransferase family protein	GO:0008168, GO:0032259, GO:0005634, GO:0005730, GO:0006364, GO:0008649, GO:0016435, GO:0008173, GO:0000463, GO:0030687, GO:0001510, GO:0008650, GO:0031167, GO:0000466, GO:0000453, GO:0016740, GO:0042254	Cob_V18_Immature(15.2)
350	MQTL8_2	8	72400993	72402194	Zm00001d009598	Protein_coding	NA	Leaf_12_DAP_NOPOL(0.1)
351	MQTL8_2	8	72403032	72404407	Zm00001d009599	Protein_coding	GO:0003677, GO:0003700, GO:0006355	Stem_V3(14.2)
352	MQTL8_3	8	78509895	78519823	Zm00001d009733	Pentatricopeptide repeat-containing protein mitochondrial	GO:0005515, GO:0016020	Tassel_V13_Immature(2.5)
353	MQTL8_3	8	78597291	78602479	Zm00001d009735	Pentatricopeptide repeat-containing protein mitochondrial	GO:0005515, GO:0016020	Whole_seed_2DAP(6.6)
354	MQTL8_3	8	79418294	79421379	Zm00001d009747	Protein phosphatase homolog15	GO:0046872, GO:0005634, GO:0005829, GO:0004722, GO:0043169, GO:0006470, GO:0004721, GO:0016787, GO:0035970, GO:0017018	Embryo_16DAP(7)
355	MQTL8_3	8	81867264	81868166	Zm00001d009797	Lactoylglutathione lyase / glyoxalase I family protein	GO:0016829, GO:0016829	Endosperm_16DAP(44.6)
356	MQTL8_4	8	112187739	112189008	Zm00001d010380	Zinc finger CCCH domain-containing protein 23	NA	BraceRoot_Node6_abvgrnd_V13(20.7)
357	MQTL8_5	8	120806361	120811444	Zm00001d010579	Putative calcium-dependent protein kinase family protein	NA	Cob_V18_Immature(25.6)
358	MQTL8_5	8	122764919	122767912	Zm00001d010638	bZIP-transcription factor 96	GO:0005634, GO:0006355, GO:0003700, GO:0009738, GO:0045893, GO:0003677, GO:0016020, GO:0005886, GO:0055085, GO:0046873, GO:0030001	Embryo_24DAP(8.8)
359	MQTL8_5	8	124866876	124869473	Zm00001d010697	Indole-3-acetic acid-amido synthetase GH3.6	GO:0005737, GO:0016881	Tassel_V18_Meiotic(19.2)
360	MQTL8_6	8	125953884	125957239	Zm00001d010724	BSD domain-containing protein	GO:0016020	Leaf_30_DAP_NOPOL(24.5)
361	MQTL8_6	8	125964166	125967235	Zm00001d010725	Protein_coding	NA	Whole_seed_6DAP(18.9)
362	MQTL8_6	8	126043484	126043930	Zm00001d010726	Protein_coding	NA	Whole_seed_18DAP(0.1)
363	MQTL8_6	8	126049914	126051817	Zm00001d010727	BAG family molecular chaperone regulator 8 chloroplastic	GO:0005515, GO:0009506, GO:0006457, GO:0051087	Tassel_V13_Immature(9)
364	MQTL8_6	8	126076102	126078343	Zm00001d010728	PLASMODESMATA CALLOSE-BINDING PROTEIN 2	NA	Embryo_16DAP(212.6)
365	MQTL8_7	8	137997933	138000993	Zm00001d011066	Protein kinase APK1A chloroplastic	GO:0005524, GO:0004672, GO:0004674, GO:0006468, GO:0046872, GO:0016740, GO:0000166, GO:0016301, GO:0016310, GO:0007049, GO:0003824, GO:0051536, GO:0051301, GO:0030488, GO:0070475, GO:0007059, GO:0031262	CrownRoot_Nodes_1_3_V7(24.5)
366	MQTL8_7	8	138001059	138003787	Zm00001d011067	Protein_coding	GO:0009535, GO:0009773, GO:0016730	Leaf_30_DAP_NOPOL(168.3)
367	MQTL8_7	8	138006339	138008714	Zm00001d011068	Protein_coding	GO:0007059, GO:0051301, GO:0007049, GO:0031262, GO:0005634, GO:0005694, GO:0000775, GO:0000776	Leaf_30_DAP_NOPOL(13.1)
368	MQTL8_7	8	138012317	138019459	Zm00001d011069	NAD(P)-binding Rossmann-fold superfamily protein	GO:0009507, GO:0016491	Leaf_12_DAP_POL(44.2)
369	MQTL8_7	8	138014214	138016097	Zm00001d011070	Protein_coding	NA	Cob_V18_Immature(1.2)
370	MQTL8_7	8	138049175	138049510	Zm00001d011072	DVL family protein	GO:0008285, GO:0005886, GO:0048367	Endosperm_16DAP(7.2)
371	MQTL8_7	8	138088618	138089577	Zm00001d011073	AT5g02160	GO:0016021, GO:0009535, GO:0032055, GO:0016020	TapRoot_Z3_7d(52.8)
372	MQTL8_7	8	138093685	138114618	Zm00001d011075	Leukotriene A-4 hydrolase homolog	GO:0003723, GO:0006417, GO:0003729, GO:0005730, GO:0009793, GO:0016020, GO:0043565, GO:0006351, GO:0016787	Cob_V18_Immature(33.3)
373	MQTL8_7	8	138098101	138098929	Zm00001d008104	LincRNA	NA	NA
374	MQTL8_7	8	138160358	138161521	Zm00001d011076	Putative RING zinc finger domain superfamily protein	NA	Embryo_16DAP(2.7)
375	MQTL8_7	8	138325200	138331960	Zm00001d011078	Pumilio homolog 3	NA	Cob_V18_Immature(19.9)
376	MQTL8_8	8	166296568	166300731	Zm00001d012004	Protein_coding	NA	0
377	MQTL8_8	8	166369165	166375273	Zm00001d012005	Putative histidine kinase family protein	GO:0016021, GO:0005886, GO:0007165, GO:0000155, GO:0009736, GO:0000160, GO:0016310, GO:0016772, GO:0016020, GO:0016740, GO:0016301, GO:0004673, GO:0018106	Leaf_30_DAP_NOPOL(23.5)
378	MQTL8_8	8	166416374	166417639	Zm00001d012006	Protein_coding	NA	Endosperm_16DAP(0.1)
379	MQTL8_8	8	166418982	166423965	Zm00001d012007	CBS domain-containing protein CBSCBSPB1	GO:0005515, GO:0016021, GO:0016020	Anthers_R1(178.2)
380	MQTL8_8	8	166447108	166448872	Zm00001d012009	ATP/GTP binding protein-like	NA	Embryo_18DAP(10.8)
381	MQTL8_8	8	166461603	166461962	Zm00001d012010	Protein_coding	GO:0016020	Endosperm_16DAP(6.9)
382	MQTL8_8	8	166469592	166471809	Zm00001d012013	Protein_coding	NA	Endosperm_22DAP(1.3)
383	MQTL8_8	8	166472298	166473167	Zm00001d012014	Protein_coding	GO:0003677	TapRoot_Z3_7d(0.1)
384	MQTL8_8	8	166514041	166517345	Zm00001d012015	Protein_coding	GO:0005634, GO:0003677, GO:0046872	WholeRootSystem_7d(5.7)
385	MQTL8_8	8	166534607	166536143	Zm00001d012016	F-box protein	GO:0005515, GO:0046872	Embryo_16DAP(11.7)
386	MQTL8_8	8	166554917	166558182	Zm00001d012017	Mitochondrial import receptor subunit TOM20-4	GO:0005515, GO:0016021, GO:0005742, GO:0045040, GO:0016020	Embryo_24DAP(96.3)
387	MQTL8_8	8	166620718	166622319	Zm00001d012019	SNF1-related protein kinase regulatory subunit gamma-1	GO:0016301, GO:0016310	Anthers_R1(22.6)
388	MQTL8_8	8	166623987	166626005	Zm00001d012020	Exocyst subunit exo70 family protein F1	GO:0005546, GO:0006887, GO:0000145, GO:0015031	Silks_R1(2.4)
389	MQTL8_8	8	166633645	166635165	Zm00001d012021	Nucleotide-diphospho-sugar transferase family protein	GO:0016020, GO:0016740	TapRoot_Z1_7d(5)
390	MQTL8_8	8	166711119	166712722	Zm00001d012022	Nucleotide-diphospho-sugar transferase family protein	GO:0016740	Whole_seed_6DAP(14.1)
391	MQTL8_8	8	166714862	166715389	Zm00001d012023	Regulatory protein	GO:0003690, GO:0016020, GO:0006265	Tassel_V18_Meiotic(0.1)
392	MQTL8_8	8	166720734	166727134	Zm00001d012024	Nucleotide-diphospho-sugar transferase family protein	GO:0003690, GO:0016020, GO:0016740, GO:0006265	Leaf_30_DAP_POL(0.8)
393	MQTL8_8	8	166729021	166729938	Zm00001d012025	Selenium-binding protein 3	NA	0
394	MQTL8_8	8	166735156	166735352	ENSRNA049475586	snRNA	NA	NA
395	MQTL8_8	8	166745975	166755465	Zm00001d012027	Dynamin-related protein 3A	GO:0005525, GO:0003924, GO:0005737, GO:0016020, GO:0000166, GO:0005874, GO:0008017	Whole_seed_10DAP(22.3)
396	MQTL8_8	8	166753900	166753971	Zm00001d012028	tRNA	NA	NA
397	MQTL8_8	8	166757788	166769178	Zm00001d012029	S-adenosyl-L-methionine-dependent methyltransferases superfamily protein	GO:0006396, GO:0008173, GO:0016740, GO:0008168, GO:0001510, GO:0032259	Leaf_12_DAP_POL(19.9)
398	MQTL8_8	8	166780698	166784066	Zm00001d012030	E2 protein isoform 5	GO:0005643, GO:0045893, GO:0006406, GO:0003713, GO:0006368, GO:0000124, GO:0016578, GO:0070390, GO:0071819, GO:0005634, GO:0015031, GO:0006325, GO:0005654, GO:0051028, GO:0043229	CrownRoot_Nodes_1_3_V7(17.8)
399	MQTL8_8	8	166790119	166792274	Zm00001d012031	Protein_coding	NA	CrownRoot_Nodes_1_3_V7(27.8)
400	MQTL8_8	8	166819383	166835118	Zm00001d012032	Transcription factor TFIIE alpha subunit	GO:0016020, GO:0005673, GO:0001113	Cob_V18_Immature(14.8)
401	MQTL8_8	8	166838901	166842661	Zm00001d012033	Protein_coding	GO:0046872, GO:0009570, GO:0016491, GO:0006631, GO:0006633, GO:0045300, GO:0006629	Embryo_18DAP(292.6)
402	MQTL8_8	8	166861044	166902381	Zm00001d012034	N-acetylglucosaminyl transferase component family protein / Gpi1 family protein	GO:0016020, GO:0006506, GO:0016740, GO:0016757, GO:0016021, GO:0017176	Leaf_30_DAP_NOPOL(8.2)
403	MQTL8_8	8	166899645	166899906	Zm00001d008136	LincRNA	NA	NA
404	MQTL8_8	8	166903610	166906333	Zm00001d012035	Whole genome shotgun sequence of line PN40024 scaffold_35.assembly12x (Fragment)	GO:0016021, GO:0016020	Leaf_30_DAP_POL(1.8)
405	MQTL8_8	8	166917606	166923260	Zm00001d012036	Protein_coding	GO:0016757, GO:0005986, GO:0016157, GO:0046524, GO:0005985, GO:0016740, GO:0003824	Leaf_24_DAP_POL(363.3)
406	MQTL8_8	8	166933875	166937620	Zm00001d012038	Protein_coding	NA	Anthers_R1(140.3)
407	MQTL8_8	8	167025708	167029182	Zm00001d012040	Protein CPR-5	GO:0006952, GO:0010150, GO:0010090, GO:0016021, GO:0016020	Anthers_R1(12.1)
408	MQTL8_8	8	167029388	167031334	Zm00001d012041	Protein_coding	NA	Whole_seed_6DAP(2.8)
409	MQTL8_8	8	167077414	167081392	Zm00001d012042	Protein_coding	GO:0005515, GO:0005634	Embryo_16DAP(215)
410	MQTL8_8	8	167096675	167099930	Zm00001d012043	Protein XRI1	NA	Cob_V18_Immature(6.6)
411	MQTL8_8	8	167187771	167190749	Zm00001d012044	Protein_coding	GO:0005515, GO:0005634, GO:0016925, GO:0031386, GO:0044389	Leaf_30_DAP_NOPOL(265.9)
412	MQTL8_8	8	167198280	167199179	Zm00001d012045	Putative RING zinc finger domain superfamily protein	NA	Anthers_R1(9.2)
413	MQTL8_8	8	167201109	167202412	Zm00001d012047	Wiscott-Aldrich syndrome	NA	WholePrimaryRoot_7d(3.9)
414	MQTL8_8	8	167205232	167221108	Zm00001d012048	Putative leucine-rich repeat receptor-like protein kinase family protein	GO:0005515, GO:0016020, GO:0005524, GO:0004672, GO:0006468, GO:0000166, GO:0016301, GO:0016310, GO:0004674	0
415	MQTL8_9	8	175846051	175866846	Zm00001d012511	Protein kinase family protein with ARM repeat domain	GO:0005524, GO:0004672, GO:0006468, GO:0016301, GO:0016310	Silks_R1(31.8)
416	MQTL8_9	8	175868426	175870258	Zm00001d012512	Protein_coding	GO:1900150, GO:0016740	Leaf_24_DAP_POL(0.5)
417	MQTL8_9	8	175871642	175876540	Zm00001d012513	Ubiquitin-conjugating enzyme E2 11	GO:0016740, GO:0005524, GO:0000166, GO:0006511, GO:0005634, GO:0000209, GO:0061631	Silks_R1(123.5)
418	MQTL8_9	8	175887579	175890704	Zm00001d012514	Probable inactive receptor kinase	GO:0005515, GO:0016021, GO:0005524, GO:0004672, GO:0006468, GO:0016020, GO:0000166, GO:0016301, GO:0016310	Silks_R1(29.8)
419	MQTL8_9	8	175898933	175903845	Zm00001d012515	Proline-rich family protein	GO:0043622, GO:0055028	Leaf_30_DAP_NOPOL(31.3)
420	MQTL8_9	8	175931640	175934827	Zm00001d012516	Protein_coding	GO:0005634, GO:0003677, GO:0003700, GO:0006355	Embryo_24DAP(4.9)
421	MQTL8_9	8	175969428	175975434	Zm00001d012517	KH domain-containing protein	GO:0005634, GO:0003723, GO:0003729, GO:0003676, GO:0000381, GO:0048024	Stem_V3(3.6)
422	MQTL8_9	8	176004430	176009389	Zm00001d012518	Protein_coding	GO:0005737, GO:0046872, GO:0003824, GO:0006096, GO:0004619, GO:0030145, GO:0006007, GO:0016787, GO:0003676, GO:0003723, GO:0005524, GO:0000166, GO:0004386, GO:0016853, GO:0005730, GO:0005975, GO:0046537	Embryo_18DAP(235.6)
423	MQTL8_9	8	176016314	176016934	Zm00001d012520	Protein LURP-one-related 8	NA	Anthers_R1(2.1)
424	MQTL8_9	8	176021482	176024817	Zm00001d012521	Cation/H(+) antiporter 15	GO:0016021, GO:0006812, GO:0016020, GO:0009941, GO:0055085, GO:0012505, GO:0015299, GO:0015672, GO:0006885	Anthers_R1(10.5)
425	MQTL8_9	8	176046167	176049646	Zm00001d012522	Calcium uniporter protein 5 mitochondrial	GO:0036444, GO:0051560, GO:1990246, GO:0031305, GO:0005262, GO:0015292, GO:0016020, GO:0005739, GO:0006811, GO:0006816, GO:0070588, GO:0005743	Anthers_R1(78.4)
426	MQTL8_9	8	176056171	176056480	Zm00001d008157	LincRNA	NA	NA
427	MQTL8_9	8	176060117	176062979	Zm00001d012524	SKU5 similar 13	GO:0016491, GO:0005507	Anthers_R1(404.7)
428	MQTL8_9	8	176068190	176095819	Zm00001d012525	Protein MOR1	GO:0005737, GO:0051010, GO:0046785, GO:0030951, GO:0007051, GO:0061863, GO:0016043, GO:0043232, GO:0099080, GO:0008017, GO:0000776, GO:0007052, GO:0035371, GO:0000922	Anthers_R1(33.3)
429	MQTL8_9	8	176069539	176069611	Zm00001d012526	tRNA	NA	NA
430	MQTL8_9	8	176102703	176103334	Zm00001d008158	LincRNA	NA	NA
431	MQTL8_9	8	176104082	176105842	Zm00001d012527	Protein_coding	GO:0006355, GO:0003677	Anthers_R1(15.7)
432	MQTL8_9	8	176106383	176108142	Zm00001d012528	Pentatricopeptide repeat-containing protein mitochondrial	GO:0005515	Anthers_R1(3.4)
433	MQTL8_9	8	176119291	176123198	Zm00001d012529	Zinc finger protein VAR3 chloroplastic	GO:0046872, GO:0009658, GO:0009570, GO:1900871, GO:0003729, GO:0005737	Anthers_R1(6)
434	MQTL8_9	8	176195066	176195707	Zm00001d012530	Ribosomal protein L34e superfamily protein	GO:0016021, GO:0005840, GO:0016020	Leaf_18_DAP_NOPOL(2.6)
435	MQTL8_9	8	176198185	176199816	Zm00001d012531	Putative NADH-cytochrome B5 reductase family protein	NA	Endosperm_16DAP(0.1)
436	MQTL8_9	8	176203820	176207127	Zm00001d012532	Protein_coding	NA	Anthers_R1(78.2)
437	MQTL8_9	8	176249618	176251923	Zm00001d012533	Protein_coding	NA	Tassel_V13_Immature(0.4)
438	MQTL8_9	8	176254330	176258415	Zm00001d012534	Putative inositol polyphosphate phosphatase (Synaptogenin-like) family protein	GO:0003824, GO:0046856, GO:0016791, GO:0004445, GO:0016787, GO:0004439, GO:0034485	Anthers_R1(5.1)
439	MQTL8_9	8	176258816	176260070	Zm00001d012535	Putative bifunctional inhibitor/LTP/seed storage protein family	GO:0016021, GO:0016020	Silks_R1(26.2)
440	MQTL8_9	8	176311492	176316730	Zm00001d012536	Vacuolar protein sorting-associated protein 36	GO:0043130, GO:0000814, GO:0032509, GO:0043328, GO:0031902, GO:0032266, GO:0005737, GO:0015031, GO:0005768, GO:0016787, GO:0005524, GO:0000166, GO:0004386, GO:0006508, GO:0006281, GO:0006310, GO:0006974, GO:0016887, GO:0008234, GO:0003678, GO:0000723, GO:0032508	Tassel_V13_Immature(6.7)
441	MQTL8_9	8	176319099	176327611	Zm00001d012537	ADP-ribosylation factor A1F	GO:0005525, GO:0003924, GO:0000166, GO:0015031, GO:0005794, GO:0016192	CrownRoot_Nodes_1_3_V7(184.5)
442	MQTL8_9	8	176375165	176376142	Zm00001d012538	ABSCISIC ACID-INSENSITIVE 5-like protein 2	GO:0005634, GO:0003700, GO:0045893	Cob_V18_Immature(1.4)
443	MQTL8_9	8	176387457	176388488	Zm00001d012539	Protein RETICULATA-RELATED 3 chloroplastic	GO:0016021, GO:0031969, GO:0016020	Embryo_16DAP(152.7)
444	MQTL8_9	8	176400030	176402995	Zm00001d012540	Protein_coding	NA	Whole_seed_6DAP(0.4)
445	MQTL8_9	8	176406745	176407884	Zm00001d012542	Transducin/WD40 repeat-like superfamily protein	NA	Cob_V18_Immature(0.1)
446	MQTL8_9	8	176418688	176418996	Zm00001d012543	Protein_coding	NA	Endosperm_16DAP(13.7)
447	MQTL8_9	8	176420877	176424706	Zm00001d012544	Protein_coding	GO:0003677	Tassel_V18_Meiotic(11.1)
448	MQTL8_9	8	176434645	176435040	Zm00001d012545	Serine-type endopeptidase inhibitor	GO:0016021, GO:0016020	Embryo_16DAP(7.5)
449	MQTL8_9	8	176436045	176440104	Zm00001d012546	Proteasome subunit alpha type-3	GO:0005737, GO:0006511, GO:0005634, GO:0004298, GO:0019773, GO:0005839, GO:0051603, GO:0000502	Silks_R1(50.8)
450	MQTL8_9	8	176464315	176465577	Zm00001d012548	Ribonuclease III domain-containing protein RNC1 chloroplastic	NA	0
451	MQTL8_9	8	176466250	176469340	Zm00001d012549	Probable U3 small nucleolar RNA-associated protein 11	GO:0032040, GO:0006364, GO:0005634, GO:0005730, GO:0009561	Stem_V1(27.7)
452	MQTL8_9	8	176472551	176477257	Zm00001d012550	Leucine-rich repeat (LRR) family protein	GO:0005515, GO:0016301, GO:0016310	Whole_seed_6DAP(90.9)
453	MQTL8_9	8	176482256	176483443	Zm00001d012551	Protein_coding	GO:0051091	Whole_seed_6DAP(13.4)
454	MQTL8_9	8	176491832	176494914	Zm00001d012552	Putative calcium-dependent protein kinase family protein	GO:0005737, GO:0005524, GO:0004672, GO:0005634, GO:0006468, GO:0035556, GO:0005509, GO:0018105, GO:0005516, GO:0046777, GO:0009931, GO:0046872, GO:0016740, GO:0000166, GO:0016301, GO:0016310, GO:0004683	Anthers_R1(178.7)
455	MQTL8_9	8	176514160	176521162	Zm00001d012553	Octopine synthase binding factor4	GO:0006355, GO:0003700, GO:0043565, GO:0006351, GO:0003677	CrownRoot_Nodes_1_3_V7(20.1)
456	MQTL8_9	8	176575537	176575661	ENSRNA049455185	snRNA	NA	NA
457	MQTL8_9	8	176575921	176576703	Zm00001d012555	Protein MIZU-KUSSEI 1	GO:0010274	Embryo_16DAP(0.2)
458	MQTL8_9	8	176577453	176580718	Zm00001d012556	Protein_coding	GO:0005737, GO:0005525, GO:0003924, GO:0005874, GO:0000278, GO:0005200, GO:0000226, GO:0007017, GO:0000166, GO:0005856, GO:0007010	Silks_R1(128.1)
459	MQTL8_9	8	176581701	176584547	Zm00001d012557	DNA-directed RNA polymerases II and IV subunit 5A	GO:0003677, GO:0003899, GO:0006351, GO:0005634, GO:0005666, GO:0005736, GO:0005665, GO:0006366, GO:0001055, GO:0006360, GO:0006383, GO:0001054, GO:0001056, GO:0055029, GO:0000428	WholeRootSystem_7d(79.6)
460	MQTL8_9	8	176632409	176646619	Zm00001d012559	Stomatal closure-related actin-binding protein 1	NA	Leaf_18_DAP_POL(63.4)
461	MQTL8_9	8	176648813	176651657	Zm00001d012560	Protein_coding	GO:0005737, GO:0005634, GO:0000307, GO:0051301, GO:0016538, GO:0000079, GO:0044772, GO:0007049, GO:0003779, GO:0007015, GO:0010119	Cob_V18_Immature(54.1)
462	MQTL8_9	8	176655420	176657307	Zm00001d012561	Protein_coding	GO:0004869, GO:0030414, GO:0010466	Leaf_30_DAP_NOPOL(672)
463	MQTL8_9	8	176682155	176683237	Zm00001d012562	Probable sugar phosphate/phosphate translocator	GO:0005768, GO:0005802, GO:0005794, GO:0016021, GO:0022857, GO:0015297, GO:0016020, GO:0055085	Embryo_16DAP(12.8)
464	MQTL8_9	8	176683821	176684273	Zm00001d012563	Protein_coding	NA	Embryo_16DAP(2.5)
465	MQTL8_9	8	176755046	176762074	Zm00001d012564	Probable E3 ubiquitin-protein ligase RHC1A	NA	Tassel_V18_Meiotic(32)
466	MQTL8_9	8	176768297	176771649	Zm00001d012566	BEST Arabidopsis thaliana protein match is: mucin-related (TAIR:AT2G02880.1)%3B Has 35333 Blast hits to 34131 proteins in 2444 species: Archae - 798%3B Bacteria - 22429%3B Metazoa - 974%3B Fungi - 991%3B Plants - 531%3B Viruses - 0%3B Other Eukaryotes - 9610 (sou /.../CBI BLink).	NA	Anthers_R1(2)
467	MQTL8_9	8	176775799	176779233	Zm00001d012567	Protein_coding	GO:0005975, GO:0005829, GO:0051287, GO:0016491, GO:0016616, GO:0004367, GO:0006072, GO:0009331, GO:0006116, GO:0046168, GO:0047952	Anthers_R1(97.7)
468	MQTL8_9	8	176781292	176785729	Zm00001d012568	Putative O-Glycosyl hydrolase superfamily protein	GO:0005975, GO:0046658, GO:0004553, GO:0016787, GO:0016798, GO:0008152	Tassel_V18_Meiotic(0.1)
469	MQTL8_9	8	176786650	176789645	Zm00001d012569	Protein_coding	NA	Endosperm_16DAP(2.4)
470	MQTL8_10	8	178411857	178414647	Zm00001d012675	Protein_coding	GO:0005737, GO:0004364, GO:0043295, GO:0016740, GO:0006749, GO:0009751, GO:0042542, GO:0032991, GO:0009635, GO:0000302, GO:0009410, GO:0009636	CrownRoot_Node5_V7(2475)
471	MQTL8_10	8	178444578	178446175	Zm00001d012676	Protein_coding	NA	Anthers_R1(15.1)
472	MQTL8_10	8	178446315	178457867	Zm00001d012677	Glycerophosphodiester phosphodiesterase GDPD5	GO:0006629, GO:0008889, GO:0006071, GO:0008081, GO:0006887, GO:0000145, GO:0005546	Cob_R1_Pre_pollination(48.4)
473	MQTL8_10	8	178461024	178461103	Zm00001d012678	tRNA	NA	NA
474	MQTL8_10	8	178499451	178502466	Zm00001d012679	Protein_coding	NA	Embryo_16DAP(59.9)
475	MQTL9_1	9	10942420	10945088	Zm00001d045044	AP2-EREBP-transcription factor 160	GO:0005634, GO:0006355, GO:0003677, GO:0003700, GO:0009873, GO:0006351	WholeRootSystem_3d(88.6)
476	MQTL9_3	9	98458436	98460079	Zm00001d046603	Putative cytochrome P450 superfamily protein	GO:0016021, GO:0020037, GO:0005506, GO:0004497, GO:0016705, GO:0046872, GO:0016020, GO:0016491, GO:0071704	WholeRootSystem_3d(3)
477	MQTL9_5	9	133526989	133528220	Zm00001d047523	Probable WRKY transcription factor 30	GO:0006355, GO:0003700, GO:0043565, GO:0005634, GO:0003677, GO:0050896	WholeRootSystem_3d(2.1)
478	MQTL9_5	9	135498629	135502493	Zm00001d047559	Putative homeobox DNA-binding domain superfamily protein	GO:0005634, GO:0003677, GO:0003700, GO:0048830, GO:0006355	WholeRootSystem_3d(17.1)
479	MQTL9_5	9	135613729	135615657	Zm00001d047563	Ethylene insensitive-like1	GO:0005634, GO:0003677, GO:0003700, GO:0009873, GO:0006355	WholeRootSystem_3d(45.5)
480	MQTL9_5	9	135816674	135817471	Zm00001d047567	Embryonic cell protein 63	GO:1902584, GO:0050826, GO:1901002, GO:0005634	WholeRootSystem_3d(93.9)
481	MQTL9_8	9	150279277	150284593	Zm00001d048102	Peptidase beta subunit	GO:0046872, GO:0005739, GO:0004222, GO:0006508	WholeRootSystem_3d(98.9)
482	MQTL9_8	9	150281689	150281760	Zm00001d048103	tRNA	NA	NA
483	MQTL9_8	9	150285885	150288797	Zm00001d048104	TPX2 (targeting protein for Xklp2) protein family	GO:0005874, GO:0005819, GO:0060236, GO:0032147, GO:0005737, GO:0005856, GO:0008017, GO:0030295, GO:0090307, GO:0005880	WholeRootSystem_3d(8.4)
484	MQTL9_8	9	150290243	150292984	Zm00001d048105	Putative MYB DNA-binding domain superfamily protein	GO:0003677	WholeRootSystem_3d(27.9)
485	MQTL9_8	9	150335361	150336881	Zm00001d048106	UDP-glycosyltransferase 73B3	NA	WholeRootSystem_3d(0.8)
486	MQTL9_8	9	150339499	150341200	Zm00001d048107	Protein_coding	NA	0
487	MQTL9_8	9	150346816	150354942	Zm00001d048108	Protein_coding	NA	WholeRootSystem_3d(5.2)
488	MQTL9_8	9	150356874	150359747	Zm00001d048109	Remorin family protein	NA	WholeRootSystem_3d(6.7)
489	MQTL9_8	9	150360031	150360465	Zm00001d048110	Transferasesfolic acid binding	NA	WholeRootSystem_3d(18)
490	MQTL9_8	9	150369842	150372175	Zm00001d048111	Plant calmodulin-binding protein-related	GO:0005516	WholeRootSystem_3d(27.9)
491	MQTL9_8	9	150377793	150378578	Zm00001d048112	Protein_coding	GO:0016021, GO:0046872, GO:0016020, GO:0016740, GO:0140096	WholeRootSystem_3d(24.1)
492	MQTL9_8	9	150381962	150382826	Zm00001d048113	DNA-directed RNA polymerase subunit beta'	GO:0003899, GO:0000428	WholeRootSystem_3d(2.2)
493	MQTL9_8	9	150383718	150390329	Zm00001d048114	40S ribosomal protein S23-2	NA	WholeRootSystem_3d(1.9)
494	MQTL9_8	9	150393785	150408118	Zm00001d048115	Nucleotidyltransferases	GO:0016779, GO:0016740	WholeRootSystem_3d(23.3)
495	MQTL9_8	9	150407996	150409201	Zm00001d048116	Protein_coding	NA	Leaf_12_DAP_POL(92.7)
496	MQTL9_8	9	150410615	150412981	Zm00001d048117	Cp protein	NA	Embryo_18DAP(20)
497	MQTL9_8	9	150475824	150486585	Zm00001d048119	Tetratricopeptide repeat (TPR)-like superfamily protein	GO:0005515, GO:0006396, GO:0005685, GO:0071004, GO:0000395, GO:0000243, GO:0030627	Cob_V18_Immature(41.9)
498	MQTL9_8	9	150483618	150483691	Zm00001d048120	tRNA	NA	NA
499	MQTL9_8	9	150487772	150489728	Zm00001d048121	Myosin heavy chain	NA	Embryo_24DAP(1)
500	MQTL9_8	9	150491614	150495368	Zm00001d048122	Got1/Sft2-like vescicle transport protein family	GO:0016021, GO:0000139, GO:0016192, GO:0006888, GO:0042147, GO:0016020, GO:0005829	TapRoot_Z1_7d(16.3)
501	MQTL9_8	9	150498053	150498481	Zm00001d048123	Protein_coding	GO:0000278, GO:0048527, GO:0005634	Stem_V1(1.9)
502	MQTL9_8	9	150501725	150501797	Zm00001d048124	tRNA	NA	NA
503	MQTL9_8	9	150502621	150502693	Zm00001d048125	tRNA	NA	NA
504	MQTL9_8	9	150505987	150511249	Zm00001d048126	Mannose-1-phosphate guanylyltransferase 1	GO:0009058, GO:0016779, GO:0016740, GO:0005737, GO:0008878	Whole_seed_2DAP(26.7)
505	MQTL9_8	9	150511914	150520610	Zm00001d048127	Putative cyclin-A3-1	GO:0051301, GO:0007049, GO:0005634, GO:0005737, GO:0015979, GO:0000307, GO:0003824, GO:0016538, GO:0000079, GO:0044772	Anthers_R1(11.9)
506	MQTL9_8	9	150529019	150532996	Zm00001d048129	Metal transporter Nramp3	GO:0016021, GO:0046873, GO:0016020, GO:0005384, GO:0030001, GO:0015086, GO:0071421, GO:0070574	CrownRoot_Nodes_1_3_V7(70.8)
507	MQTL9_9	9	154536750	154537162	Zm00001d048327	Protein_coding	NA	Leaf_30_DAP_POL(32.7)
508	MQTL9_9	9	154537516	154537587	Zm00001d048328	tRNA	NA	NA
509	MQTL9_9	9	154553978	154561542	Zm00001d048329	ABC transporter C family member 3	GO:0016021, GO:0005524, GO:0016020, GO:0005774, GO:0042626, GO:0016887, GO:0055085, GO:0000325, GO:0140359, GO:0000166	Leaf_30_DAP_POL(30)
510	MQTL9_9	9	154555163	154555234	Zm00001d048330	tRNA	NA	NA
511	MQTL9_9	9	154556237	154556309	Zm00001d048331	tRNA	NA	NA
512	MQTL9_9	9	154587390	154589003	Zm00001d048332	Pentatricopeptide repeat-containing protein	GO:0005515, GO:0009507, GO:0003723, GO:0009451, GO:1900865	Tassel_V18_Meiotic(1.8)
513	MQTL9_9	9	154591704	154593654	Zm00001d048333	DUF1997 family protein	GO:0003723, GO:0009451	Leaf_30_DAP_NOPOL(317)
514	MQTL9_9	9	154593581	154596022	Zm00001d048334	Whole genome shotgun sequence of line PN40024 scaffold_113.assembly12x (Fragment)	NA	Leaf_30_DAP_NOPOL(349.8)
515	MQTL9_9	9	154618004	154622654	Zm00001d048335	Major facilitator superfamily protein	GO:0016020, GO:0008643, GO:0015293, GO:0055085, GO:0071702	Leaf_30_DAP_NOPOL(73.9)
516	MQTL9_9	9	154661166	154667108	Zm00001d048336	Serine/threonine-protein phosphatase	GO:0016787, GO:0004722, GO:0046872, GO:0005829, GO:0000278, GO:0017018	Leaf_12_DAP_NOPOL(88.3)
517	MQTL9_9	9	154667073	154670341	Zm00001d048337	Fatty acyl-CoA reductase 2	GO:0080019, GO:0009507, GO:0009635, GO:0010584, GO:1903175, GO:0009556, GO:0006629, GO:0016491, GO:0043231, GO:0102965, GO:0010345, GO:0035336, GO:0016620	Tassel_V18_Meiotic(184.3)
518	MQTL9_9	9	154675604	154690065	Zm00001d048338	Calcium-binding EF hand family protein	GO:0005515, GO:0005509, GO:0005737, GO:0005886, GO:0043231, GO:0006897, GO:0016197	Whole_seed_6DAP(29)
519	MQTL9_9	9	154752983	154759049	Zm00001d048340	DNA-binding bromodomain-containing protein	GO:0005515, GO:0003677	Leaf_0_DAP_NOPOL(3.1)
520	MQTL9_9	9	154764664	154768595	Zm00001d048341	Protein kinase superfamily protein	GO:0005524, GO:0004672, GO:0004674, GO:0006468, GO:0016740, GO:0000166, GO:0016301, GO:0016310, GO:0016021, GO:0016020	Cob_R1_Pre_pollination(10.3)
521	MQTL9_9	9	154782716	154785521	Zm00001d048342	Probable serine/threonine-protein kinase Cx32 chloroplastic	GO:0005524, GO:0004672, GO:0004674, GO:0006468, GO:0016740, GO:0000166, GO:0016301, GO:0016310	CrownRoot_Node5_V13(3.6)
522	MQTL9_9	9	154791159	154796710	Zm00001d048343	Ubiquitin domain-containing protein DSK2b	GO:0005515, GO:0006511, GO:0005829, GO:0031593, GO:0005634	Silks_R1(64)
523	MQTL9_9	9	154803800	154805750	Zm00001d048344	Expansin-like A2	GO:0005576	Silks_R1(41.7)
524	MQTL9_9	9	154813756	154818120	Zm00001d048345	Probable serine/threonine-protein kinase	GO:0005515, GO:0005524, GO:0004672, GO:0005886, GO:0006468, GO:0009742, GO:0016020, GO:0016301, GO:0016310	Leaf_30_DAP_NOPOL(12.3)
525	MQTL9_9	9	154820912	154823371	Zm00001d048346	Protein_coding	NA	Embryo_16DAP(244.1)
526	MQTL9_9	9	154824112	154825475	Zm00001d048347	Protein_coding	GO:0006355, GO:0003677	WholeRootSystem_3d(1.3)
527	MQTL9_9	9	154834549	154834905	Zm00001d048348	transcription activator-related	NA	BraceRoot_Node6_abvgrnd_V13(11.4)
528	MQTL9_9	9	154838128	154843210	Zm00001d048349	Protein_coding	GO:0009570, GO:2001070, GO:0043036, GO:2000904	Leaf_18_DAP_POL(31.4)
529	MQTL9_9	9	154856188	154857395	Zm00001d048352	IQ-domain 20	NA	WholeRootSystem_3d(1.7)
530	MQTL9_9	9	154861537	154862959	Zm00001d048353	Protein_coding	GO:0005737, GO:0004364, GO:0043295, GO:0016740, GO:0006749, GO:0009636	CrownRoot_Node5_V7(16.2)
531	MQTL9_9	9	154871684	154872915	Zm00001d048354	Glutathione S-transferase F9	GO:0005737, GO:0004364, GO:0043295, GO:0016740, GO:0006749, GO:0009636	CrownRoot_Node5_V7(41.4)
532	MQTL9_9	9	154875197	154878470	Zm00001d048355	F-box/LRR-repeat protein 10	GO:0005515, GO:0031146, GO:0006511, GO:0019005	Cob_R1_Pre_pollination(11.9)
533	MQTL9_9	9	154883684	154884796	Zm00001d048356	24-methylenesterol C-methyltransferase 2	NA	Embryo_16DAP(94.4)
534	MQTL9_9	9	154910740	154914399	Zm00001d048357	Putative leucine-rich repeat receptor-like protein kinase family protein	GO:0005515, GO:0005524, GO:0004672, GO:0006468	Stem_V1(0.3)
535	MQTL9_9	9	154915042	154923673	Zm00001d048358	Protein_coding	GO:0046872, GO:0005829, GO:0005739, GO:0051539, GO:0003994, GO:0047780, GO:0006099, GO:0006101, GO:0051536, GO:0016829, GO:0006807, GO:0016836, GO:0043436, GO:0030350	Anthers_R1(113.1)
536	MQTL9_9	9	154975226	154979466	Zm00001d048359	Probable protein phosphatase 2C 48	NA	TapRoot_Z3_7d(22.5)
537	MQTL9_9	9	154979698	154983190	Zm00001d048360	Protein_coding	GO:0016021, GO:0016020, GO:0031969	Leaf_12_DAP_POL(33.4)
538	MQTL9_9	9	155107951	155110341	Zm00001d048361	CSC1-like protein	GO:0016021, GO:0005886, GO:0005227, GO:0016020, GO:0006623, GO:0055085, GO:0006811, GO:0098655, GO:0008308, GO:0098656, GO:0005741, GO:0043227	Leaf_30_DAP_NOPOL(9.8)
539	MQTL9_9	9	155112476	155116062	Zm00001d048362	Mitochondrial outer membrane protein porin 4	GO:0005741, GO:0008308, GO:0055085, GO:0098656, GO:0016020, GO:0043227	BraceRoot_Node6_abvgrnd_V13(17.8)
540	MQTL9_9	9	155124086	155127652	Zm00001d048363	Protein_coding	GO:0005634, GO:0016301, GO:0007050, GO:0004861, GO:0045736, GO:0051726, GO:0016310, GO:0004860	Cob_V18_Immature(10.8)
541	MQTL9_9	9	155131090	155139010	Zm00001d048364	RNA-binding (RRM/RBD/RNP motifs) family protein	GO:0003723, GO:0003676, GO:0005634, GO:0006397, GO:0008380, GO:0016607, GO:0071004, GO:0008187, GO:0030628, GO:0000243, GO:0089701	Cob_V18_Immature(18.4)
542	MQTL9_9	9	155189793	155191697	Zm00001d048366	Expressed protein%3B protein	GO:0007142, GO:0007142	Embryo_16DAP(28.2)
543	MQTL9_9	9	155194147	155194217	ENSRNA049450621	tRNA	NA	NA
544	MQTL9_9	9	155194147	155194217	Zm00001d048367	tRNA	NA	NA
545	MQTL9_9	9	155195026	155197492	Zm00001d048368	60S ribosomal protein L23	GO:0006412, GO:0003735, GO:0003735, GO:0005840, GO:0022625, GO:0070180, GO:1990904	Embryo_16DAP(656.4)
546	MQTL9_9	9	155203371	155205823	Zm00001d048369	CCT motif family protein	GO:0005515, GO:0005634, GO:0009909	Anthers_R1(28.4)
547	MQTL9_9	9	155213235	155214866	Zm00001d048370	Putative cytochrome P450 superfamily protein	GO:0020037, GO:0005506, GO:0004497, GO:0016705, GO:0046872, GO:0016491, GO:0071704	Leaf_30_DAP_NOPOL(14.6)
548	MQTL9_9	9	155230812	155234902	Zm00001d048372	Glutamyl-tRNA synthetase%252C cytoplasmic	GO:0043039, GO:0005737, GO:0005524, GO:0005829, GO:0006412, GO:0004812, GO:0006425, GO:0004819, GO:0000166, GO:0006418, GO:0006424, GO:0004818, GO:0016874, GO:0003824, GO:0009791, GO:0048608, GO:0017102, GO:0046872, GO:0016702, GO:0051213	Leaf_24_DAP_NOPOL(18.9)
549	MQTL9_9	9	155236300	155242285	Zm00001d048373	Protein_coding	GO:0005794, GO:0009507, GO:0046872, GO:0009506, GO:0005886, GO:0009570, GO:0005774, GO:0016121, GO:0010436, GO:0016702, GO:0016124, GO:0045549, GO:0005524, GO:0000166, GO:0016874, GO:0006412, GO:0005737, GO:0004812, GO:0006418, GO:0051213, GO:0043039, GO:0004818, GO:0006424, GO:0009791, GO:0048608, GO:0016118	Leaf_0_DAP_NOPOL(245.7)
550	MQTL9_9	9	155252943	155254133	Zm00001d048374	Carboxyl-terminal-processing peptidase 1 chloroplastic	NA	Leaf_30_DAP_POL(0.4)
551	MQTL9_9	9	155253906	155255420	Zm00001d048375	Protein_coding	GO:0043565, GO:0000724, GO:0006281, GO:0006268, GO:0003684, GO:0006289, GO:0003697, GO:0005662, GO:0000723, GO:0006261, GO:0007004, GO:0043047, GO:0051321	Endosperm_18DAP(0.1)
552	MQTL9_9	9	155256628	155260667	Zm00001d048376	Sec20 family protein	GO:0016021, GO:0005783, GO:0005484, GO:0031201, GO:0006890, GO:0016020, GO:0061025	Leaf_12_DAP_POL(0.2)
553	MQTL9_9	9	155263906	155266922	Zm00001d048378	PIF1 helicase	NA	0
554	MQTL9_9	9	155270769	155273709	Zm00001d048379	Protein_coding	NA	0
555	MQTL9_9	9	155274681	155276770	Zm00001d048380	Guanylyl cyclase 1	NA	0
556	MQTL9_9	9	155280870	155281917	Zm00001d048381	ATP sulfurylase 1 chloroplastic	GO:0004781	CrownRoot_Nodes_1_3_V7(18.7)
557	MQTL9_9	9	155283825	155285857	Zm00001d048382	60S ribosomal protein L21-1	GO:0006412, GO:0003735, GO:0005840, GO:0022625, GO:1990904	Embryo_16DAP(253.7)
558	MQTL9_9	9	155286842	155288530	Zm00001d048383	Protein_coding	GO:0005634, GO:0006355, GO:0003700, GO:0043565, GO:0003677	BraceRoot_Node6_abvgrnd_V13(19.6)
559	MQTL9_9	9	155293350	155294431	Zm00001d048384	Protein_coding	GO:0005576, GO:0019953, GO:0016020, GO:0071555, GO:0009653	Anthers_R1(680.3)
560	MQTL9_9	9	155329232	155336959	Zm00001d048385	Protein_coding	GO:0046872, GO:0005634, GO:0006325, GO:0035064	Whole_seed_2DAP(15.6)
561	MQTL9_9	9	155337463	155338397	Zm00001d048386	Protein_coding	NA	Whole_seed_10DAP(0.1)
562	MQTL9_9	9	155347374	155348984	Zm00001d048387	Xyloglucan galactosyltransferase MUR3	NA	TapRoot_Z1_7d(0.4)
563	MQTL9_9	9	155394466	155396205	Zm00001d048389	Xyloglucan galactosyltransferase MUR3	GO:0005768, GO:0005802, GO:0016757, GO:0009969, GO:0006486, GO:0030173, GO:0010256, GO:0009826, GO:0042353, GO:0009863, GO:0016020, GO:0016740, GO:0005794	Whole_seed_10DAP(15.1)
564	MQTL9_9	9	155400160	155403724	Zm00001d048390	Putative leucine-rich repeat receptor-like protein kinase family protein	GO:0005515, GO:0016021, GO:0005524, GO:0004672, GO:0006468, GO:0016020, GO:0016740, GO:0000166, GO:0016301, GO:0016310	WholeRootSystem_3d(5.4)
565	MQTL9_9	9	155410694	155411701	Zm00001d048391	Protein_coding	GO:0008270, GO:0005634, GO:0006355, GO:0043565, GO:0030154	Endosperm_16DAP(2.6)
566	MQTL9_9	9	155445018	155459975	Zm00001d048392	DENN (AEX-3) domain-containing protein	NA	Anthers_R1(10.2)
567	MQTL10_1	10	5099284	5100559	Zm00001d023420	Protein TERMINAL FLOWER 1	NA	Embryo_16DAP(8.3)
568	MQTL10_2	10	12201891	12203553	Zm00001d023615	WRKY-transcription factor 15	GO:0006355, GO:0003700, GO:0043565, GO:0005634, GO:0003677, GO:0050896	Embryo_16DAP(16.6)
569	MQTL10_2	10	12212219	12213881	Zm00001d023616	Probable WRKY transcription factor 30	GO:0006355, GO:0003700, GO:0043565, GO:0005634, GO:0003677, GO:0050896	Embryo_16DAP(16.6)
570	MQTL10_8	10	142866476	142870798	Zm00001d026287	UDP-N-acetylglucosamine diphosphorylase 2	GO:0006048, GO:0070569, GO:0003977, GO:0009226, GO:0016740	Embryo_16DAP(103.9)
571	MQTL10_8	10	142887361	142891016	Zm00001d026288	Protein_coding	GO:0005634, GO:0003677, GO:0043231	Leaf_30_DAP_NOPOL(29.8)
572	MQTL10_8	10	142956463	142961794	Zm00001d026289	Potassium transporter 10	GO:0016020, GO:0015079, GO:0071805, GO:0006811, GO:0006813, GO:0016021	Leaf_24_DAP_NOPOL(30.4)
573	MQTL10_8	10	142970716	142981629	Zm00001d026290	NAD(P)-binding Rossmann-fold superfamily protein	GO:0055114, GO:0016491, GO:0016628, GO:0006631, GO:0005777, GO:0009062, GO:0008670	Leaf_18_DAP_NOPOL(43.7)
574	MQTL10_8	10	142982967	142990366	Zm00001d026291	Protein_coding	NA	Tassel_V13_Immature(100.7)
575	MQTL10_8	10	143077541	143089471	Zm00001d026293	Gamma-aminobutyrate transaminase POP2 mitochondrial	GO:0003824, GO:0030170, GO:0008483, GO:0009102, GO:0004015, GO:0009448, GO:0003867, GO:0016740	Leaf_30_DAP_NOPOL(22)
576	MQTL10_8	10	143095590	143097811	Zm00001d026294	Protein_coding	NA	0
577	MQTL10_8	10	143128213	143138549	Zm00001d026295	Protein_coding	NA	Cob_V18_Immature(8)
578	MQTL10_8	10	143156312	143161817	Zm00001d026296	Trypsin family protein	NA	Cob_R1_Pre_pollination(24.8)
579	MQTL10_8	10	143162797	143163018	ENSRNA049474917	snoRNA	NA	NA
580	MQTL10_8	10	143164305	143165139	Zm00001d026297	Proline-rich family protein	GO:0005886	Embryo_18DAP(6)
581	MQTL10_8	10	143168656	143170119	Zm00001d026298	Putative heavy metal transport/detoxification superfamily protein	GO:0046872, GO:0030001	Stem_V3(1)
582	MQTL10_8	10	143189248	143189338	ENSRNA049474778	snoRNA	NA	NA
583	MQTL10_8	10	143197942	143203163	Zm00001d026300	Protein_coding	GO:0005515, GO:0003676, GO:0005737, GO:0031047, GO:0090502, GO:0004521, GO:0035194	Tassel_V13_Immature(6.4)
Note: The genes marked in red are the genes (maize-rice homologous genes and the MQTL < 1 Mb, the genetic distance < 4 cM, and the initial QTLs number > 2).
