# Supplementary material for: Meta-Quantitative Trait Loci Analysis and Candidate Gene Mining for Drought Tolerance-Associated Traits in Maize (Zea mays L.)
Source: Int J Mol Sci. 2024 Apr 12;25(8):4295. doi: 10.3390/ijms25084295 (PMC11049847; doi:10.3390/ijms25084295)
Supplement: Supplementary file 1 [file ijms-25-04295-s001.zip › Table S9.xlsx]

## Sheet: Sheet1
Table S9. Candidate genes' expression patterns in the 46 specific tissues
No.	Gene ID	Embryo_16DAP	Embryo_18DAP	Embryo_20DAP	Embryo_22DAP	Embryo_24DAP	Endosperm_16DAP	Endosperm_18DAP	Endosperm_20DAP	Endosperm_22DAP	Endosperm_24DAP	Leaf_0_DAP_NOPOL	Leaf_12_DAP_NOPOL	Leaf_18_DAP_NOPOL	Leaf_24_DAP_NOPOL	Leaf_30_DAP_NOPOL	Leaf_0_DAP_POL	Leaf_12_DAP_POL	Leaf_18_DAP_POL	Leaf_24_DAP_POL	Leaf_30_DAP_POL	Whole_seed_2DAP	Whole_seed_6DAP	Whole_seed_10DAP	Whole_seed_14DAP	Whole_seed_18DAP	Whole_Seed_22DAP	Whole_Seed_24DAP	Stem_V1	Stem_V3	cob_R1_Pre_pollination	cob_V18_Immature	tassel_V13_Immature	tassel_V18_Meiotic	Anthers_R1	Silks_R1	WholePrimaryRoot_7d	WholeRootSystem_3d	WholeRootSystem_7d	TapRoot_Z1_7d	TapRoot_Z2_7d	TapRoot_Z3_7d	TapRoot_Z4_7d	BraceRoot_Node6_abvgrnd_V13	CrownRoot_Node4_V7	CrownRoot_Node5_V13	CrownRoot_Node5_V7
1	Zm00001d027649	0	0.1	0.1	0	0.1	0.4	0.7	2.6	2	3.9	0.4	0.2	0.4	15.4	181.5	0.1	0.2	0.2	0.6	4.4	0.1	0.3	1.4	0.7	1	1.9	3.1	1.7	0.6	0.1	0.3	0.3	90.8	1.5	0	16.6	1.9	14.2	0.2	6.3	5.9	4.8	1.6	8.7	17.3	8.5
2	Zm00001d028974	8.8	5.6	8.3	9.2	17.8	12.5	7	5.4	5.4	7.3	32.1	36.7	49.8	73.1	80.5	39.4	43.5	43.8	64.7	82.6	13.8	8.2	13.9	10.2	9.7	8.9	13.2	29.9	31.2	18	9.9	16.1	21.3	31	36.9	42.4	26.7	38.6	29.6	31.5	39.8	44.3	30.6	40.7	43.9	28.7
3	Zm00001d028999	0.2	0.1	0.1	0.1	0.1	0.4	0.1	0.1	0.1	0.2	2.2	9.7	20.9	26.8	55.9	3.1	9.1	11.2	26.3	32.3	0	0.2	0.7	0.4	0.4	0.3	0.5	0.3	0.2	0	0	0	0	1	0.1	0.7	0	0.3	0.3	0.3	0.5	11.2	0.4	1.1	0.2	0.1
4	Zm00001d029740	9.4	11.4	9.9	8.6	8.7	19.6	18.1	13.9	11.5	10.9	26.8	27.4	29.9	33.1	27.8	21.4	25.7	28.5	32.6	32.8	12.2	16	14.9	24.4	16.4	12.9	11.4	13.5	14.2	10.5	12.3	17	20.7	16.5	20.5	39.2	26.4	33.1	18.1	23.4	27.5	25.6	15	34	25.4	24.6
5	Zm00001d023420	0	0.1	0.1	0.1	0	0	0	0	0	0	0	0	0.1	0.2	0.3	0	0	0.3	0	0.2	0.7	0.2	0.1	0.1	0.1	0	0.1	5.4	8.3	3.1	0.8	2.7	0.7	0.1	0.1	1	1.6	0.8	5.8	1.6	6.5	2.4	0.8	2.9	0.8	6.3
6	Zm00001d023615	0.8	0.5	0.1	0.1	0.1	0.1	0.1	0	0	0	2.1	2.3	1.8	2.7	1.5	1.7	1.7	0.9	3.3	2.8	16.6	5.5	1.6	0.3	0.3	0.2	0.1	1.3	3.3	1.2	1.6	3.3	0.4	0.1	0.4	2.5	0.7	2.5	0.7	1.3	1.8	1.7	0.1	0.9	0.7	0.3
7	Zm00001d023616	0.8	0.5	0.1	0.1	0.1	0.1	0.1	0	0	0	2.1	2.3	1.8	2.7	1.5	1.7	1.7	0.9	3.3	2.8	16.6	5.5	1.6	0.3	0.3	0.2	0.1	1.3	3.3	1.2	1.6	3.3	0.4	0.1	0.4	2.5	0.7	2.5	0.7	1.3	1.8	1.7	0.1	0.9	0.7	0.3
8	Zm00001d005270	3.1	3.4	3	3.5	3.3	4	3.1	5.1	5.6	4.1	7	5.8	8.1	5.4	5.1	6.9	6.6	8.1	5.6	8.6	4.9	4.3	4.6	2.9	3	4.2	4.2	4.7	3.9	4.2	5	4.5	5.6	4.5	5.1	5.7	1.8	5.5	4.4	4.1	5.7	6.2	4	7.5	6.7	5.3
9	Zm00001d006329	18.5	21.4	16.7	17.9	20.9	63.1	43.5	30.9	28.1	30.1	14.8	27.5	32	82.8	201.4	18.2	21.9	23.7	42.4	29.2	30.1	40.7	45.2	67.4	44.1	25.5	28.1	26.6	30.6	24.7	14.8	19.3	24	79	42.9	31.3	19.3	31.8	39.5	33.2	33.9	64.2	42.2	32.9	22.2	30.9
10	Zm00001d006371	0.5	0.6	1.2	1.9	1.9	0.4	0.8	0.2	0.2	0.1	24.3	10.7	13.7	18.2	15.7	22.6	12.1	15.2	13.2	18.8	5.1	9.9	25.7	6.1	3.3	2.2	2.2	8.5	7.7	2.9	1.3	1	40.3	13.2	35.3	18	19.9	16.3	11.8	15.8	18.5	15.6	12.3	19	26.2	22.7
11	Zm00001d039631	8.6	8.3	10.6	9.2	9.9	5.1	22.3	1.7	1.7	1.3	0.8	0.9	1	0.6	1.7	1.2	0.8	0.8	0.5	0.7	52	60.3	49.9	34.6	22.4	18.8	16.3	23.7	16.1	46	16	38.1	72	24.9	112.6	0.3	0.2	0.4	0.5	0.3	0.5	0.3	0.1	0.1	0.1	0.2
12	Zm00001d040191	16	26.5	33.1	34.2	36.2	15.3	23	17.5	15.1	20	39.3	36.1	31.5	32.5	40.3	35.7	30.6	31.1	30.1	25.8	35.3	44.6	37.4	33.9	23.8	17.2	21.9	24.5	20.7	29.8	31.8	30.2	48	26.6	34	27.5	25.6	27.6	21.5	25.9	28.1	25	26.6	27.7	31.4	32.9
13	Zm00001d040589	0.2	0	0.1	0.1	0.1	0	0	0	0	0	2	1.2	0.6	0.5	0	3	1.2	0.8	1.3	0.6	1.2	1.3	1	0	0	0	0	0.9	3.6	0.5	0.1	0.1	1.6	0.3	0.1	0.8	0.2	0.7	5.6	0.8	5.4	0.5	1.1	10.9	0.7	0.6
14	Zm00001d041458	0.6	0.1	0	0.2	0.2	0	0	0	0	0	0	0	0	0	0	0	0	0	0	0	0	0	0	0	0.1	0	0	0.1	0.2	0	0	0	0	0	0	1.8	10.5	13.3	2.7	10.1	0.7	1.2	0	0.2	0.6	0.2
15	Zm00001d042541	0.2	0	0.1	0.1	0.2	0.2	0.1	0	0	0.1	2.7	1.5	2.6	3.5	1.7	1.5	1.5	2.6	2.4	3	9.1	3.6	8.2	2.3	1	1.1	1.1	29.6	28	5.2	1	7.7	10.1	5.4	1.8	135.8	638.1	245.4	95.9	390.6	73.8	113.4	225.4	47.9	97.4	135.8
16	Zm00001d051932	41.7	13.4	9.6	8.1	7.4	0.1	0	0.1	0.1	0	0	0	0	0	0	0	0	0	0	0	4.7	0.8	0.3	0.2	0.5	0.6	0.7	8.4	7.2	5.7	8.3	15.1	0.4	0.1	4.4	0	0	0	0	0	0.8	0	0	0	0	0
17	Zm00001d052416	14.5	18	22	19	21.1	16	21	31	20.4	12.4	49.8	138.9	140.6	128.2	106.6	53.1	131	131.6	172.2	130	58.2	42.9	31.8	32.4	28	24.6	17.5	36.5	32.1	71.7	32.6	25.7	49.2	57.3	66.8	39.3	38.5	44.2	37.4	39.3	58.8	41	31.2	34.7	42.1	35.7
18	Zm00001d013201	5.2	7.4	7.7	8.4	8.4	5.7	6.7	6.2	6.7	5.6	4.9	7.5	9.8	12	16.3	5.9	6.4	6.8	10	10.5	11.1	12.2	11.3	10.4	7.6	7.5	7.4	10.5	11.4	11	16.5	15.3	11.5	52	8.1	15.6	15.1	14	11.1	14.9	10.6	12.1	17.3	17.5	17.9	14.1
19	Zm00001d013208	0.4	1.6	0	0	0	0.6	0.4	0.1	0	0	2.5	2.6	6.1	3.6	2.3	5	1.5	2.1	8.6	9.3	0	0.1	0.1	0	0.2	0.1	0.1	0.7	0.9	0.1	0	0	0.4	0.3	0.1	2.7	1.7	4.1	1.4	3.1	1.6	1.2	0.1	0.7	1	0.3
20	Zm00001d013256	6.8	9.3	6.5	6.6	6.2	10	12.2	9.6	9.5	7.4	6.8	6.3	5.6	9.5	2.2	7.8	5.1	4.3	6	4.3	30.1	38.4	44.4	28.5	20.2	14.7	12.6	22.2	25.1	27.8	11.1	15.1	70.2	17.5	46.6	24.8	33.4	24.8	26.3	30.5	20.6	18.2	35.1	26.8	36.9	32.3
21	Zm00001d014025	0	0.1	0.1	0.1	0.1	0.7	1.3	2.8	2.1	2.9	2.1	2.5	2.1	2.3	10.4	2.1	2.2	2.6	2.8	3.5	0.4	0.3	0.6	0.2	1.1	1.2	1.7	0.8	1.5	0.3	0	0.1	2.1	1.4	0.2	19.7	6.9	18.3	3.8	8.2	7.3	9.4	1.4	10.6	11.4	4.7
22	Zm00001d016105	8.3	3.1	1.5	1.9	1.7	13.7	5	3.5	3	3.1	48.3	36.9	48.4	27	9.9	48.4	53.4	55.7	46.5	42.5	8	7.5	5.9	5.5	4.9	4.8	3.7	8.9	10.7	9.3	6	5.5	6.6	16.2	22.5	33.8	16.7	31.6	17.2	20.8	26	21	11.6	29.6	26.1	22.3
23	Zm00001d036356	19.7	17.4	17.3	14.9	12.9	15.2	10.9	8.7	6.8	5.1	5.4	4.2	5.9	4	0.6	4.5	5	5.8	5.1	4.7	15.6	11.9	10.7	12.5	9.5	7.7	6.3	15.2	14	14.9	16.8	13.6	4.4	5.9	6.8	5.5	5.2	4.6	9.1	8	4.4	7.6	12.3	7.2	6.9	6.1
24	Zm00001d036364	0	0	0	0	0	0	0	0	0	0	8	18.7	10	4.4	0.5	8.1	22	11.8	19.8	13.4	0.1	0	0	0	0	0	0	0.3	0.8	0.1	0	0	0.1	0.1	0.1	0.5	0	0.1	3.1	0.2	4.2	5.3	0.5	0.9	1	0.3
25	Zm00001d038190	15.2	20.2	24.1	24.5	25.7	33.3	46	40.2	39.9	38	34.8	28.6	35.4	34.5	35	33.2	28.4	36.5	31.3	39.4	27.6	35.6	30.2	26.6	43	33.3	32.1	25	23.6	25.5	29.4	35.7	40.3	50.9	20.4	41	21.6	31.6	29.8	30.6	42.7	37.7	36.1	39.9	39.9	31.5
26	Zm00001d038543	180.8	119.7	110.6	101.3	106.5	113.7	59.9	47.5	33.6	31.6	36.8	46.6	55.5	74.8	78.7	36.4	46.3	46.4	61	52.6	123.6	115.6	94.8	90.7	67.6	50.4	43.5	97.9	132.4	122.1	115.4	102.1	56.5	35.6	72.2	93.2	106	100.8	120.7	94.5	59.7	101.3	82.7	92	90.5	96.6
27	Zm00001d038709	73.3	76.4	79	77.2	69.3	184.2	151.5	158.3	138.5	138.1	73.2	84.5	99.4	125.7	255.4	68.9	84.4	90.2	116.5	110.2	101.7	137.7	159.2	178.4	146.9	123.2	123.1	99	100.2	93.2	62.1	83.7	148	92.2	165.5	177.9	158	186.1	134.1	162.4	118.5	152.4	132.9	140.1	151.9	178.7
28	Zm00001d018734	0.1	0	0	0	0	0	0	0	0	0	49.8	12.2	52.1	57.8	289.7	53.8	15	42.4	40.5	70	0	0	0.1	0	0.1	0	0	0.3	0.5	0	0	0	0	1	0	0.2	0	0	3.5	0	8.6	31.4	0.2	0.5	0.2	0
29	Zm00001d018738	0	0	0	0	0	0	0	0	0	0	20.6	8	53	66.5	425.3	23.9	8.8	30.9	71.1	115.5	0	0	0	0.2	0	0	0	2.5	3.2	0	0	0	0	0.4	0	3.5	0.1	2.2	2.7	1.8	4.6	194.8	0.2	6.1	2.6	0.9
30	Zm00001d020025	2.7	2	5.1	5.3	10.1	0.2	0.2	0.1	0.2	0.2	60.6	31.8	33.9	18.1	11.8	61.4	38	35	22.8	21.8	5.8	15.5	34.5	3.6	1.3	1.2	2.3	4.5	9.2	4.6	0.5	1.4	24	37.4	54.4	8.4	14.5	5.1	17.1	10.2	22	21.6	18.4	23.5	28.4	16.2
31	Zm00001d020267	76.3	22.6	9.4	14	15.1	12.8	3.6	1.7	1.9	2.3	2.2	2.1	5.7	6.1	9.8	5.3	1.7	3.4	5	9.1	20.4	10.2	9.2	2.9	5.9	4.6	3.7	14.4	8.2	14	13.5	22.2	10.7	7.7	7.3	5.9	5.8	7.2	7.3	6.3	4.8	3.7	3	3.9	9.8	3.1
32	Zm00001d020861	6.8	2.4	3.2	5.1	6.6	0.5	0.6	0.2	0.3	0.4	6.4	6.2	9.8	3.6	3.7	9.6	11.4	9.6	11.8	6.5	9.7	7.7	8.9	2.6	2	1.6	1.6	4.1	4.2	10.6	5.5	3.3	10.9	5.9	5.3	7.8	7.3	6.8	4.3	6.2	7.9	4.7	5.3	7.2	16.8	6.9
33	Zm00001d009735	1.8	2.8	3.7	4.4	5.3	2	1.7	2.7	2.7	2.5	0.5	1	1.4	1.1	0.2	0.6	0.8	1.1	1	1	6.6	4	3.5	2.7	2.5	2.5	2.6	2.1	3.4	6	5.4	4	2.3	1.6	2.9	1.3	0.9	1.6	2.8	1.8	1.7	1.8	1.9	1.7	2.2	1.8
34	Zm00001d009747	7	4	2.8	2.8	3.3	1.5	0.9	0.5	0.6	0.4	1.1	0.9	0.9	1.9	1.3	1.2	0.7	1	1	0.8	4.7	3	3.6	1.8	1.6	1.1	1.2	3.1	3.6	4.8	1.9	1.6	3.1	1	1	2.9	4.4	2.9	3.2	3.6	2.2	2.1	3	2.4	3.7	2.8
35	Zm00001d009797	1.6	0.1	0.6	0.3	0.6	44.6	7	12.9	16.6	21.8	0.5	0.1	0.1	1.5	8.6	0.6	0	0.2	0.2	2.3	1.8	2.2	8	4.7	7.1	12.5	16.2	2.1	0.8	0.9	6.5	6.9	1.8	0.5	1.6	4	0.8	5.1	1.3	3.4	2.4	2.1	1.5	4.6	4	2.9
36	Zm00001d010380	5.7	1.9	1.4	3	12.9	0.1	0	0	0	0	0.8	0.8	5.9	1.7	1.1	1.8	1.5	2.3	2.3	2.1	4.2	3.7	3.3	1.3	1.2	0.7	1.2	0.8	2.5	2.6	1.2	1.1	1.2	0.3	2.3	1.8	0.6	1.4	1.2	8	2.1	2.5	20.7	1.1	4.2	0.9
37	Zm00001d010579	20.1	15.5	14.1	12.9	12.2	0.4	0.5	0.3	0.4	0.2	1.2	1.3	2.4	7	23.8	0.9	1.3	2	1.9	4.5	17.1	8	4.5	1.6	1.2	1.8	1.6	23.5	23.9	23	25.6	22.5	6.8	1	6	11.1	11.8	10.6	11.4	10	6.7	10.8	8.3	11.8	13.1	14.3
38	Zm00001d010638	5.9	7.9	7.8	7	8.8	5.9	5.1	3.9	4	3.6	2.5	2.6	3.6	4.2	2.5	3.1	3.4	3.5	3.8	3.3	6.5	5.1	6.5	7.7	5.1	4.9	4.4	3.2	5	7.3	4.3	3.8	4.3	3.3	5.6	3.2	2.5	3	4	3.6	3.6	5.2	5.8	4.8	5.4	3
39	Zm00001d045044	45.5	38.4	41.6	43.9	56.7	43.2	31.8	30.8	29.8	30.3	11.9	9.6	14.5	14.6	4.1	14.3	11.5	12.1	18.6	13.4	80.8	85	88.6	45.2	39.7	32.1	35.1	25.9	35.4	74.8	27	29	45.2	21.1	86.9	30.4	18.1	24.2	52.9	41.2	50.1	51.7	82.1	37	49.2	31.6
40	Zm00001d047559	16.9	17.1	11.4	10.8	8.6	0.1	0.1	0.1	0.1	0.1	0	0	0	0	0	0	0	0	0	0	0	0	0	0	0.5	1	0.9	0.1	0	0.1	0	0.1	0	0	0	0.1	0.2	0.1	0.1	0.1	0	0.2	0	0.5	0.1	0.2
41	Zm00001d047563	1	1	2	3.3	3.7	3	3.2	2.9	4	4.8	31.5	28.8	37	40.8	36.1	37.9	32.5	33	45.5	37.4	14.8	24.6	24.4	5.7	6.3	7.6	7.3	14.5	16	14.4	6.3	11.4	39.5	18.7	24.6	27.4	20.8	24.6	21.4	22.2	31.9	29.7	21.4	29.4	36.4	28
42	Zm00001d047567	41.5	19.4	25	42.8	93.9	0.2	0.2	0.1	0.1	0.4	0	0	0	0	0.3	0	0	0	0	0	0	0	0	0.4	0.4	4	6.8	0	0	0	0	0	0	0	0	0.1	0.1	0	0	1.1	0	0.1	2.9	0.1	0	0
43	Zm00001d053808	23.4	21	21.5	19.1	11	4.6	4.6	2.7	2.7	2.8	0.1	0.1	0.3	0.2	0.3	0.1	0.2	0.2	0.3	0.2	9.1	5.5	8.6	11.1	5	4.7	4.7	11.7	11	9.6	12.8	11.4	1.6	1.4	1.3	3.9	5.6	4.8	5.4	4.8	1.3	6.1	4.8	3.2	3.2	4.7
44	Zm00001d053812	1.3	0.7	0.9	1	1.6	1.6	1	1.3	1.8	1.7	6.4	5.8	5.8	2.4	1	2.3	5.6	6.2	6.7	3.7	1.8	1.6	0.7	1.2	1.4	1.6	1.4	0	2.7	3.1	3.9	6.7	4.1	1.5	1.3	0	0	0	0.7	0	1.8	0.6	0	0	0	0
45	Zm00001d053813	25.3	37.5	46.7	44.7	38.1	35.2	45.5	35.3	31.9	31.8	20.5	23.9	24.9	22.1	14.4	18.8	23.7	22.9	21	21.2	39.3	31.5	39	53.4	43.6	35	33	43.5	33.6	43	52	47.2	23.5	14.2	27.4	24.6	29.1	25.1	37.4	28.4	24.2	28.1	34.7	27.3	25	26.6
46	Zm00001d053816	5	7	7.3	8.6	8.1	2.3	4.6	4.7	5.4	3.8	19.1	8.2	6.7	10	10.9	16.1	8	7.3	11.3	7	8.6	12.4	9.6	5.1	5.7	6.9	5.6	6.3	7.7	7.5	13.5	12.8	18.7	7.8	6.4	13.5	8	14.2	9.6	9.4	14.1	9.9	4.5	14.8	11.8	9.9
47	Zm00001d053818	1.9	4.4	1.7	1.8	1.8	0.7	1.1	0.7	0.5	0.5	1.9	10.6	4.3	9.7	34.3	2.8	7.9	4.1	9.2	7.8	2.3	2.6	2.6	1.9	1.5	0.7	1.2	2.5	2.9	2.1	2.7	3.3	1.6	1.7	4.2	4.2	3.9	6.3	4	4.8	2.7	8.7	3.2	3.3	2.3	3.4
48	Zm00001d053819	6.3	6.3	7.5	7.4	7.4	1	0.9	0.6	0.6	0.8	2.7	0.9	1.1	2.2	1.2	2.3	1.2	1.3	1.6	2	13.6	9	5.7	2.7	1.7	1.5	1.5	12.6	10.6	20.4	21	16.9	3.7	7.1	12.2	7.9	3.2	7.7	5.6	9	7.7	7.6	14.7	7.7	5.6	6.2
49	Zm00001d018004	27.5	35.8	29	29.2	30.3	30.1	26.9	23.1	22.3	19.2	25.9	30.1	36	33.3	22.3	31.1	29.5	30.8	33	29.5	77.6	68.6	46.5	34.2	30	24.8	22.9	38.3	43.5	69.1	31.5	39.4	37.8	38.3	48	44.9	39.1	39.6	41.8	45.7	32.4	46.4	66	47.4	48.7	56.6
50	Zm00001d018005	15.1	13.6	14	11	10.2	24.1	18.6	13.3	12.7	11.3	10.2	9.8	9.3	11	9.9	9.6	10.3	9.4	8.2	8.7	12.9	13.7	16.5	27.9	17.5	13.5	11	21.1	18.7	14.2	13.9	17.7	13.2	9	13.5	12.5	16.1	10.8	15	12.3	9.7	13	13.2	14.9	12.2	11.3
51	Zm00001d018009	6.5	12.6	15.5	15.8	6.5	0.9	1.9	1.2	1.5	1.2	0.8	1	0.9	1.1	1	1.1	0.9	1	0.9	0.9	8.7	6.9	4.5	2.5	2.3	3.5	2.2	14.2	11.6	10.1	25.4	19.9	2.4	24.4	0.8	3.5	3.4	3.9	5.3	3	1.6	5.1	1.7	3.7	2.5	3.1
52	Zm00001d018010	2.4	5.6	1.9	1.9	2	10.7	9.1	15.8	21.3	34.5	3.1	3.7	2.6	8.1	23	3.2	2.1	1.6	6.7	6.5	2.8	5.1	11.5	6.4	7.8	10.8	15.7	5.8	4.5	1.6	0.5	1.7	8.5	6.3	20.1	19.8	8.9	19.7	13	13.6	12	23.1	8.2	13.5	12.1	12.4
53	Zm00001d018011	0.6	0.8	0.8	0.8	1.1	0.4	0.4	0.5	0.8	0.8	1.3	2.1	3	7.9	24.7	1.4	2.3	1.9	4.4	6.6	1.1	1.3	1.7	0.9	0.7	0.9	0.9	0.8	1.1	0.9	0.8	0.8	2	1.1	1	2.5	0.6	1.8	0.8	1.1	1.6	2.1	1.1	1.7	1.7	1.4
54	Zm00001d018013	4.9	10	13.2	17	15.8	1.9	5.4	4.8	5.3	3.5	10.1	6.8	8	11.3	9.5	7.4	4.8	8.5	8.8	7.6	18.4	34.2	22	9.9	7.4	8.7	6.4	7.7	10.1	13	25.4	23	23.5	11.2	7.5	10	5.4	8.7	13.3	7.3	13.8	10.5	8.6	10.9	8.2	9.3
55	Zm00001d018014	9.7	15.6	18.2	16.3	7	1	1.8	0.8	0.9	0.6	0.5	0.5	0.4	0.7	0.5	0.2	0.4	0.4	0.4	0.6	11	5.9	3.7	2.9	2.2	2.5	1.7	11.9	9.6	12.6	27.5	19.5	1.1	12.2	0.6	2.4	4	2.7	3.7	2.3	1	4.1	1.1	1.8	1.8	3.1
56	Zm00001d018017	6	0.9	0.2	0.1	0.3	4.8	0.5	0	0.1	0.1	0	0	0	0.4	1.2	0	0	0	0.4	0	0.4	0.1	0.1	0.1	0.4	0.1	0	0.1	0	0	0.1	0.2	0	0	0	0.9	0.2	0.8	0	0.5	0.2	0.3	0.2	0	0.9	0
57	Zm00001d018024	4.6	2.5	2.7	2.8	3.9	0.2	0.1	0	0	0	7.7	2.6	5.7	1.9	0.4	5.8	5.7	5.4	3.1	3.8	5.8	6.3	3.8	0.6	0.4	0.4	0.5	10	8.9	7.3	2.3	5.3	10.1	3	48.4	9.7	19.5	12.2	13.6	13.9	5.3	4.8	10.1	4.6	6.4	10.6
58	Zm00001d018025	1.6	2.3	2.7	2.9	2.5	4.4	3.8	3.3	3.8	3.7	7	6.7	6.1	4.7	1.6	8	7.4	7.5	5.1	7.7	6.6	7.2	6.2	4.2	4.4	4.4	3.9	6.9	4.9	7.7	8.1	6.9	7.9	4	8.3	8.5	8.3	7	7	5.6	6.5	7.7	4.5	8.6	6.1	7.6
59	Zm00001d018028	0.6	0.4	0.9	0.9	2.2	0.7	0.6	0.8	1.2	1.2	1.2	0.7	2.5	5.9	8.8	0.9	1.4	1.1	2.1	2.7	1.6	4.7	7.3	2.5	1.9	1.8	1.5	3.4	5.8	1.6	4.3	1.3	21.1	4.1	0.5	16.4	15.7	16.2	3.5	12.5	11.8	10.5	4.9	22.7	33.9	24.3
60	Zm00001d018029	0.1	0	0	0	0	6.1	1.4	3.4	2.3	1.1	0	0	0	0	0	0	0	0	0	0	0	0	0	0.1	0.9	1.5	0.8	0.1	0	0	0	0	0.1	0.1	0	10.5	10.1	10.9	1.7	7.1	3.9	4.4	0.1	3.2	3.7	2.8
61	Zm00001d018030	0.1	0	0	0	0.1	0.3	0	0	0	0	475.4	405.4	482.8	252.5	102	519.8	493.8	428.4	591.9	505.3	7.2	5.9	10.5	3.8	1	0.2	0.1	6.4	3.1	7.8	0.9	1	27.9	102.8	48.5	0	0.1	0	17.9	13.1	216.8	14.1	39.8	0.6	7.8	1.3
62	Zm00001d018031	96.3	37	49.3	51.9	59.5	1.4	2	0.7	0.3	0.5	0	0	0	0	0	0.1	0	0	0.1	0	69.3	47	31.6	9.4	4.6	5.2	6.3	12.1	12.3	24	47.4	15.8	4.8	0.7	4.4	2.5	1.5	1.8	0.7	2.5	0.9	3.8	2.2	1.9	1.3	2.9
63	Zm00001d018731	4.9	1.3	1.2	0.9	1	0	0	0	0	0	0	0	0	0	0	0	0	0	0	0	0.3	0.1	0	0	0	0	0.1	3.7	3.8	0.5	1.8	1.2	0.1	0.2	0.1	0	0	0	0	0	0	0	0	0	0	0
64	Zm00001d018732	4.6	9.1	7.8	9	10.4	4.7	7.2	5.8	5.3	5.3	5.8	3.8	6.7	5.3	10.4	4.6	4	6	5.4	6.8	13.6	16.5	15.2	10.2	8.5	7.1	7	8.7	10	13.5	9.7	11.5	15.1	20.4	10.6	10.8	6.9	9.2	11.2	10.2	10.1	11	12.3	13.3	13.3	12.2
65	Zm00001d018733	3	3.7	5.7	6.9	7.9	2.3	2.5	3.3	4	2.9	6.6	5.4	4.7	5.4	3.4	6.1	3.7	3.4	4.7	3.9	6.3	11.7	6.6	3.8	3.3	4.2	4	4.6	5.9	5.5	9.9	8.1	8.8	3	5	5.6	3.6	5.8	7.1	4.8	7.1	5.4	4.3	6.4	5.5	5.6
66	Zm00001d018737	0	0	0	0	0	0	0	0	0	0	0	0	0	0	0	0	0	0	0	0	0	0	0	0	0	0	0	0.1	0	0	0	0	0	0	0	1.6	0	2.7	0	1.2	0.5	2.2	0	31.1	6.7	10.4
67	Zm00001d018740	0.5	0.8	0.7	0.6	0.6	0.1	0.5	0.5	0.2	0.3	43.7	69.2	51.6	24	5.2	42.8	69.3	62.4	43.6	31.8	1.2	0.8	0.6	0.8	0.8	0.4	0.3	1	0.4	1.6	1	0.5	0.9	7.5	3.4	0	0	0	0.5	0.1	4.3	0.2	0.2	0	0.1	0
68	Zm00001d018742	11.9	5.7	7.5	9.1	8.4	0	0	0.1	0	0.1	0.1	0.3	0.3	0.1	0.2	0.1	0.1	0.5	0.2	0.3	13.1	4.3	3.3	0.3	0.3	0.6	0.8	9.4	15.6	21.4	60.9	26.2	4.3	1.2	0.1	10.1	9.6	6	21	25.9	27.9	10.6	63.1	8.2	67.5	14.3
69	Zm00001d018744	2.8	1.5	1.2	2.2	3.7	0	0	0	0	0.3	0	0	0	0	0	0	0	0	0	0	2	0	0	0	0	0	0	302.2	61.2	0.4	0	1.1	0	0.4	0	959.5	1448.9	1227.4	1.5	1048	418.9	89.3	0.8	72.7	191.6	49.7
70	Zm00001d009591	30.6	21.3	22.9	21.6	19	11.6	13.3	6.5	6.1	6.4	7.1	4.7	5.3	5.6	4.2	7.1	5	7.1	4.4	5.2	15.3	12.5	15.2	15.2	11.5	9.2	8.8	19.6	14.4	13.9	22.5	17.8	12.6	4.9	11.6	8.4	7.8	8.2	10.9	11	6.8	10.6	16.3	10.3	9.1	9.6
71	Zm00001d009592	0.6	0.9	1.2	1.2	0.7	0.7	1.4	0.7	0.8	0.6	0.6	0.4	0.4	0.4	0.4	0.4	0.8	0.4	0.2	0.6	1.1	0.8	1.5	2.2	1.1	0.9	0.9	1.6	0.3	1.3	1.1	1.3	0.7	0.3	0.8	0.1	0.1	0	0.2	0.1	0.1	0.2	0.2	0.2	0.2	0.2
72	Zm00001d009594	29.8	19.8	41.1	56	126.3	77.7	49.9	50.5	39.7	41	6.3	11.1	18	47.7	344.4	7.5	10.7	15.4	17.2	37.9	32.3	62.6	82.7	71.6	57.6	58	68.4	36.1	56.1	25	36.7	35.2	184.5	63.4	64.2	136.2	47.1	140.9	38.9	102.5	73.3	105.5	112.6	105.2	137.5	104.4
73	Zm00001d009596	2.9	2.7	3.4	3.4	3.7	3.4	2.7	2.5	2.1	1.8	9.4	13.1	10.2	4.4	0.7	9.3	13.7	10.9	11.8	8.1	3	2.9	1.5	2.3	2.7	2.4	2.1	3.3	2.4	2.8	2.3	2.6	4.4	2.1	2	0.6	0.3	0.7	1.4	1.2	7.2	1.4	2	1.1	1.2	0.8
74	Zm00001d009597	10.6	12.6	12.4	10.6	9.8	6.2	7.3	4.3	4.4	3.5	3.5	3.1	2.4	2.9	1	3.5	2.3	2.7	2.1	2.1	8.1	8.1	8.3	10.4	7.5	5.5	5	15.1	12.6	10	15.2	13.1	4.9	2.4	5.4	5	5.4	4.3	7.9	5.4	3.8	6.2	7.6	7.2	5.7	5
75	Zm00001d009599	4.7	7.9	3.3	2.3	2.4	0	0	0	0	0	6	3.3	0.1	0	0	4.4	2.1	1.2	1.1	0.4	0.4	0.4	0	0.2	0.2	0.3	0.2	3.8	14.2	0	0.1	0	0.1	0	0	0.2	0	0.1	5.6	0	6	0.1	0.1	0.9	0.5	0
76	Zm00001d010724	10.7	7.7	8.8	9.9	10	7.4	8.5	7.2	5.9	5.5	5.1	3.8	4.5	10.3	24.5	5	2.9	3.7	6.3	7.4	10.5	15.3	14.5	9.9	10.3	8.5	7.7	5.4	6.5	10.1	12.5	7.9	7.7	4.9	3.5	6.8	1.8	5.9	5.5	4.7	7.7	7.8	4.2	7.7	9.1	6.5
77	Zm00001d010725	0.9	1.9	2.8	3.8	4	0.3	1.4	0.6	0.7	0.4	1.8	1.9	1.2	9	9.5	1.8	1.1	0.9	1.4	1.5	6.4	18.9	8.3	4.2	2.4	2.2	1.6	4.2	3.3	3.2	8.3	9.8	5.2	0.6	0.9	2	1.6	1.9	3.1	1.9	2.9	2.3	2.3	1.6	2.4	2.6
78	Zm00001d010727	7.4	4.5	5.4	5.3	4.5	7.1	6.2	4.5	4.5	3.8	0.8	0.9	0.7	1.3	0.1	0.6	0.7	0.6	1	0.7	4.2	4.8	3.3	4.8	4.8	4.2	4	7	5.5	4.5	8.5	9	2.2	0.7	1.7	2.6	3.3	2.9	3.6	2.8	2	2.1	3.2	2.7	2.6	2.9
79	Zm00001d010728	212.6	83.3	84.3	76.8	86.5	38.9	16.2	7.2	5.8	9	0.6	0.2	0.6	0.4	0.2	0.4	0.2	0	0.5	0.1	41.3	20.8	10.7	18.9	15.2	16.1	21.1	56.2	47	29.6	55.3	34.3	4.2	6.2	8.1	7.8	21.5	12.1	11.1	14.9	2.9	4.6	8.9	3.7	6.2	5.3
80	Zm00001d011066	8.8	6.3	6.3	6	5.5	11.2	6.6	7.9	6.5	7.7	4.8	5.7	8.4	10.3	22.7	5.3	5.5	8	8.2	12.1	11.6	13	18	11.6	8.3	6.5	8.2	7.4	10.7	12.3	6.3	5.5	16.9	4	7.6	20.6	8.8	18.9	9.1	13.7	14.2	17	11.1	24.4	18.7	12.4
81	Zm00001d011067	1.3	1.6	2.2	2.6	3.2	3.1	2.8	2.8	2.7	2.5	28.4	21.4	38.6	67.7	168.3	25.6	23.2	37.5	35.6	57.3	3.4	3.2	3.8	3.4	2.9	2.7	3	2.1	1.9	3.6	2.6	2.5	3.8	6.6	2	3.4	3.8	2.9	2.9	3.2	6.7	6.2	4.4	5.2	4.7	2.5
82	Zm00001d011068	2.3	2.9	2.2	3.3	2.8	2	2.3	2	1.8	1.3	2.9	2	3.4	7.9	13.1	4.2	2.2	2.9	4.4	5.3	4.4	4	3.7	2.4	2.4	2.7	1.7	2.3	2.4	3.5	4.6	4	2.7	1.2	2.1	3.4	1.5	2.4	2.3	1.9	2.3	2.3	1.7	2.8	2.5	2.2
83	Zm00001d011069	8.3	9.4	10	11	7.4	3.9	3.6	2.2	1.8	1.2	32.8	41.5	33.1	23.2	13.2	31.3	44.2	31.7	39.3	28.2	8.6	5.8	3.8	4.4	3.6	2.6	1.6	13.7	6.1	10.6	4	6.9	15.3	13	16.5	1.3	0.5	0.9	3.1	3.7	28.9	3.5	8.9	1.5	2.8	1.6
84	Zm00001d011073	0.2	0	0	0	0	0.2	0	0	0	0	27.2	19.8	19.1	3.5	0.5	36.2	27.6	40.8	18.9	14.4	3.1	2.5	1	0.3	0.1	0	0	1.5	1.2	3.6	0.3	0.6	13.6	14.6	2.4	2.1	5.8	2.4	3.3	3.5	52.8	1.1	2.8	1.2	5.6	2
85	Zm00001d011075	5.6	10.8	14.4	16.8	15.3	3.9	4.8	5.9	6	4	4.7	2.5	3.2	3.3	1.4	4.9	2.5	2.8	2.2	2.7	16.6	22.7	12.7	7.1	6.7	7.5	6	13	19.1	15.5	33.3	24.9	19.1	5.8	8	8.1	14.6	8.7	14.3	9.7	10.1	11.2	8.7	10.8	12.5	17.6
86	Zm00001d011078	11.4	14.1	15.9	15	15.3	2.7	4.8	2.1	2	1.6	1.3	0.5	0.5	0.8	0.5	0.8	0.4	0.9	0.5	1.1	11.5	8	6.7	7.7	5	3.8	3.7	17.2	14.9	13.3	19.9	16.1	6.2	0.8	4.5	5.6	6	5.1	8.9	7.1	3.3	6.6	11	7	5.8	4.6
87	Zm00001d012675	359.7	430	473.3	514	606.6	82.5	119.9	52.6	49.8	42.6	333.1	180.1	141.8	273.9	217.7	330.4	142.2	103.3	232.9	108.8	266.9	366.5	391.9	280.3	156.7	169.7	175.5	567	598.5	210.3	213.6	280.8	593.3	109.5	888.9	1399.4	1790.6	1628	612.3	1339.8	602.3	1200.2	449.7	733.1	662	2475
88	Zm00001d012677	8.3	11.9	8.8	8.3	6.1	12.2	14.9	10.1	7.9	8.2	7.5	8.9	13.3	24.1	17.7	7.1	8.1	10.2	14.4	21.7	47.2	40.2	36.6	22.9	18	12.6	12.3	23.4	28.4	48.4	24.9	23.4	29	15.4	40.6	25.4	19.6	26.9	20.4	23.1	16.3	29.6	23.4	20	22.1	28
89	Zm00001d012679	59.9	17.6	12.2	12.8	16.1	59.2	15.5	11.4	9.6	11.2	13	9.4	11.7	8.7	13.5	10.1	10.3	10.1	15.9	14.7	15.5	15.4	14.4	14.7	15.6	11.3	12.1	18	22.2	11.1	7.9	9.2	12.4	13.1	12.6	28	24.3	29.4	15.2	24.8	17.5	15.6	13.3	13.9	19.6	21.1
90	Zm00001d048102	58.9	64.1	69.8	65.5	60.6	52.3	45.7	32.3	25.9	24.2	38.1	35.7	36.2	46	43.6	36.5	34.7	34.8	36.4	32.6	65	61.1	76.4	79	45.8	34.2	31	78.3	62.8	67.6	33.6	43.5	45.6	72.9	75	54.4	91.5	63	98.9	72.5	39.4	62	67.9	53.6	52.5	70.7
91	Zm00001d048104	5.4	3.5	3.3	3.6	1.5	1.9	1.4	1	1.1	1.2	0	0.2	0	0.1	0	0.1	0.2	0.1	0.2	0.1	3.7	1.6	1.1	1.5	1.5	1.3	1.1	4	3.6	3.7	8.4	7	0.5	0.4	0.1	1	0.5	0.8	0.7	0.7	0.3	0.9	0.1	0.5	0.5	0.4
92	Zm00001d048105	6.5	8.9	9.9	11.1	9.3	8	11.1	9.8	9.9	8.1	18.2	25.2	18.6	27.9	21.1	15.6	22.9	18.1	23.7	21.9	9	12.5	10.9	13.9	12.7	12.3	10.3	11.4	12.6	7.2	16.5	17.1	16.6	18.3	9.5	12.9	10.7	12.1	11.3	9.7	14.1	11.3	8.1	13.9	10.8	10
93	Zm00001d048108	2.9	2.2	2.3	2.1	1.9	1.8	1	0.6	0.9	0.2	0.7	0	0.4	1.4	0.4	0.5	0.8	0.4	0.4	0.2	3	1.6	3.3	2.7	2.3	0.6	0.8	3.8	2.5	2.9	0.9	1.9	3.4	2.6	2	2.4	3.3	1.6	3.4	3.9	2.4	2.2	5	3.3	5.2	3.5
94	Zm00001d048109	1.1	1.8	2.3	2.5	2.8	1.5	1.4	2.5	1.9	1.7	2.7	6.7	6.7	2.3	0.8	2.7	5.6	4.6	5.7	4.3	2.1	1.7	1	0.8	1.5	1.6	1.7	1.8	6.2	1.5	1.2	0.7	0.5	0.5	0.6	4.8	1.7	4.2	1.6	3.5	3.9	2.3	3.8	2.9	2.5	6
95	Zm00001d048110	6.3	8.2	10.6	10.3	10.1	10.5	8.6	6.1	7.2	4.7	10.1	7	8.1	9	5	7.9	7.8	6.3	8	7.3	14.1	11.8	16	18	10	7.5	6.5	12.3	11.9	12.8	9.9	9.5	11.7	6.7	10.5	9.1	8.2	7.6	9.2	7.2	9.2	10	8.4	9.5	8.9	9.2
96	Zm00001d048111	0	0.1	0.2	0.1	0.1	0.4	0.7	0.9	1	1.4	0.1	0.5	1	10.7	27.9	0.2	0.4	0.5	1.9	3.7	0.8	0.6	1.2	0.5	0.9	1.2	1.3	1.8	1	0.7	0.1	0.7	6.8	1.8	3.8	4.4	6.1	4.1	1.8	3.8	2.2	4.1	2.8	4.4	7.1	12.6
97	Zm00001d048112	4.4	8.2	6.9	7.2	7.5	5.4	8.5	7.5	5.3	8.7	13.2	15.5	15.7	20.8	21.1	17	13.4	16.7	16.3	19.4	13.6	18.4	19.2	11.2	9.1	7.4	7.7	7.9	4.4	13.5	9.7	9.7	17.3	24.1	12	8.3	2.7	7.1	7	6.3	8.2	9.2	9.5	8.2	8.2	8.5
98	Zm00001d048115	4	6.2	8	8.9	7.6	2.2	4	3.3	4.5	4.1	7.3	9.1	7.2	23.3	13.1	7.6	7.9	7.4	7.8	8.7	7.5	8.2	7.3	6	4.6	5.1	5.3	5.4	4.5	8.5	13.5	8.3	7.7	4	5.4	4.1	4.1	3.8	5	4.9	5.3	6.9	6.7	5.2	4.3	3.9
99	Zm00001d048116	0.4	0.5	0.2	0.5	0.3	0.9	0.6	0.7	0.8	1	76.7	90.1	47.5	14.5	3.4	72.5	92.7	57.6	55.8	30.2	2.7	1.4	1.4	0.5	0.5	0.4	0.4	3.6	2.2	2.8	0.9	0.7	3.9	11.3	7.1	1.9	2.7	1.4	6	6.2	56.6	1.7	16.8	3.4	5.8	5.3
100	Zm00001d048117	17.8	20	14.9	11.8	9.8	14	11.2	8.1	6.7	5.5	4.5	5.6	5.7	7.8	17.4	5.3	7	6.5	7.8	5.7	8.9	6.1	9.3	16.7	10.1	7.9	6.9	10.4	7.7	8.5	9.9	11.7	7	4.6	12.3	6.8	9.4	7.5	10.4	10.7	8	4.8	13.1	6.4	5.7	11.6
101	Zm00001d048119	14.2	23.6	28.2	28.3	21.4	5.8	12.4	10.9	10.1	8.8	14.9	10.6	14.6	10.9	8.9	12.4	9.8	14.6	8.8	12	29	26.8	21.2	15.6	14	10.9	11	24.3	21.6	31.4	41.9	39.7	19.5	12.6	20.4	12.3	14.2	13.7	17.3	13.4	13.5	14.2	14.2	15.7	13.9	14.1
102	Zm00001d048122	3.3	9.2	8.4	10.3	9.3	4	7.3	7.1	6.9	6.5	4.7	4	5.2	7.5	5.9	5	4	4.3	4.6	5.4	12.3	15.8	13.3	9.6	7.7	8.2	7.1	9.6	10.9	10.5	10.7	10.3	14.8	9.8	8.9	12.5	13.3	11.8	16.3	11.6	9.9	10.3	11.7	13.7	12.5	12.8
103	Zm00001d048126	10.3	18.6	15.1	12.6	13.5	13.4	20.8	21.4	21.1	21	11.7	12.6	11.6	10.1	9.9	10.4	13.6	12.1	12.6	14.6	26.7	21.7	21	21.8	19.4	16.2	15.5	22.5	15.2	22.6	18.7	24.8	22.2	15.3	16	18.6	14.4	18.9	15.4	15.7	15.5	16.7	14	20.6	16.6	15.2
104	Zm00001d048129	6	9.4	10.9	11.3	8	1.9	3.8	1.7	1.7	1.7	12.5	7.2	7.9	27.9	50.2	9.8	4.9	6.7	13.6	32.2	14.8	21.9	20.5	8.4	7.6	5.8	5.5	17.7	36.9	14	12.3	16.4	23.8	9.6	12.4	26.5	21.8	24.2	12.9	21	17.1	24.4	22	65.7	30.9	31.2
